# Supplementary material for: Proteomic characteristics of saliva in patients with different subgroups of IgG4-RD
Source: Front Immunol. 2022 Nov 22;13:1026921. doi: 10.3389/fimmu.2022.1026921 (PMC9723444; doi:10.3389/fimmu.2022.1026921)
Supplement: Supplementary Table 1 — The immune categories of DEPs identified in IgG4-RD and HC in salivary by using IMMPORT database. [file Table_1.xlsx]

## Sheet: Table S1
CD55	Antimicrobials
LYPD3	Antimicrobials
CD59	Antimicrobials
IGHA2	Antimicrobials
APP	Antimicrobials
ANXA5	Antimicrobials
CPNE3	Antimicrobials
CD82	Antimicrobials
NPC2	Antimicrobials
PSAT1	Antimicrobials
SNX18	Antimicrobials
EHD1	Antimicrobials
FCGR3B	Antimicrobials
DPP7	Antimicrobials
TYROBP	Antimicrobials
SPRR2A	Antimicrobials
QSOX1	Antimicrobials
S100A4	Antimicrobials
TP53I3	Antimicrobials
HK3	Antimicrobials
LGALS3	Antimicrobials
ANXA2	Antimicrobials
IST1	Antimicrobials
CR1	Antimicrobials
MYO1F	Antimicrobials
PARK7	Antimicrobials
PEBP1	Antimicrobials
CAND1	Antimicrobials
YWHAG	Antimicrobials
VCP	Antimicrobials
CYTH1	Antimicrobials
RPS3	Antimicrobials
SKP1	Antimicrobials
DLD	Antimicrobials
C5	Antimicrobials
HSPA9	Antimicrobials
RPL12	Antimicrobials
RPN2	Antimicrobials
LAMB2	Antimicrobials
DDX1	Antimicrobials
MDH2	Antimicrobials
RPLP2	Antimicrobials
ITIH2	Antimicrobials
ECH1	Antimicrobials
HSPB1	Antimicrobials
CPB2	Antimicrobials
TNNT3	Antimicrobials
CA2	Antimicrobials
TMEM40	Antimicrobials
CA1	Antimicrobials
COL14A1	Antimicrobials
SERPINF2	Antimicrobials
CD81	BCRSignalingPathway
IGHA2	BCRSignalingPathway
FPR2	Chemokine_Receptors
C5	Chemokines
FCGR3B	NaturalKiller_Cell_Cytotoxicity
TYROBP	NaturalKiller_Cell_Cytotoxicity
