# Supplementary material for: Proteomic characteristics of saliva in patients with different subgroups of IgG4-RD
Source: Front Immunol. 2022 Nov 22;13:1026921. doi: 10.3389/fimmu.2022.1026921 (PMC9723444; doi:10.3389/fimmu.2022.1026921)
Supplement: Supplementary Table 2 — DEPs identified in the comparisons between IgG4-RD with four subgroups. [file Table_2.xlsx]

## Sheet: A_B
Accession	Gene	Description	Mw(kDa)	Corrected A/B	log2 A/B	P-value	P.adjust	Diff Sig	Count	10	2	3	5	7
O00592	PODXL	Podocalyxin OS=Homo sapiens OX=9606 GN=PODXL PE=1 SV=2	58.635	4.55802	2.18841	0.003823	0.986334	+	5	15.0252	15.0961	14.8627	13.1447	12.4678
P16402	H1-3	Histone H1.3 OS=Homo sapiens OX=9606 GN=H1-3 PE=1 SV=2	22.35	3.99405	1.99785	0.04608	0.995631	+	5	12.6418	12.2805	12.8832	9.84782	11.3601
P45877	PPIC	Peptidyl-prolyl cis-trans isomerase C OS=Homo sapiens OX=9606 GN=PPIC PE=1 SV=1	22.763	3.68906	1.88326	0.03084	0.995631	+	5	12.6523	12.0232	11.4717	10.4497	9.88185
A0A590UJZ9	DMBT1	Deleted in malignant brain tumors 1 protein OS=Homo sapiens OX=9606 GN=DMBT1 PE=1 SV=1	166.577	3.36688	1.75141	0.04203	0.995631	+	5	18.5518	17.7206	17.3196	15.832	16.3932
P45974	USP5	Ubiquitin carboxyl-terminal hydrolase 5 OS=Homo sapiens OX=9606 GN=USP5 PE=1 SV=2	95.786	2.92029	1.54611	0.03621	0.995631	+	3	NA	9.27971	9.17806	7.68278	NA
Q86VR7	VSIG10L	V-set and immunoglobulin domain-containing protein 10-like OS=Homo sapiens OX=9606 GN=VSIG10L PE=2 SV=2	91.625	2.86501	1.51854	0.03514	0.995631	+	5	14.3028	13.3948	13.6955	11.9705	12.5877
P04745	AMY1A	Alpha-amylase 1 OS=Homo sapiens OX=9606 GN=AMY1A PE=1 SV=2	57.768	2.73228	1.4501	0.02147	0.995631	+	5	19.9163	20.5966	20.3064	18.5455	19.1005
A0A669KAX1	HMGA1	High mobility group protein HMG-I/HMG-Y (Fragment) OS=Homo sapiens OX=9606 GN=HMGA1 PE=1 SV=1	3.306	2.66065	1.41178	0.02899	0.995631	+	5	12.1499	12.6343	12.7478	10.7392	11.4586
Q9HBR0	SLC38A10	Putative sodium-coupled neutral amino acid transporter 10 OS=Homo sapiens OX=9606 GN=SLC38A10 PE=1 SV=2	119.762	2.55344	1.35244	0.01517	0.995631	+	5	15.3037	14.7797	14.7652	13.4068	13.7874
P12110	COL6A2	Collagen alpha-2(VI) chain OS=Homo sapiens OX=9606 GN=COL6A2 PE=1 SV=4	108.579	2.44626	1.29058	0.04571	0.995631	+	5	14.2637	14.5507	15.1433	13.6341	13.0899
A0A5F9ZHD4	ACAT1	Acetyl-CoA acetyltransferase, mitochondrial OS=Homo sapiens OX=9606 GN=ACAT1 PE=1 SV=1	32.584	2.44556	1.29016	0.01504	0.995631	+	3	NA	10.9252	10.8899	9.61739	NA
P01706	IGLV2-11	Immunoglobulin lambda variable 2-11 OS=Homo sapiens OX=9606 GN=IGLV2-11 PE=1 SV=2	12.644	2.42155	1.27593	0.01675	0.995631	+	5	15.2311	15.2361	14.8649	14.1165	13.5531
Q16778	H2BC21	Histone H2B type 2-E OS=Homo sapiens OX=9606 GN=H2BC21 PE=1 SV=3	13.92	2.37724	1.24929	0.03461	0.995631	+	5	12.614	12.9256	12.6335	11.0552	11.895
A0A0J9YVY2	LAD1	Ladinin-1 (Fragment) OS=Homo sapiens OX=9606 GN=LAD1 PE=1 SV=1	20.724	2.22789	1.15568	0.02317	0.995631	+	3	NA	10.3921	10.4407	9.26073	NA
Q15691	MAPRE1	Microtubule-associated protein RP/EB family member 1 OS=Homo sapiens OX=9606 GN=MAPRE1 PE=1 SV=3	29.999	1.98429	0.988625	0.02247	0.995631	+	5	11.47	11.1771	11.3402	10.073	10.6079
P07902	GALT	Galactose-1-phosphate uridylyltransferase OS=Homo sapiens OX=9606 GN=GALT PE=1 SV=3	43.363	1.94798	0.96198	0.02077	0.995631	+	3	NA	10.1716	10.2079	9.22777	NA
M0QX27	PLAUR	Urokinase plasminogen activator surface receptor (Fragment) OS=Homo sapiens OX=9606 GN=PLAUR PE=1 SV=1	8.912	1.60381	0.681504	0.002335	0.753038	+	3	NA	10.7667	10.7638	10.0837	NA
P07711	CTSL	Cathepsin L1 OS=Homo sapiens OX=9606 GN=CTSL PE=1 SV=2	37.564	1.52142	0.605421	0.006738	0.995631	+	5	14.205	14.0919	14.0845	13.4214	13.6221
O15067	PFAS	Phosphoribosylformylglycinamidine synthase OS=Homo sapiens OX=9606 GN=PFAS PE=1 SV=4	144.734	1.47838	0.564017	0.03608	0.995631	+	3	NA	9.92133	9.95829	9.37579	NA
H3BS10	HEXA	Beta-hexosaminidase OS=Homo sapiens OX=9606 GN=HEXA PE=1 SV=1	58.44	1.26641	0.340749	0.04098	0.995631	+	5	14.7585	14.9892	14.801	14.5588	14.4588
H3BM24	HDAC2	Histone deacetylase 2 (Fragment) OS=Homo sapiens OX=9606 GN=HDAC2 PE=1 SV=1	18.701	1.20228	0.265772	0.00045	0.29025	+	5	10.1958	10.2233	10.1884	9.92642	9.94704
D6RHH4	RACK1	Receptor of-activated protein C kinase 1 OS=Homo sapiens OX=9606 GN=RACK1 PE=1 SV=1	25.869	0.807216	-0.308973	0.04041	0.995631	-	3	NA	11.2095	11.2322	11.5298	NA
P15291	B4GALT1	Beta-1,4-galactosyltransferase 1 OS=Homo sapiens OX=9606 GN=B4GALT1 PE=1 SV=5	43.92	0.791406	-0.33751	0.03687	0.995631	-	3	NA	12.5914	12.5688	12.9176	NA
E9PHH3	SDC1	Syndecan-1 OS=Homo sapiens OX=9606 GN=SDC1 PE=1 SV=1	17.782	0.778467	-0.361291	0.03673	0.995631	-	5	10.0949	9.83084	9.97863	10.305	10.3538
Q9NP72	RAB18	Ras-related protein Rab-18 OS=Homo sapiens OX=9606 GN=RAB18 PE=1 SV=1	22.977	0.746078	-0.422601	0.02698	0.995631	-	3	NA	13.1485	13.1691	13.5814	NA
P16298	PPP3CB	Serine/threonine-protein phosphatase 2B catalytic subunit beta isoform OS=Homo sapiens OX=9606 GN=PPP3CB PE=1 SV=2	59.024	0.74294	-0.428682	0.02819	0.995631	-	5	12.9822	12.9954	13.1415	13.3546	13.5822
P07954	FH	Fumarate hydratase, mitochondrial OS=Homo sapiens OX=9606 GN=FH PE=1 SV=3	54.637	0.738035	-0.438239	0.006258	0.995631	-	5	13.1454	13.1247	13.0537	13.6166	13.4757
C9JTY3	TFG	Protein TFG (Fragment) OS=Homo sapiens OX=9606 GN=TFG PE=1 SV=1	14.759	0.722609	-0.468714	0.006998	0.995631	-	5	11.8613	12.0261	11.882	12.4226	12.3611
P36952	SERPINB5	Serpin B5 OS=Homo sapiens OX=9606 GN=SERPINB5 PE=1 SV=2	42.1	0.70323	-0.507931	0.0484	0.995631	-	5	16.6241	16.5449	16.2654	17.0817	16.8905
H7C2Y5	H7C2Y5	DnaJ_C domain-containing protein (Fragment) OS=Homo sapiens OX=9606 PE=1 SV=8	19.261	0.671731	-0.574045	0.02426	0.995631	-	3	NA	10.4167	10.3915	10.9781	NA
P62258	YWHAE	14-3-3 protein epsilon OS=Homo sapiens OX=9606 GN=YWHAE PE=1 SV=1	29.174	0.647971	-0.625999	0.02375	0.995631	-	5	14.1656	14.1148	14.4767	14.8557	14.9011
Q99497	PARK7	Parkinson disease protein 7 OS=Homo sapiens OX=9606 GN=PARK7 PE=1 SV=2	19.891	0.621897	-0.685252	0.01515	0.995631	-	5	13.5342	13.2452	13.5484	14.1923	14.0635
P31150	GDI1	Rab GDP dissociation inhibitor alpha OS=Homo sapiens OX=9606 GN=GDI1 PE=1 SV=2	50.583	0.621253	-0.686747	0.03936	0.995631	-	5	13.9436	14.1283	14.4068	14.9678	14.7249
Q9NY33	DPP3	Dipeptidyl peptidase 3 OS=Homo sapiens OX=9606 GN=DPP3 PE=1 SV=2	82.589	0.615875	-0.69929	0.02359	0.995631	-	5	15.1176	14.8695	15.2479	15.6711	15.8842
P16930	FAH	Fumarylacetoacetase OS=Homo sapiens OX=9606 GN=FAH PE=1 SV=2	46.374	0.610001	-0.713116	0.02875	0.995631	-	5	13.7766	13.3929	13.6412	14.4598	14.1735
P36543	ATP6V1E1	V-type proton ATPase subunit E 1 OS=Homo sapiens OX=9606 GN=ATP6V1E1 PE=1 SV=1	26.145	0.608953	-0.715598	0.04195	0.995631	-	5	11.1819	11.0486	11.5293	11.8371	12.1007
P61158	ACTR3	Actin-related protein 3 OS=Homo sapiens OX=9606 GN=ACTR3 PE=1 SV=3	47.371	0.605865	-0.722932	0.04112	0.995631	-	5	15.1159	15.154	15.6105	16.0762	15.9566
Q96G03	PGM2	Phosphoglucomutase-2 OS=Homo sapiens OX=9606 GN=PGM2 PE=1 SV=4	68.283	0.593025	-0.753836	0.01891	0.995631	-	5	14.5079	14.3856	14.6005	15.4415	15.0622
F6TLX2	GLOD4	Glyoxalase domain-containing protein 4 OS=Homo sapiens OX=9606 GN=GLOD4 PE=1 SV=1	54.72	0.558175	-0.84121	0.04926	0.995631	-	5	15.4895	15.5876	15.8285	16.7827	16.1701
P13804	ETFA	Electron transfer flavoprotein subunit alpha, mitochondrial OS=Homo sapiens OX=9606 GN=ETFA PE=1 SV=1	35.08	0.537065	-0.896833	0.01422	0.995631	-	5	11.6108	11.7575	12.0501	12.6348	12.7712
B8ZZ54	HSPE1	10 kDa heat shock protein, mitochondrial OS=Homo sapiens OX=9606 GN=HSPE1 PE=1 SV=1	5.19	0.529571	-0.917103	0.0002945	0.29025	-	5	13.3784	13.3066	13.2529	14.2333	14.2262
O60701	UGDH	UDP-glucose 6-dehydrogenase OS=Homo sapiens OX=9606 GN=UGDH PE=1 SV=1	55.024	0.505651	-0.983787	0.01044	0.995631	-	5	10.6709	10.6519	11.0551	11.7464	11.8064
Q66K74	MAP1S	Microtubule-associated protein 1S OS=Homo sapiens OX=9606 GN=MAP1S PE=1 SV=2	112.211	0.471225	-1.08551	0.03081	0.995631	-	5	9.16111	9.34442	9.00937	9.9188	10.5955
Q9H4E7	DEF6	Differentially expressed in FDCP 6 homolog OS=Homo sapiens OX=9606 GN=DEF6 PE=1 SV=1	73.91	0.470925	-1.08643	0.03004	0.995631	-	5	9.79475	10.2489	9.50653	10.9295	10.9434
O95817	BAG3	BAG family molecular chaperone regulator 3 OS=Homo sapiens OX=9606 GN=BAG3 PE=1 SV=3	61.595	0.467671	-1.09643	0.001952	0.753038	-	5	13.2055	13.0102	13.0107	14.084	14.2598
A0A494C0G1	PGM3	Phosphoacetylglucosamine mutase OS=Homo sapiens OX=9606 GN=PGM3 PE=1 SV=1	55.387	0.463894	-1.10813	0.01351	0.995631	-	5	11.7207	11.4904	11.9534	12.6659	12.9933
B5MCX3	SEPTIN2	Septin-2 OS=Homo sapiens OX=9606 GN=SEPTIN2 PE=1 SV=1	36.94	0.448423	-1.15707	0.01421	0.995631	-	5	13.281	12.8433	12.8187	14.2907	13.9854
H0YNP1	GLCE	Heparosan-N-sulfate-glucuronate 5-epimerase OS=Homo sapiens OX=9606 GN=GLCE PE=1 SV=1	62.887	0.403546	-1.3092	0.04991	0.995631	-	3	NA	9.56407	9.44532	10.8139	NA
F2Z3J9	PTGR1	15-oxoprostaglandin 13-reductase OS=Homo sapiens OX=9606 GN=PTGR1 PE=1 SV=3	32.729	0.382452	-1.38665	0.04126	0.995631	-	5	14.0344	14.0169	14.4419	16.0356	15.0665
A0AVT1	UBA6	Ubiquitin-like modifier-activating enzyme 6 OS=Homo sapiens OX=9606 GN=UBA6 PE=1 SV=1	117.97	0.376762	-1.40827	0.02187	0.995631	-	5	8.89415	8.43796	9.25576	10.4018	10.14
P07738	BPGM	Bisphosphoglycerate mutase OS=Homo sapiens OX=9606 GN=BPGM PE=1 SV=2	30.005	0.347578	-1.52459	0.03247	0.995631	-	5	10.2535	10.3232	9.91318	12.1827	11.193
G3V279	ERH	Enhancer of rudimentary homolog OS=Homo sapiens OX=9606 GN=ERH PE=1 SV=1	8.203	0.325769	-1.61808	0.03042	0.995631	-	3	NA	9.33354	9.42288	10.9963	NA
E7EX40	RAB11FIP1	Rab11 family-interacting protein 1 OS=Homo sapiens OX=9606 GN=RAB11FIP1 PE=1 SV=1	54.833	0.275576	-1.85948	0.04716	0.995631	-	5	11.629	10.9507	10.2944	12.4426	13.1924

## Sheet: A_C
Gene	Fc	P-value	P.adjust	Diff Sig	Count	10	2	3	6	8
RO60	5.39256	0.002747	0.442827	+	4	NA	11.915	12.4466	6.69037	6.88607
HSPA8	3.75248	0.005856	0.442827	+	3	13.587	NA	NA	9.85448	9.81462
HTN1	3.69175	0.001322	0.442827	+	5	11.0265	11.6941	10.9191	7.5553	7.48765
MAMDC2	3.25057	0.03902	0.442827	+	5	12.1218	13.1846	13.6511	8.77399	10.6965
PODXL	2.90119	0.001448	0.442827	+	5	15.0252	15.0961	14.8627	11.7738	12.4132
FUT6	2.75289	0.01431	0.442827	+	5	13.4477	14.7301	14.6527	11.5408	11.5072
LAMC1	2.47307	0.0204	0.442827	+	5	10.7257	11.8116	12.1083	8.96541	9.18557
FOLR1	2.47213	0.01599	0.442827	+	3	15.1848	NA	NA	12.7485	12.6768
COL6A2	2.21426	0.007242	0.442827	+	5	14.2637	14.5507	15.1433	12.37	12.5067
BLMH	2.12403	0.0292	0.442827	+	5	10.2352	11.4867	11.4406	9.07331	8.78702
IGHV3-72	2.04385	0.01854	0.442827	+	5	12.742	13.6276	13.7255	11.095	11.5474
CPE	2.00775	0.02554	0.442827	+	5	15.7176	16.8411	16.2433	13.9329	14.5863
EGF	2.00709	0.009208	0.442827	+	5	15.3804	14.8521	15.38	12.8693	13.5249
IGLV7-43	2.00063	0.02787	0.442827	+	5	16.4268	15.1267	16.0259	13.9326	13.7858
IGLV7-46	1.90455	0.03754	0.442827	+	5	15.1926	13.8082	14.6278	12.8047	12.4719
IGLV2-11	1.83643	0.001949	0.442827	+	5	15.2311	15.2361	14.8649	13.1654	13.3832
ITIH1	1.82218	0.04382	0.45684	+	5	13.7745	14.078	15.1494	12.4191	12.6045
MYH14	1.77661	0.04364	0.45684	+	4	NA	12.8383	13.5012	11.5867	11.1996
DCD	1.76781	0.002628	0.442827	+	5	13.7779	13.9793	13.8601	11.8707	12.3386
MGAT1	1.73592	0.00783	0.442827	+	5	13.0082	13.5982	13.5833	11.5175	11.8038
CPD	1.69397	0.02448	0.442827	+	5	15.4895	15.0171	15.7494	13.3328	14.1166
GOLM1	1.65993	0.02506	0.442827	+	5	15.3128	14.6682	14.6591	13.6	12.8402
MSLN	1.6585	0.04685	0.466757	+	5	14.3697	13.6315	14.9105	12.8721	12.4187
DAG1	1.59361	0.01053	0.442827	+	5	14.165	13.5678	13.9613	12.0879	12.5209
FAT2	1.57876	0.02932	0.442827	+	5	14.7422	15.1043	15.6845	13.3443	13.8522
DDR1	1.51113	0.03994	0.442827	+	5	11.8742	10.9291	11.545	9.60904	10.2676
PRELP	1.46777	0.01938	0.442827	+	5	11.84	12.252	12.4317	10.404	11.0096
GPLD1	1.4676	0.03642	0.442827	+	5	12.9314	11.8509	12.4895	10.913	10.9996
GRIPAP1	1.46596	0.02226	0.442827	+	3	11.4739	NA	NA	9.97831	10.0375
LSR	1.40342	0.01653	0.442827	+	5	14.966	14.6545	14.6308	13.0088	13.6853
PPM1L	1.36323	0.02782	0.442827	+	5	11.6427	11.9116	12.2398	10.2238	10.9125
VSIG10L	1.33255	0.03349	0.442827	+	5	14.3028	13.3948	13.6955	12.3412	12.5891
SERPINI1	1.33193	0.04864	0.469392	+	5	15.8538	15.1229	15.2508	14.4721	13.6824
F5	1.23906	0.03561	0.442827	+	5	13.7063	13.1609	14.025	12.2612	12.5222
GET4	1.23598	0.03177	0.442827	+	3	10.8095	NA	NA	9.60919	9.53791
CLU	1.22513	0.03041	0.442827	+	5	17.2843	17.4023	17.4048	15.7202	16.5571
IGHV1-24	1.15778	0.02063	0.442827	+	5	11.3178	11.1152	11.7857	10.2099	10.287
CBR1	1.11703	0.0208	0.442827	+	5	14.2338	14.0986	14.4447	13.4279	12.8561
PROS1	1.09262	0.03701	0.442827	+	5	9.23205	9.97473	9.85586	8.68177	8.50808
AMBP	1.08401	0.01555	0.442827	+	3	14.6007	NA	NA	13.532	13.5014
CRNN	1.06894	0.008629	0.442827	+	5	14.3301	14.2727	14.6189	13.4792	13.1973
BPIFB2	1.048	0.0356	0.442827	+	5	16.4934	16.7142	16.0223	15.2076	15.5164
PITHD1	1.04793	0.02238	0.442827	+	5	13.4138	14.0294	13.8864	12.7072	12.75
IGLV3-16	0.947854	0.0412	0.446718	+	5	13.4975	13.3284	13.1497	12.0513	12.7034
GBA	0.941129	0.01198	0.442827	+	5	13.2451	13.5015	13.6862	12.6006	12.4723
FKBP1A	0.936893	0.01416	0.442827	+	5	12.9464	13.3477	13.3378	12.1896	12.3579
ERO1B	0.930727	0.03395	0.442827	+	5	9.75251	10.2957	10.3224	9.09473	9.29092
HSPA13	0.897944	0.02985	0.442827	+	5	12.4511	12.9188	13.0324	11.9206	11.885
ACP3	0.841056	0.02454	0.442827	+	5	13.2719	13.3439	13.6847	12.4396	12.7452
CADM4	0.799346	0.02542	0.442827	+	5	12.1776	12.1118	12.2685	11.1405	11.6327
TINAGL1	0.669847	0.02372	0.442827	+	3	9.47462	NA	NA	8.8192	8.79036
RAB44	0.621803	0.03983	0.442827	+	5	11.4361	11.7782	11.8961	11.0709	11.0924
MMP25	0.557426	0.02382	0.442827	+	3	10.8979	NA	NA	10.3284	10.3525
BPIFB1	0.298872	0.006083	0.442827	+	5	15.8699	15.8625	15.7918	15.5808	15.5043
ACAP2	0.278981	0.02945	0.442827	+	3	8.49864	NA	NA	8.2122	8.22712
NUDT16	0.26877	0.03612	0.442827	+	3	10.1638	NA	NA	9.90379	9.88617
UBE2M	-0.332176	0.003117	0.442827	-	3	11.162	NA	NA	11.4932	11.4951
TFG	-0.372161	0.01661	0.442827	-	5	11.8613	12.0261	11.882	12.2454	12.3452
ACYP2	-0.386063	0.003071	0.442827	-	3	9.79701	NA	NA	10.1841	10.182
FH	-0.403179	0.03225	0.442827	-	5	13.1454	13.1247	13.0537	13.6455	13.3767
PARVG	-0.420386	0.04476	0.463183	-	3	11.2135	NA	NA	11.651	11.6168
DIAPH1	-0.421954	0.02184	0.442827	-	3	11.5915	NA	NA	12.0218	12.005
ARG1	-0.436475	0.01078	0.442827	-	5	15.2925	15.2181	15.11	15.6901	15.5966
PARK7	-0.457166	0.03989	0.442827	-	5	13.5342	13.2452	13.5484	13.9409	13.8586
FBP1	-0.464974	0.02351	0.442827	-	5	12.3597	12.0838	12.2662	12.7417	12.6614
ADSS2	-0.495508	0.01981	0.442827	-	5	14.7129	14.4228	14.5813	15.0818	15.0538
NUDC	-0.525906	0.03511	0.442827	-	5	11.3138	11.5779	11.4342	11.8279	12.1078
HSP90AB1	-0.539893	0.01194	0.442827	-	5	14.3451	14.5279	14.5865	15.0665	14.9862
HSPA8	-0.549355	0.02074	0.442827	-	5	17.3235	16.9951	17.1487	17.7138	17.6964
PGM1	-0.565173	0.03748	0.442827	-	5	15.7423	16.0228	16.0908	16.4126	16.6217
FCGR3A	-0.575663	0.03601	0.442827	-	5	13.6214	13.373	13.4928	13.8986	14.2442
BAG3	-0.579869	0.03768	0.442827	-	5	13.2055	13.0102	13.0107	13.8423	13.4684
PEPD	-0.603891	0.01464	0.442827	-	5	11.5206	11.7727	11.8148	12.3065	12.3067
IPO9	-0.614625	0.01538	0.442827	-	3	11.195	NA	NA	11.8182	11.801
TPM3	-0.649733	0.03966	0.442827	-	3	9.98918	NA	NA	10.6623	10.6155
PTPRC	-0.657494	0.03994	0.442827	-	5	12.6176	12.3161	12.5052	12.9349	13.3393
PIK3R1	-0.662032	0.007224	0.442827	-	5	11.2411	11.1014	11.036	11.7022	11.8742
GNS	-0.670011	0.03116	0.442827	-	5	15.6641	15.2556	15.4604	16.0156	16.2445
RSU1	-0.674637	0.0361	0.442827	-	5	13.3867	13.2539	13.0694	13.7192	14.1035
EHD1	-0.67728	0.02959	0.442827	-	5	11.5611	11.9817	11.9399	12.5165	12.4931
SEPTIN2	-0.686564	0.04867	0.469392	-	5	13.281	12.8433	12.8187	13.7871	13.548
GSTO1	-0.699399	0.03688	0.442827	-	5	14.0092	14.4877	14.2954	15.0642	14.8628
EIF3A	-0.71134	0.007101	0.442827	-	5	10.0902	10.1056	10.2559	10.974	10.7498
RETN	-0.728748	0.03774	0.442827	-	3	8.47834	NA	NA	9.23205	9.18211
MAGOHB	-0.73516	0.002321	0.442827	-	3	11.3062	NA	NA	12.0398	12.0429
PTPN6	-0.740065	0.04872	0.469392	-	5	13.748	13.7882	13.6102	14.7498	14.1613
DPP3	-0.75405	0.01347	0.442827	-	5	15.1176	14.8695	15.2479	15.8182	15.8466
NDE1	-0.754473	0.01615	0.442827	-	3	9.47391	NA	NA	10.2394	10.2173
MAT2A	-0.762739	0.007157	0.442827	-	5	11.9275	11.7865	12.0857	12.7386	12.6534
ROCK1	-0.764128	0.03144	0.442827	-	5	12.9886	12.8248	12.7355	13.8489	13.3786
HK3	-0.787197	0.01644	0.442827	-	5	13.2532	13.0389	13.471	14.0532	14.03
MPO	-0.79596	0.02573	0.442827	-	5	16.0377	15.5673	15.6664	16.48	16.6261
HNRNPL	-0.816233	0.02938	0.442827	-	5	11.1372	11.016	10.9696	12.1222	11.5921
IMPA1	-0.823184	0.01183	0.442827	-	5	13.0313	12.664	12.938	13.6388	13.7631
HACD3	-0.834278	0.01833	0.442827	-	3	9.10467	NA	NA	9.95282	9.92507
NIT2	-0.845081	0.04632	0.466638	-	5	14.8387	14.5561	15.1025	15.8887	15.4663
STK26	-0.873997	0.01009	0.442827	-	5	11.4723	11.3403	11.5965	12.4991	12.1883
MYH9	-0.895707	0.04157	0.446718	-	5	17.43	17.2485	17.6809	18.6239	18.0738
GNPDA1	-0.897713	0.02897	0.442827	-	5	14.3682	13.7779	13.989	14.8829	15.0027
OLA1	-0.898774	0.02355	0.442827	-	5	10.1955	9.85631	10.1907	10.7749	11.1842
BASP1	-0.915597	0.04212	0.449173	-	5	13.511	13.8253	13.3982	14.7778	14.2097
ALDH16A1	-0.952877	0.04515	0.463783	-	5	11.1403	11.4583	11.8901	12.5323	12.3659
PAFAH1B1	-0.957835	0.0399	0.442827	-	5	13.3877	12.7149	13.0146	14.1463	13.8475
MTHFD1	-0.973968	0.01603	0.442827	-	5	10.969	11.1494	11.1778	12.3126	11.8328
RAB32	-1.01938	0.01756	0.442827	-	5	12.1996	11.7266	11.7654	12.8006	13.0326
RAB6A	-1.02169	0.005383	0.442827	-	5	13.5797	13.579	13.5885	14.7927	14.4155
TXNRD1	-1.04485	0.005126	0.442827	-	5	14.1888	13.9427	13.8488	15.1101	14.9665
MOB1A	-1.05344	0.008846	0.442827	-	5	10.6391	10.6793	10.2928	11.6827	11.4983
EEA1	-1.05694	0.008067	0.442827	-	3	9.15464	NA	NA	10.2193	10.2038
YWHAB	-1.07051	0.03516	0.442827	-	5	14.1379	13.8729	13.396	14.984	14.7616
GRB2	-1.1038	0.01986	0.442827	-	5	14.5971	14.416	14.0215	15.3101	15.5872
PTPA	-1.11583	0.0314	0.442827	-	5	11.553	11.0659	10.7866	12.3011	12.2009
ARHGAP25	-1.11801	0.01083	0.442827	-	5	13.1338	13.3057	12.7871	14.1978	14.1893
MARK2	-1.12069	0.005615	0.442827	-	5	11.8835	11.9075	11.6712	12.7765	13.1063
SND1	-1.12418	0.01767	0.442827	-	3	11.4771	NA	NA	12.6193	12.5833
RPIA	-1.13102	0.0364	0.442827	-	5	9.37108	8.61056	9.08714	10.3231	9.98479
NAPA	-1.14754	0.02976	0.442827	-	5	8.37267	8.67067	8.95963	10.078	9.55238
DNAJC8	-1.15583	0.0365	0.442827	-	5	12.4445	11.9885	11.5861	13.1645	13.1598
HNRNPA1	-1.16586	0.02808	0.442827	-	5	11.2874	10.5503	10.7519	12.119	11.9392
SLK	-1.16698	0.005163	0.442827	-	5	12.596	12.2683	12.4594	13.7425	13.4739
PGM3	-1.21284	0.02984	0.442827	-	5	11.7207	11.4904	11.9534	13.2809	12.5878
SRP14	-1.21393	0.04711	0.466757	-	3	7.43247	NA	NA	8.69835	8.59444
RPS8	-1.22369	0.01852	0.442827	-	5	11.3213	11.1075	10.9018	12.6159	12.0519
BPGM	-1.23163	0.004874	0.442827	-	5	10.2535	10.3232	9.91318	11.4074	11.3825
APRT	-1.23871	0.02434	0.442827	-	5	12.5687	11.7984	12.2752	13.5162	13.3894
EFHD2	-1.24216	0.0358	0.442827	-	5	15.6745	15.4305	14.8786	16.7789	16.3611
ASL	-1.24751	0.04759	0.468192	-	5	12.4481	11.9492	11.4175	13.178	13.1936
VPS35	-1.25294	0.04113	0.446718	-	5	10.4362	9.85689	10.2059	11.8107	11.0278
HMGN2	-1.28392	0.01202	0.442827	-	5	13.7727	13.2266	13.2344	14.6606	14.7297
HIP1	-1.38615	0.01466	0.442827	-	5	10.9781	11.0197	10.5547	12.4964	11.9775
PSMA4	-1.38869	0.02174	0.442827	-	5	13.04	12.3908	13.1514	14.3517	14.1472
PAFAH1B3	-1.39193	0.007082	0.442827	-	5	9.36665	9.92548	9.67411	11.089	11.0057
HCK	-1.4586	0.02856	0.442827	-	5	12.2614	11.3866	11.7398	13.4764	13.0326
ANP32A	-1.50781	0.01985	0.442827	-	5	14.4825	13.6084	13.9755	15.5987	15.4612
CAPZB	-1.53509	0.01339	0.442827	-	5	14.9445	14.7034	14.2187	16.0282	16.2864
FCN1	-1.57032	0.01025	0.442827	-	5	12.9068	12.5131	13.2231	14.3746	14.528
LRRFIP1	-1.65409	0.02171	0.442827	-	5	13.8365	13.2592	12.8628	15.0929	14.8543
HK1	-1.70623	0.04643	0.466638	-	5	12.2916	10.9511	11.4371	13.4292	13.1031
FEN1	-1.71466	0.04598	0.466638	-	5	11.8316	12.4155	11.1342	13.7851	13.2317
LSM4	-1.72322	0.002673	0.442827	-	3	8.7112	NA	NA	10.4386	10.4302
WARS1	-1.83534	0.04268	0.451697	-	5	14.5109	13.9677	13.3053	16.1659	15.3608
HSD17B4	-2.46976	0.04133	0.446718	-	5	10.2782	9.12182	8.451	12.0278	11.4791
RPL10A	-2.57387	0.03515	0.442827	-	5	11.8373	10.6518	9.97903	13.4528	13.3404
CORO7	-2.65608	0.03506	0.442827	-	5	10.9742	9.29156	10.5012	13.3489	12.4746

## Sheet: A_D
Accession	Gene	Description	Mw(kDa)	Corrected A/D	log2 A/D	P-value	P.adjust	Diff Sig	Count	10	2	3	1	4	9
P01743	IGHV1-46	Immunoglobulin heavy variable 1-46 OS=Homo sapiens OX=9606 GN=IGHV1-46 PE=1 SV=2	12.933	3.72354	1.89668	0.02712	0.998873	+	6	14.6063	12.9197	13.8911	11.828	11.4928	12.4063
P01706	IGLV2-11	Immunoglobulin lambda variable 2-11 OS=Homo sapiens OX=9606 GN=IGLV2-11 PE=1 SV=2	12.644	3.11264	1.63814	0.006086	0.998873	+	6	15.2311	15.2361	14.8649	13.8579	12.9195	13.6402
P04211	IGLV7-43	Immunoglobulin lambda variable 7-43 OS=Homo sapiens OX=9606 GN=IGLV7-43 PE=3 SV=2	12.451	2.41306	1.27086	0.04555	0.998873	+	6	16.4268	15.1267	16.0259	14.8336	14.1491	14.7841
P0DOY2	IGLC2	Immunoglobulin lambda constant 2 OS=Homo sapiens OX=9606 GN=IGLC2 PE=1 SV=1	11.294	2.39673	1.26107	0.02961	0.998873	+	6	17.5806	16.6366	17.4804	15.9963	15.552	16.3661
P06312	IGKV4-1	Immunoglobulin kappa variable 4-1 OS=Homo sapiens OX=9606 GN=IGKV4-1 PE=1 SV=1	13.38	2.07775	1.05502	0.04612	0.998873	+	6	13.0919	12.9873	14.1436	12.3308	12.3675	12.3594
E9PRR2	PRSS23	Serine protease 23 (Fragment) OS=Homo sapiens OX=9606 GN=PRSS23 PE=1 SV=1	16.944	2.06148	1.04368	0.04742	0.998873	+	4	NA	12.038	11.8023	11.0807	10.6723	NA
P02675	FGB	Fibrinogen beta chain OS=Homo sapiens OX=9606 GN=FGB PE=1 SV=2	55.928	1.90957	0.933246	0.0007791	0.998873	+	6	16.0307	16.3589	16.2109	15.3382	15.22	15.2425
C9JEU5	FGG	Fibrinogen gamma chain OS=Homo sapiens OX=9606 GN=FGG PE=1 SV=1	50.323	1.89595	0.922919	0.04955	0.998873	+	6	16.0035	16.1188	16.7011	15.6755	15.5224	14.8566
S4R3V8	LSR	Lipolysis-stimulated lipoprotein receptor OS=Homo sapiens OX=9606 GN=LSR PE=1 SV=2	66.176	1.83369	0.874753	0.01671	0.998873	+	6	14.966	14.6545	14.6308	13.7272	13.6416	14.2582
Q8WWA1	TMEM40	Transmembrane protein 40 OS=Homo sapiens OX=9606 GN=TMEM40 PE=1 SV=2	25.495	1.83288	0.874115	0.01926	0.998873	+	4	NA	12.2024	12.4323	11.3992	11.4873	NA
Q14118	DAG1	Dystroglycan OS=Homo sapiens OX=9606 GN=DAG1 PE=1 SV=2	97.441	1.74459	0.802891	0.03108	0.998873	+	6	14.165	13.5678	13.9613	12.9941	12.8589	13.4323
Q96BQ1	FAM3D	Protein FAM3D OS=Homo sapiens OX=9606 GN=FAM3D PE=1 SV=1	24.963	1.5943	0.67292	0.03185	0.998873	+	6	16.8612	16.3133	16.3553	15.6189	15.9811	15.911
A0A1B0GWI2	CLN5	Ceroid-lipofuscinosis neuronal protein 5 (Fragment) OS=Homo sapiens OX=9606 GN=CLN5 PE=1 SV=1	35.556	1.57009	0.650852	0.0443	0.998873	+	6	15.8355	15.4311	16.0027	14.8718	15.0671	15.378
A0A1B0GV23	CTSD	Cathepsin D OS=Homo sapiens OX=9606 GN=CTSD PE=1 SV=1	43.831	1.51519	0.599503	0.0203	0.998873	+	6	16.7912	17.2663	17.0452	16.4234	16.585	16.2958
Q96G03	PGM2	Phosphoglucomutase-2 OS=Homo sapiens OX=9606 GN=PGM2 PE=1 SV=4	68.283	0.823489	-0.280179	0.03662	0.998873	-	6	14.5079	14.3856	14.6005	14.6462	14.8421	14.8461
A0A3B3IRW2	MOGS	Mannosyl-oligosaccharide glucosidase OS=Homo sapiens OX=9606 GN=MOGS PE=1 SV=1	62.249	0.816103	-0.293176	0.03119	0.998873	-	4	NA	11.506	11.6099	11.8617	11.8405	NA
Q16666	IFI16	Gamma-interferon-inducible protein 16 OS=Homo sapiens OX=9606 GN=IFI16 PE=1 SV=3	88.256	0.814603	-0.295831	0.02702	0.998873	-	4	NA	9.29775	9.19869	9.54734	9.54077	NA
Q9Y266	NUDC	Nuclear migration protein nudC OS=Homo sapiens OX=9606 GN=NUDC PE=1 SV=1	38.243	0.788538	-0.342748	0.03524	0.998873	-	6	11.3138	11.5779	11.4342	11.701	11.9418	11.7113
P14866	HNRNPL	Heterogeneous nuclear ribonucleoprotein L OS=Homo sapiens OX=9606 GN=HNRNPL PE=1 SV=2	64.133	0.728577	-0.456847	0.02562	0.998873	-	6	11.1372	11.016	10.9696	11.2656	11.5495	11.6782
P07738	BPGM	Bisphosphoglycerate mutase OS=Homo sapiens OX=9606 GN=BPGM PE=1 SV=2	30.005	0.709027	-0.496088	0.03369	0.998873	-	6	10.2535	10.3232	9.91318	10.4783	10.7724	10.7275
Q16222	UAP1	UDP-N-acetylhexosamine pyrophosphorylase OS=Homo sapiens OX=9606 GN=UAP1 PE=1 SV=3	58.769	0.707012	-0.500193	0.03116	0.998873	-	6	10.5825	10.5743	10.9978	11.1572	11.1526	11.3453
E7ETY4	MARK2	Non-specific serine/threonine protein kinase OS=Homo sapiens OX=9606 GN=MARK2 PE=1 SV=1	78.453	0.700515	-0.513512	0.03056	0.998873	-	6	11.8835	11.9075	11.6712	12.2191	12.1756	12.6081
B8ZZ54	HSPE1	10 kDa heat shock protein, mitochondrial OS=Homo sapiens OX=9606 GN=HSPE1 PE=1 SV=1	5.19	0.678003	-0.560637	0.00232	0.998873	-	6	13.3784	13.3066	13.2529	13.803	13.7981	14.0187
P21128	ENDOU	Poly(U)-specific endoribonuclease OS=Homo sapiens OX=9606 GN=ENDOU PE=1 SV=2	46.872	0.647266	-0.627569	0.00568	0.998873	-	6	13.744	13.768	13.6505	14.1314	14.493	14.4209
Q96K76	USP47	Ubiquitin carboxyl-terminal hydrolase 47 OS=Homo sapiens OX=9606 GN=USP47 PE=1 SV=3	157.311	0.634827	-0.655564	0.04109	0.998873	-	4	NA	7.89605	7.6343	8.46172	8.37976	NA
P12830	CDH1	Cadherin-1 OS=Homo sapiens OX=9606 GN=CDH1 PE=1 SV=3	97.456	0.621091	-0.687123	0.004275	0.998873	-	6	12.906	12.897	12.5556	13.4336	13.5128	13.4737
F2Z3J9	PTGR1	15-oxoprostaglandin 13-reductase OS=Homo sapiens OX=9606 GN=PTGR1 PE=1 SV=3	32.729	0.592967	-0.753977	0.007814	0.998873	-	6	14.0344	14.0169	14.4419	14.9126	15.0309	14.8116
H0YN18	PSMA4	Proteasome endopeptidase complex OS=Homo sapiens OX=9606 GN=PSMA4 PE=1 SV=1	26.282	0.535164	-0.901947	0.03832	0.998873	-	6	13.04	12.3908	13.1514	13.4332	14.0438	13.8111
F5H4B6	ALDH16A1	Aldehyde dehydrogenase family 16 member A1 OS=Homo sapiens OX=9606 GN=ALDH16A1 PE=1 SV=1	67.153	0.49243	-1.02201	0.03182	0.998873	-	6	11.1403	11.4583	11.8901	12.5379	12.9052	12.1115
Q9NZT1	CALML5	Calmodulin-like protein 5 OS=Homo sapiens OX=9606 GN=CALML5 PE=1 SV=2	15.893	0.417515	-1.2601	0.04944	0.998873	-	6	13.5547	14.4346	12.9499	14.6824	15.1527	14.8844
E9PN89	HSPA8	Heat shock cognate 71 kDa protein (Fragment) OS=Homo sapiens OX=9606 GN=HSPA8 PE=1 SV=1	34.819	0.379425	-1.39811	0.04654	0.998873	-	6	10.5226	10.4315	11.5326	12.8772	11.7201	12.0838

## Sheet: B_C
Accession	Gene	Description	Mw(kDa)	Corrected B/C	log2 B/C	P-value	P.adjust	Diff Sig	Count	5	7	6	8
P31944	CASP14	Caspase-14 OS=Homo sapiens OX=9606 GN=CASP14 PE=1 SV=2	27.68	4.3183	2.11046	0.04963	0.907392	+	4	14.3808	15.2258	12.9381	12.4476
Q9UBG3	CRNN	Cornulin OS=Homo sapiens OX=9606 GN=CRNN PE=1 SV=1	53.533	2.80423	1.4876	0.01488	0.907392	+	4	14.7083	14.9435	13.4792	13.1973
P00918	CA2	Carbonic anhydrase 2 OS=Homo sapiens OX=9606 GN=CA2 PE=1 SV=2	29.246	2.79149	1.48104	0.01182	0.907392	+	4	15.3918	15.3629	14.0581	13.7345
A0A075B727	PECAM1	Platelet endothelial cell adhesion molecule (Fragment) OS=Homo sapiens OX=9606 GN=PECAM1 PE=1 SV=1	26.219	2.50707	1.326	0.04198	0.907392	+	3	NA	9.66979	8.39434	8.29323
Q9UBC9	SPRR3	Small proline-rich protein 3 OS=Homo sapiens OX=9606 GN=SPRR3 PE=1 SV=2	18.154	2.20971	1.14385	0.004645	0.852775	+	4	17.0719	17.1472	15.8971	16.0342
O60701	UGDH	UDP-glucose 6-dehydrogenase OS=Homo sapiens OX=9606 GN=UGDH PE=1 SV=1	55.024	2.07864	1.05564	0.002462	0.77224	+	4	11.7464	11.8064	10.6777	10.7638
P35241	RDX	Radixin OS=Homo sapiens OX=9606 GN=RDX PE=1 SV=1	68.564	2.04712	1.0336	0.04535	0.907392	+	4	11.5076	11.0942	10.3634	10.1712
O95716	RAB3D	Ras-related protein Rab-3D OS=Homo sapiens OX=9606 GN=RAB3D PE=1 SV=1	24.267	1.98532	0.98937	0.005761	0.896156	+	4	13.6488	13.5238	12.6392	12.5547
A0A140T8Z0	DIAPH1	Protein diaphanous homolog 1 OS=Homo sapiens OX=9606 GN=DIAPH1 PE=1 SV=1	140.3	1.79975	0.847795	0.01087	0.907392	+	3	NA	12.8612	12.0218	12.005
P10644	PRKAR1A	cAMP-dependent protein kinase type I-alpha regulatory subunit OS=Homo sapiens OX=9606 GN=PRKAR1A PE=1 SV=1	42.982	1.71513	0.778321	0.002758	0.77224	+	4	14.3049	14.3125	13.4896	13.5712
B8ZZ54	HSPE1	10 kDa heat shock protein, mitochondrial OS=Homo sapiens OX=9606 GN=HSPE1 PE=1 SV=1	5.19	1.60067	0.678673	0.00188	0.77224	+	4	14.2333	14.2262	13.5218	13.5803
A0A0U1RQT1	ACAP2	Arf-GAP with coiled-coil, ANK repeat and PH domain-containing protein 2 (Fragment) OS=Homo sapiens OX=9606 GN=ACAP2 PE=1 SV=1	62.842	1.54637	0.628885	0.01307	0.907392	+	3	NA	8.84855	8.2122	8.22712
Q13177	PAK2	Serine/threonine-protein kinase PAK 2 OS=Homo sapiens OX=9606 GN=PAK2 PE=1 SV=3	58.043	1.46061	0.546573	0.03386	0.907392	+	4	12.2581	12.2434	11.6012	11.8071
Q15075	EEA1	Early endosome antigen 1 OS=Homo sapiens OX=9606 GN=EEA1 PE=1 SV=2	162.466	1.44878	0.534835	0.01594	0.907392	+	3	NA	10.7464	10.2193	10.2038
M0QXB0	LSM4	U6 snRNA-associated Sm-like protein LSm4 OS=Homo sapiens OX=9606 GN=LSM4 PE=1 SV=1	7.83	1.4393	0.525363	0.008767	0.907392	+	3	NA	10.9598	10.4386	10.4302
J3KS22	DCXR	L-xylulose reductase (Fragment) OS=Homo sapiens OX=9606 GN=DCXR PE=1 SV=8	23.804	1.38488	0.469758	0.0216	0.907392	+	3	NA	13.131	12.6705	12.6521
Q9P035	HACD3	Very-long-chain (3R)-3-hydroxyacyl-CoA dehydratase 3 OS=Homo sapiens OX=9606 GN=HACD3 PE=1 SV=2	43.16	1.37938	0.46402	0.03294	0.907392	+	3	NA	10.403	9.95282	9.92507
E9PQD8	GATD1	Glutamine amidotransferase-like class 1 domain-containing protein 1 OS=Homo sapiens OX=9606 GN=GATD1 PE=1 SV=1	12.783	1.34161	0.423969	0.0375	0.907392	+	3	NA	11.3651	10.9556	10.9267
F5H6N1	MAGOHB	Protein mago nashi homolog 2 OS=Homo sapiens OX=9606 GN=MAGOHB PE=1 SV=1	10.715	0.776227	-0.365449	0.004668	0.852775	-	3	NA	11.6759	12.0398	12.0429
O14657	TOR1B	Torsin-1B OS=Homo sapiens OX=9606 GN=TOR1B PE=1 SV=2	37.979	0.706596	-0.501043	0.02992	0.907392	-	4	11.9754	12.0462	12.4305	12.5931
P02545	LMNA	Prelamin-A/C OS=Homo sapiens OX=9606 GN=LMNA PE=1 SV=1	74.139	0.69764	-0.519446	0.009594	0.907392	-	4	13.7175	13.6732	14.261	14.1686
Q9HD89	RETN	Resistin OS=Homo sapiens OX=9606 GN=RETN PE=1 SV=1	11.419	0.642345	-0.63858	0.04305	0.907392	-	3	NA	8.5685	9.23205	9.18211
P02760	AMBP	Protein AMBP OS=Homo sapiens OX=9606 GN=AMBP PE=1 SV=1	38.999	0.600812	-0.735015	0.02293	0.907392	-	3	NA	12.7817	13.532	13.5014
P59666	DEFA3	Neutrophil defensin 3 OS=Homo sapiens OX=9606 GN=DEFA3 PE=1 SV=1	10.245	0.568982	-0.813545	0.009093	0.907392	-	4	12.2938	12.3444	13.2066	13.0588
Q9GZM7	TINAGL1	Tubulointerstitial nephritis antigen-like OS=Homo sapiens OX=9606 GN=TINAGL1 PE=1 SV=1	52.387	0.533843	-0.905512	0.01755	0.907392	-	3	NA	7.89927	8.8192	8.79036
P62805	H4C1	Histone H4 OS=Homo sapiens OX=9606 GN=H4C1 PE=1 SV=2	11.367	0.526323	-0.925979	0.004873	0.852775	-	4	14.0171	14.1229	14.9585	15.0336
A0A2R8YDF1	BPI	Bactericidal permeability-increasing protein OS=Homo sapiens OX=9606 GN=BPI PE=1 SV=2	53.369	0.47722	-1.06727	0.02323	0.907392	-	4	13.4604	13.7836	14.6532	14.7253
O00602	FCN1	Ficolin-1 OS=Homo sapiens OX=9606 GN=FCN1 PE=1 SV=2	35.078	0.458161	-1.12607	0.02321	0.907392	-	4	13.1684	13.4821	14.3746	14.528
Q9NQR4	NIT2	Omega-amidase NIT2 OS=Homo sapiens OX=9606 GN=NIT2 PE=1 SV=1	30.608	0.450067	-1.15179	0.03377	0.907392	-	4	14.475	14.5765	15.8887	15.4663
J3KMY5	NPC2	Epididymal secretory protein E1 OS=Homo sapiens OX=9606 GN=NPC2 PE=1 SV=1	16.23	0.440991	-1.18118	0.01108	0.907392	-	4	13.6517	13.89	14.9912	14.9129
O15335	CHAD	Chondroadherin OS=Homo sapiens OX=9606 GN=CHAD PE=1 SV=2	40.476	0.429898	-1.21793	0.02499	0.907392	-	3	NA	10.2073	11.3977	11.4529
P01871	IGHM	Immunoglobulin heavy constant mu OS=Homo sapiens OX=9606 GN=IGHM PE=1 SV=4	49.44	0.400694	-1.31943	0.03551	0.907392	-	4	15.3367	15.4257	16.449	16.9522
A0A087WY82	F11R	Junctional adhesion molecule 1 OS=Homo sapiens OX=9606 GN=F11R PE=1 SV=1	30.197	0.367949	-1.44242	0.02604	0.907392	-	3	NA	11.4184	12.8949	12.8268
E7EQB2	LTF	Lactotransferrin (Fragment) OS=Homo sapiens OX=9606 GN=LTF PE=1 SV=1	76.626	0.34865	-1.52015	0.0167	0.907392	-	4	16.5794	16.6954	17.9672	18.3478
B4DFW2	TIMP2	Metalloproteinase inhibitor 2 OS=Homo sapiens OX=9606 GN=TIMP2 PE=1 SV=1	16.082	0.307068	-1.70337	0.0003214	0.44996	-	4	10.6374	10.6954	12.3601	12.3794

## Sheet: B_D
Accession	Gene	Description	Mw(kDa)	Corrected B/D	log2 B/D	P-value	P.adjust	Diff Sig	Count	5	7	1	4	9
Q5EG05	CARD16	Caspase recruitment domain-containing protein 16 OS=Homo sapiens OX=9606 GN=CARD16 PE=1 SV=1	22.625	3.76282	1.91181	0.04467	0.998949	+	5	13.1759	14.0356	10.9812	11.886	12.2146
H0YNP1	GLCE	Heparosan-N-sulfate-glucuronate 5-epimerase OS=Homo sapiens OX=9606 GN=GLCE PE=1 SV=1	62.887	2.6061	1.38189	0.03235	0.998949	+	3	10.8139	NA	9.47258	9.39143	NA
P68371	TUBB4B	Tubulin beta-4B chain OS=Homo sapiens OX=9606 GN=TUBB4B PE=1 SV=1	49.831	2.1507	1.1048	0.006536	0.998949	+	3	12.2494	NA	11.138	11.1511	NA
C9JEU5	FGG	Fibrinogen gamma chain OS=Homo sapiens OX=9606 GN=FGG PE=1 SV=1	50.323	2.14777	1.10284	0.04316	0.998949	+	5	16.4061	16.5026	15.6755	15.5224	14.8566
P02751	FN1	Fibronectin OS=Homo sapiens OX=9606 GN=FN1 PE=1 SV=5	272.32	2.08661	1.06116	0.03888	0.998949	+	5	16.6585	16.5869	15.6165	15.1341	15.9339
P14317	HCLS1	Hematopoietic lineage cell-specific protein OS=Homo sapiens OX=9606 GN=HCLS1 PE=1 SV=3	54.014	2.06389	1.04537	0.01231	0.998949	+	5	13.9831	14.3812	13.2007	12.9492	13.2605
P34059	GALNS	N-acetylgalactosamine-6-sulfatase OS=Homo sapiens OX=9606 GN=GALNS PE=1 SV=1	58.026	1.97244	0.979982	0.02886	0.998949	+	5	13.6751	13.0803	12.5686	12.326	12.2985
P56377	AP1S2	AP-1 complex subunit sigma-2 OS=Homo sapiens OX=9606 GN=AP1S2 PE=1 SV=1	18.615	1.92448	0.944472	0.02719	0.998949	+	3	10.7189	NA	9.75117	9.79777	NA
Q9H4E7	DEF6	Differentially expressed in FDCP 6 homolog OS=Homo sapiens OX=9606 GN=DEF6 PE=1 SV=1	73.91	1.87308	0.905413	0.03408	0.998949	+	5	10.9295	10.9434	9.70768	10.3625	10.023
O60701	UGDH	UDP-glucose 6-dehydrogenase OS=Homo sapiens OX=9606 GN=UGDH PE=1 SV=1	55.024	1.81733	0.861819	0.0002078	0.268062	+	5	11.7464	11.8064	10.8655	10.9304	10.9478
Q15555	MAPRE2	Microtubule-associated protein RP/EB family member 2 OS=Homo sapiens OX=9606 GN=MAPRE2 PE=1 SV=1	37.031	1.75391	0.810574	0.01398	0.998949	+	5	11.8989	12.1346	11.0568	11.1648	11.3971
Q16666	IFI16	Gamma-interferon-inducible protein 16 OS=Homo sapiens OX=9606 GN=IFI16 PE=1 SV=3	88.256	1.70499	0.769763	0.004704	0.998949	+	3	10.3138	NA	9.54734	9.54077	NA
P46459	NSF	Vesicle-fusing ATPase OS=Homo sapiens OX=9606 GN=NSF PE=1 SV=3	82.594	1.66045	0.731572	0.03521	0.998949	+	5	11.9399	12.3125	11.4108	11.1943	11.5788
H7BZH6	TP53I3	Quinone oxidoreductase PIG3 (Fragment) OS=Homo sapiens OX=9606 GN=TP53I3 PE=1 SV=1	22.654	1.65399	0.72595	0.001856	0.79808	+	5	12.7547	12.5867	11.986	11.9417	11.9065
P13804	ETFA	Electron transfer flavoprotein subunit alpha, mitochondrial OS=Homo sapiens OX=9606 GN=ETFA PE=1 SV=1	35.08	1.65132	0.723619	0.04473	0.998949	+	5	12.6348	12.7712	11.6902	11.9911	12.2568
Q9BV40	VAMP8	Vesicle-associated membrane protein 8 OS=Homo sapiens OX=9606 GN=VAMP8 PE=1 SV=1	11.438	1.62814	0.703223	0.04741	0.998949	+	5	13.031	13.5735	12.4834	12.6337	12.6801
P16930	FAH	Fumarylacetoacetase OS=Homo sapiens OX=9606 GN=FAH PE=1 SV=2	46.374	1.62337	0.698988	0.01047	0.998949	+	5	14.4598	14.1735	13.5615	13.5842	13.7072
O14672	ADAM10	Disintegrin and metalloproteinase domain-containing protein 10 OS=Homo sapiens OX=9606 GN=ADAM10 PE=1 SV=1	84.142	1.58447	0.664004	0.0169	0.998949	+	3	11.7561	NA	11.082	11.1023	NA
O00757	FBP2	Fructose-1,6-bisphosphatase isozyme 2 OS=Homo sapiens OX=9606 GN=FBP2 PE=1 SV=2	36.743	1.52292	0.606839	0.02039	0.998949	+	3	12.7206	NA	12.125	12.1025	NA
A0A087WSY5	CPB2	Carboxypeptidase B2 OS=Homo sapiens OX=9606 GN=CPB2 PE=1 SV=1	44.022	1.52088	0.604907	0.0428	0.998949	+	3	12.3308	NA	11.7024	11.7494	NA
P02675	FGB	Fibrinogen beta chain OS=Homo sapiens OX=9606 GN=FGB PE=1 SV=2	55.928	1.51594	0.600216	0.002761	0.890423	+	5	15.9288	15.8054	15.3382	15.22	15.2425
Q9BRT3	MIEN1	Migration and invasion enhancer 1 OS=Homo sapiens OX=9606 GN=MIEN1 PE=1 SV=1	12.403	1.47179	0.557571	0.03404	0.998949	+	5	12.1478	12.4022	11.6675	11.592	11.8927
C9JGI3	TYMP	Thymidine phosphorylase (Fragment) OS=Homo sapiens OX=9606 GN=TYMP PE=1 SV=1	46.087	1.40099	0.486443	0.04185	0.998949	+	5	14.8852	14.9405	14.209	14.52	14.5501
P31150	GDI1	Rab GDP dissociation inhibitor alpha OS=Homo sapiens OX=9606 GN=GDI1 PE=1 SV=2	50.583	1.38325	0.468057	0.04304	0.998949	+	5	14.9678	14.7249	14.3017	14.5404	14.2926
P04083	ANXA1	Annexin A1 OS=Homo sapiens OX=9606 GN=ANXA1 PE=1 SV=2	38.714	1.30479	0.383814	0.02214	0.998949	+	5	16.0959	15.9348	15.7306	15.587	15.577
B8ZZ54	HSPE1	10 kDa heat shock protein, mitochondrial OS=Homo sapiens OX=9606 GN=HSPE1 PE=1 SV=1	5.19	1.28029	0.356466	0.03211	0.998949	+	5	14.2333	14.2262	13.803	13.7981	14.0187
B1AH49	MPST	3-mercaptopyruvate sulfurtransferase OS=Homo sapiens OX=9606 GN=MPST PE=1 SV=1	24.982	1.23307	0.302251	0.0004277	0.275867	+	5	12.3319	12.3783	12.0516	12.0496	12.0574
P17066	HSPA6	Heat shock 70 kDa protein 6 OS=Homo sapiens OX=9606 GN=HSPA6 PE=1 SV=2	71.028	1.21649	0.282726	0.007831	0.998949	+	5	14.4332	14.3378	14.0722	14.1419	14.0943
Q14703	MBTPS1	Membrane-bound transcription factor site-1 protease OS=Homo sapiens OX=9606 GN=MBTPS1 PE=1 SV=1	117.749	0.68457	-0.54673	0.01603	0.998949	-	3	8.2503	NA	8.80498	8.78908	NA
A0A3B3IRW2	MOGS	Mannosyl-oligosaccharide glucosidase OS=Homo sapiens OX=9606 GN=MOGS PE=1 SV=1	62.249	0.648779	-0.6242	0.01875	0.998949	-	3	11.2269	NA	11.8617	11.8405	NA
O95544	NADK	NAD kinase OS=Homo sapiens OX=9606 GN=NADK PE=1 SV=1	49.228	0.609191	-0.715034	0.01331	0.998949	-	5	11.3093	11.5227	12.1269	12.2805	11.9857
P48723	HSPA13	Heat shock 70 kDa protein 13 OS=Homo sapiens OX=9606 GN=HSPA13 PE=1 SV=1	51.927	0.533486	-0.906478	0.02773	0.998949	-	5	12.1776	11.6306	12.9479	12.6891	12.7948
Q99538	LGMN	Legumain OS=Homo sapiens OX=9606 GN=LGMN PE=1 SV=1	49.411	0.474369	-1.07592	0.03574	0.998949	-	5	12.4576	11.8808	13.4978	13.2806	12.9569
P45877	PPIC	Peptidyl-prolyl cis-trans isomerase C OS=Homo sapiens OX=9606 GN=PPIC PE=1 SV=1	22.763	0.399849	-1.32247	0.008662	0.998949	-	5	10.4497	9.88185	11.4321	11.5346	11.498
H3BTN5	PKM	Pyruvate kinase (Fragment) OS=Homo sapiens OX=9606 GN=PKM PE=1 SV=1	53.045	0.397183	-1.33212	0.02221	0.998949	-	3	10.9575	NA	12.2628	12.3165	NA
P09228	CST2	Cystatin-SA OS=Homo sapiens OX=9606 GN=CST2 PE=1 SV=1	16.445	0.354515	-1.49608	0.03511	0.998949	-	5	12.2773	12.217	14.1057	14.0097	13.1143
B8ZZQ6	PTMA	Prothymosin alpha OS=Homo sapiens OX=9606 GN=PTMA PE=1 SV=1	11.759	0.239668	-2.06089	0.0317	0.998949	-	3	8.65239	NA	10.7726	10.654	NA
Q7Z5R6	APBB1IP	Amyloid beta A4 precursor protein-binding family B member 1-interacting protein OS=Homo sapiens OX=9606 GN=APBB1IP PE=1 SV=1	73.183	0.110964	-3.17183	0.03431	0.998949	-	3	10.7062	NA	13.9768	13.7793	NA

## Sheet: C_D
Accession	Gene	Description	Mw(kDa)	Corrected C/D	log2 C/D	P-value	P.adjust	Diff Sig	Count	6	8	1	4	9
P08133	ANXA6	Annexin A6 OS=Homo sapiens OX=9606 GN=ANXA6 PE=1 SV=3	75.873	4.62893	2.21068	0.04621	0.623645	+	5	15.9163	15.0602	12.9821	12.673	14.1776
A0A2R8YDT8	HSD17B4	Peroxisomal multifunctional enzyme type 2 (Fragment) OS=Homo sapiens OX=9606 GN=HSD17B4 PE=1 SV=1	17.825	4.23657	2.0829	0.009393	0.623645	+	5	12.0278	11.4791	9.48221	9.42256	10.1068
H0YLA2	SRP14	Signal recognition particle 14 kDa protein OS=Homo sapiens OX=9606 GN=SRP14 PE=1 SV=1	13.058	3.80964	1.92966	0.02967	0.623645	+	3	8.69835	8.59444	NA	NA	6.71674
P57737	CORO7	Coronin-7 OS=Homo sapiens OX=9606 GN=CORO7 PE=1 SV=2	100.605	3.75866	1.91022	0.04914	0.623645	+	5	13.3489	12.4746	10.8056	10.4518	11.7472
P27695	APEX1	DNA-(apurinic or apyrimidinic site) endonuclease OS=Homo sapiens OX=9606 GN=APEX1 PE=1 SV=2	35.555	3.48484	1.80109	0.02897	0.623645	+	5	14.7866	14.905	12.6297	12.7604	13.744
O95497	VNN1	Pantetheinase OS=Homo sapiens OX=9606 GN=VNN1 PE=1 SV=2	57.012	3.35976	1.74836	0.01462	0.623645	+	5	12.6544	12.9386	10.547	11.2403	11.3571
P02671	FGA	Fibrinogen alpha chain OS=Homo sapiens OX=9606 GN=FGA PE=1 SV=2	94.973	3.34709	1.74291	0.0211	0.623645	+	5	17.1422	17.2836	15.5726	14.9058	15.9316
P23381	WARS1	Tryptophan--tRNA ligase, cytoplasmic OS=Homo sapiens OX=9606 GN=WARS1 PE=1 SV=2	53.165	3.20476	1.68021	0.03766	0.623645	+	5	16.1659	15.3608	13.5204	14.3735	14.3555
O00602	FCN1	Ficolin-1 OS=Homo sapiens OX=9606 GN=FCN1 PE=1 SV=2	35.078	2.98198	1.57627	0.03723	0.623645	+	5	14.3746	14.528	13.1739	12.2006	13.2507
P05204	HMGN2	Non-histone chromosomal protein HMG-17 OS=Homo sapiens OX=9606 GN=HMGN2 PE=1 SV=3	9.393	2.86907	1.52058	0.0001382	0.193342	+	5	14.6606	14.7297	13.1284	13.2593	13.136
E7EQB2	LTF	Lactotransferrin (Fragment) OS=Homo sapiens OX=9606 GN=LTF PE=1 SV=1	76.626	2.80752	1.4893	0.03046	0.623645	+	5	17.9672	18.3478	16.5252	16.2765	17.2029
P16403	H1-2	Histone H1.2 OS=Homo sapiens OX=9606 GN=H1-2 PE=1 SV=2	21.365	2.78095	1.47558	0.0135	0.623645	+	5	14.7706	14.6712	13.1223	12.9481	13.6656
H0YN26	ANP32A	Acidic leucine-rich nuclear phosphoprotein 32 family member A OS=Homo sapiens OX=9606 GN=ANP32A PE=1 SV=1	19.997	2.65396	1.40815	0.03842	0.623645	+	5	15.5987	15.4612	13.7177	13.9264	14.7213
Q9H8S9	MOB1A	MOB kinase activator 1A OS=Homo sapiens OX=9606 GN=MOB1A PE=1 SV=4	25.08	2.59924	1.37809	0.01716	0.623645	+	5	11.6827	11.4983	9.78215	10.4548	10.4003
P06702	S100A9	Protein S100-A9 OS=Homo sapiens OX=9606 GN=S100A9 PE=1 SV=1	13.242	2.42696	1.27915	0.03001	0.623645	+	5	17.4249	17.3037	16.5889	15.8416	15.825
A6NC48	BST1	ADP-ribosyl cyclase/cyclic ADP-ribose hydrolase OS=Homo sapiens OX=9606 GN=BST1 PE=1 SV=1	37.482	2.34186	1.22766	0.03319	0.623645	+	5	14.0781	13.9242	12.4474	13.2645	12.6085
P55008	AIF1	Allograft inflammatory factor 1 OS=Homo sapiens OX=9606 GN=AIF1 PE=1 SV=1	16.703	2.32537	1.21746	0.0192	0.623645	+	5	14.5324	14.5565	13.0508	13.2039	13.7262
P02787	TF	Serotransferrin OS=Homo sapiens OX=9606 GN=TF PE=1 SV=3	77.064	2.3056	1.20514	0.03135	0.623645	+	5	18.0909	18.6063	17.4244	16.7738	17.2322
P04217	A1BG	Alpha-1B-glycoprotein OS=Homo sapiens OX=9606 GN=A1BG PE=1 SV=4	54.254	2.22673	1.15492	0.0388	0.623645	+	5	15.1023	15.1463	13.8142	13.6289	14.465
A0A5F9ZHM8	ASL	Argininosuccinate lyase (Fragment) OS=Homo sapiens OX=9606 GN=ASL PE=1 SV=1	38.707	2.18976	1.13077	0.03315	0.623645	+	5	13.178	13.1936	11.7403	11.9133	12.5115
P01859	IGHG2	Immunoglobulin heavy constant gamma 2 OS=Homo sapiens OX=9606 GN=IGHG2 PE=1 SV=2	35.901	2.13171	1.09201	0.03542	0.623645	+	5	16.9151	16.4846	15.9819	15.3228	15.5189
P41218	MNDA	Myeloid cell nuclear differentiation antigen OS=Homo sapiens OX=9606 GN=MNDA PE=1 SV=1	45.836	2.1306	1.09126	0.04441	0.623645	+	5	15.5834	15.7273	14.4767	14.182	15.0336
M0QZT2	PAFAH1B3	Platelet-activating factor acetylhydrolase IB subunit gamma (Fragment) OS=Homo sapiens OX=9606 GN=PAFAH1B3 PE=1 SV=8	15.545	2.10521	1.07396	0.003431	0.623645	+	5	11.089	11.0057	9.91914	10.1582	9.84284
P22894	MMP8	Neutrophil collagenase OS=Homo sapiens OX=9606 GN=MMP8 PE=1 SV=1	53.412	2.08101	1.05728	0.01492	0.623645	+	5	15.7939	15.2951	14.3407	14.5404	14.5804
P02675	FGB	Fibrinogen beta chain OS=Homo sapiens OX=9606 GN=FGB PE=1 SV=2	55.928	2.06083	1.04322	0.01095	0.623645	+	5	16.0707	16.5496	15.3382	15.22	15.2425
P05114	HMGN1	Non-histone chromosomal protein HMG-14 OS=Homo sapiens OX=9606 GN=HMGN1 PE=1 SV=3	10.659	2.04718	1.03364	0.006128	0.623645	+	5	13.4036	13.1865	12.0679	12.3519	12.3644
P11215	ITGAM	Integrin alpha-M OS=Homo sapiens OX=9606 GN=ITGAM PE=1 SV=2	127.179	2.04474	1.03191	0.03723	0.623645	+	5	13.3459	13.3435	11.9859	12.2132	12.7394
Q96C19	EFHD2	EF-hand domain-containing protein D2 OS=Homo sapiens OX=9606 GN=EFHD2 PE=1 SV=1	26.697	2.01407	1.01011	0.02227	0.623645	+	5	16.7789	16.3611	15.2971	15.6586	15.7241
C9JGI3	TYMP	Thymidine phosphorylase (Fragment) OS=Homo sapiens OX=9606 GN=TYMP PE=1 SV=1	46.087	2.00658	1.00474	0.02911	0.623645	+	5	15.7163	15.146	14.209	14.52	14.5501
P26447	S100A4	Protein S100-A4 OS=Homo sapiens OX=9606 GN=S100A4 PE=1 SV=1	11.729	2.00352	1.00253	0.007651	0.623645	+	5	14.9951	14.6048	13.8848	13.7608	13.7467
P42331	ARHGAP25	Rho GTPase-activating protein 25 OS=Homo sapiens OX=9606 GN=ARHGAP25 PE=1 SV=2	73.435	1.93022	0.948764	0.04252	0.623645	+	5	14.1978	14.1893	12.827	13.3568	13.5505
P46459	NSF	Vesicle-fusing ATPase OS=Homo sapiens OX=9606 GN=NSF PE=1 SV=3	82.594	1.9271	0.946435	0.02684	0.623645	+	5	12.5868	12.0953	11.4108	11.1943	11.5788
P62993	GRB2	Growth factor receptor-bound protein 2 OS=Homo sapiens OX=9606 GN=GRB2 PE=1 SV=1	25.206	1.92195	0.942572	0.004515	0.623645	+	5	15.3101	15.5872	14.4492	14.6066	14.4625
P05164	MPO	Myeloperoxidase OS=Homo sapiens OX=9606 GN=MPO PE=1 SV=1	83.869	1.89646	0.923306	0.04251	0.623645	+	5	16.48	16.6261	15.9096	15.2276	15.7521
H0YGF3	PRPF19	Pre-mRNA-processing factor 19 (Fragment) OS=Homo sapiens OX=9606 GN=PRPF19 PE=1 SV=1	5.253	1.81108	0.856853	0.04792	0.623645	+	5	12.382	11.9494	11.3159	11.5868	11.0239
P00390	GSR	Glutathione reductase, mitochondrial OS=Homo sapiens OX=9606 GN=GSR PE=1 SV=2	56.257	1.79547	0.844365	0.04107	0.623645	+	5	13.7127	13.9563	12.6677	13.2749	13.0278
Q6UX06	OLFM4	Olfactomedin-4 OS=Homo sapiens OX=9606 GN=OLFM4 PE=1 SV=1	57.28	1.77062	0.824254	0.0362	0.623645	+	5	15.6993	15.4222	14.4266	14.9361	14.8468
P00450	CP	Ceruloplasmin OS=Homo sapiens OX=9606 GN=CP PE=1 SV=1	122.205	1.76318	0.818181	0.04779	0.623645	+	5	16.0354	16.578	15.5116	15.2753	15.6787
Q15555	MAPRE2	Microtubule-associated protein RP/EB family member 2 OS=Homo sapiens OX=9606 GN=MAPRE2 PE=1 SV=1	37.031	1.74669	0.804624	0.01278	0.623645	+	5	12.1132	11.9084	11.0568	11.1648	11.3971
O75937	DNAJC8	DnaJ homolog subfamily C member 8 OS=Homo sapiens OX=9606 GN=DNAJC8 PE=1 SV=2	29.842	1.74523	0.803416	0.02987	0.623645	+	5	13.1645	13.1598	12.5122	12.0399	12.5242
Q8NBY1	STK26	Serine/threonine-protein kinase 26 OS=Homo sapiens OX=9606 GN=STK26 PE=1 SV=1	43.868	1.73867	0.797981	0.01271	0.623645	+	5	12.4991	12.1883	11.624	11.401	11.6122
Q15208	STK38	Serine/threonine-protein kinase 38 OS=Homo sapiens OX=9606 GN=STK38 PE=1 SV=1	54.19	1.72187	0.783974	0.02622	0.623645	+	5	13.124	12.9807	12.2044	12.0605	12.5403
Q7KZF4	SND1	Staphylococcal nuclease domain-containing protein 1 OS=Homo sapiens OX=9606 GN=SND1 PE=1 SV=1	101.997	1.71468	0.777941	0.02553	0.623645	+	3	12.6193	12.5833	NA	NA	11.8234
J3KQ32	OLA1	Obg-like ATPase 1 OS=Homo sapiens OX=9606 GN=OLA1 PE=1 SV=1	46.938	1.68482	0.752596	0.02654	0.623645	+	5	10.7749	11.1842	10.0667	10.3102	10.3041
B4E0K5	MAPK14	Mitogen-activated protein kinase OS=Homo sapiens OX=9606 GN=MAPK14 PE=1 SV=1	32.357	1.67155	0.741188	0.02343	0.623645	+	5	14.4508	14.3312	13.3967	13.8249	13.7279
P07738	BPGM	Bisphosphoglycerate mutase OS=Homo sapiens OX=9606 GN=BPGM PE=1 SV=2	30.005	1.66502	0.735537	0.008417	0.623645	+	5	11.4074	11.3825	10.4783	10.7724	10.7275
P52790	HK3	Hexokinase-3 OS=Homo sapiens OX=9606 GN=HK3 PE=1 SV=2	99.025	1.58556	0.664992	0.04381	0.623645	+	5	14.0532	14.03	13.075	13.48	13.5748
B4DQI1	C2	Complement C2 OS=Homo sapiens OX=9606 GN=C2 PE=1 SV=1	56.466	1.50231	0.587185	0.04444	0.623645	+	5	11.8303	11.6636	11.2503	10.9082	11.3209
P37837	TALDO1	Transaldolase OS=Homo sapiens OX=9606 GN=TALDO1 PE=1 SV=2	37.54	1.49677	0.581852	0.02883	0.623645	+	5	17.2089	17.0682	16.4792	16.7672	16.4238
Q9ULZ3	PYCARD	Apoptosis-associated speck-like protein containing a CARD OS=Homo sapiens OX=9606 GN=PYCARD PE=1 SV=2	21.627	1.49475	0.579904	0.02612	0.623645	+	5	14.7782	14.9505	14.1725	14.4785	14.2024
P78417	GSTO1	Glutathione S-transferase omega-1 OS=Homo sapiens OX=9606 GN=GSTO1 PE=1 SV=2	27.566	1.49336	0.578565	0.04463	0.623645	+	5	15.0642	14.8628	14.3292	14.6172	14.2084
H7BZH6	TP53I3	Quinone oxidoreductase PIG3 (Fragment) OS=Homo sapiens OX=9606 GN=TP53I3 PE=1 SV=1	22.654	1.45402	0.540047	0.03319	0.623645	+	5	12.2956	12.674	11.986	11.9417	11.9065
P61081	UBE2M	NEDD8-conjugating enzyme Ubc12 OS=Homo sapiens OX=9606 GN=UBE2M PE=1 SV=1	20.9	1.44358	0.529651	0.001955	0.623645	+	3	11.4932	11.4951	NA	NA	10.9645
Q9ULV4	CORO1C	Coronin-1C OS=Homo sapiens OX=9606 GN=CORO1C PE=1 SV=1	53.249	1.4312	0.517221	0.0212	0.623645	+	5	13.9247	13.706	13.1863	13.4093	13.2987
Q86UX7	FERMT3	Fermitin family homolog 3 OS=Homo sapiens OX=9606 GN=FERMT3 PE=1 SV=1	75.953	1.41076	0.496472	0.007924	0.623645	+	5	14.4258	14.2774	13.7713	13.8809	13.9132
Q96P70	IPO9	Importin-9 OS=Homo sapiens OX=9606 GN=IPO9 PE=1 SV=3	115.963	1.40017	0.485601	0.01946	0.623645	+	3	11.8182	11.801	NA	NA	11.324
M0QXB0	LSM4	U6 snRNA-associated Sm-like protein LSm4 OS=Homo sapiens OX=9606 GN=LSM4 PE=1 SV=1	7.83	1.35063	0.433629	0.01062	0.623645	+	3	10.4386	10.4302	NA	NA	10.0008
J3KS22	DCXR	L-xylulose reductase (Fragment) OS=Homo sapiens OX=9606 GN=DCXR PE=1 SV=8	23.804	1.32637	0.407482	0.0249	0.623645	+	3	12.6705	12.6521	NA	NA	12.2538
P34059	GALNS	N-acetylgalactosamine-6-sulfatase OS=Homo sapiens OX=9606 GN=GALNS PE=1 SV=1	58.026	1.32421	0.40513	0.04599	0.623645	+	5	12.731	12.8747	12.5686	12.326	12.2985
Q9HBI0	PARVG	Gamma-parvin OS=Homo sapiens OX=9606 GN=PARVG PE=1 SV=1	37.485	1.32133	0.401994	0.04681	0.623645	+	3	11.651	11.6168	NA	NA	11.2319
E9PQD8	GATD1	Glutamine amidotransferase-like class 1 domain-containing protein 1 OS=Homo sapiens OX=9606 GN=GATD1 PE=1 SV=1	12.783	1.30782	0.387161	0.04106	0.623645	+	3	10.9556	10.9267	NA	NA	10.554
Q9UJ68	MSRA	Mitochondrial peptide methionine sulfoxide reductase OS=Homo sapiens OX=9606 GN=MSRA PE=1 SV=1	26.132	1.29286	0.370563	0.02944	0.623645	+	5	15.4044	15.3957	14.9153	15.0074	15.1656
B1AH49	MPST	3-mercaptopyruvate sulfurtransferase OS=Homo sapiens OX=9606 GN=MPST PE=1 SV=1	24.982	1.27851	0.354465	0.01779	0.623645	+	5	12.5075	12.3071	12.0516	12.0496	12.0574
I3L3G9	NDE1	Nuclear distribution protein nudE homolog 1 OS=Homo sapiens OX=9606 GN=NDE1 PE=1 SV=1	15.143	1.25498	0.327665	0.03716	0.623645	+	3	10.2394	10.2173	NA	NA	9.90072
P53004	BLVRA	Biliverdin reductase A OS=Homo sapiens OX=9606 GN=BLVRA PE=1 SV=2	33.428	1.25456	0.327178	0.02046	0.623645	+	5	14.6362	14.4637	14.172	14.2595	14.2369
Q9BV40	VAMP8	Vesicle-associated membrane protein 8 OS=Homo sapiens OX=9606 GN=VAMP8 PE=1 SV=1	11.438	1.24734	0.318856	0.03957	0.623645	+	5	12.9842	12.8516	12.4834	12.6337	12.6801
P52566	ARHGDIB	Rho GDP-dissociation inhibitor 2 OS=Homo sapiens OX=9606 GN=ARHGDIB PE=1 SV=3	22.988	1.23776	0.307728	0.03297	0.623645	+	5	16.6565	16.8247	16.4964	16.3566	16.4456
B8ZZ54	HSPE1	10 kDa heat shock protein, mitochondrial OS=Homo sapiens OX=9606 GN=HSPE1 PE=1 SV=1	5.19	0.799845	-0.322208	0.0443	0.623645	-	5	13.5218	13.5803	13.803	13.7981	14.0187
P62873	GNB1	Guanine nucleotide-binding protein G(I)/G(S)/G(T) subunit beta-1 OS=Homo sapiens OX=9606 GN=GNB1 PE=1 SV=3	37.377	0.73767	-0.438952	0.04997	0.623645	-	5	11.9915	12.0982	12.6574	12.4908	12.3033
Q9GZM7	TINAGL1	Tubulointerstitial nephritis antigen-like OS=Homo sapiens OX=9606 GN=TINAGL1 PE=1 SV=1	52.387	0.725568	-0.462818	0.03432	0.623645	-	3	8.8192	8.79036	NA	NA	9.2676
O95544	NADK	NAD kinase OS=Homo sapiens OX=9606 GN=NADK PE=1 SV=1	49.228	0.717556	-0.478837	0.02492	0.623645	-	5	11.6955	11.6089	12.1269	12.2805	11.9857
A0A0U1RQT1	ACAP2	Arf-GAP with coiled-coil, ANK repeat and PH domain-containing protein 2 (Fragment) OS=Homo sapiens OX=9606 GN=ACAP2 PE=1 SV=1	62.842	0.684955	-0.545918	0.01506	0.623645	-	3	8.2122	8.22712	NA	NA	8.76558
P25685	DNAJB1	DnaJ homolog subfamily B member 1 OS=Homo sapiens OX=9606 GN=DNAJB1 PE=1 SV=4	38.044	0.623483	-0.681578	0.0136	0.623645	-	5	12.6673	12.6721	13.2546	13.5531	13.2461
A0A0G2JNZ5	GBA	Glucosylceramidase OS=Homo sapiens OX=9606 GN=GBA PE=1 SV=1	50.263	0.61318	-0.705618	0.03564	0.623645	-	5	12.6006	12.4723	13.4608	13.2985	12.9669
Q9NZT1	CALML5	Calmodulin-like protein 5 OS=Homo sapiens OX=9606 GN=CALML5 PE=1 SV=2	15.893	0.579996	-0.785885	0.02252	0.623645	-	5	14.1776	14.0637	14.6824	15.1527	14.8844
A0A087WW92	GRIPAP1	GRIP1-associated protein 1 (Fragment) OS=Homo sapiens OX=9606 GN=GRIPAP1 PE=1 SV=6	7.604	0.559199	-0.838565	0.03889	0.623645	-	3	9.97831	10.0375	NA	NA	10.8465
P12830	CDH1	Cadherin-1 OS=Homo sapiens OX=9606 GN=CDH1 PE=1 SV=3	97.456	0.557371	-0.843291	0.0166	0.623645	-	5	12.8593	12.4008	13.4336	13.5128	13.4737
P48723	HSPA13	Heat shock 70 kDa protein 13 OS=Homo sapiens OX=9606 GN=HSPA13 PE=1 SV=1	51.927	0.533003	-0.907784	0.002656	0.623645	-	5	11.9206	11.885	12.9479	12.6891	12.7948
Q5TAE8	ERO1B	ERO1-like protein beta (Fragment) OS=Homo sapiens OX=9606 GN=ERO1B PE=1 SV=1	19.966	0.501883	-0.994576	0.01174	0.623645	-	5	9.09473	9.29092	10.2579	10.3647	9.9396
Q16222	UAP1	UDP-N-acetylhexosamine pyrophosphorylase OS=Homo sapiens OX=9606 GN=UAP1 PE=1 SV=3	58.769	0.49427	-1.01663	0.003788	0.623645	-	5	10.0771	10.3264	11.1572	11.1526	11.3453
Q8WXI7	MUC16	Mucin-16 OS=Homo sapiens OX=9606 GN=MUC16 PE=1 SV=3	1519.17	0.461177	-1.11661	0.03828	0.623645	-	5	12.3919	12.3812	13.5461	13.0605	13.9028
Q99538	LGMN	Legumain OS=Homo sapiens OX=9606 GN=LGMN PE=1 SV=1	49.411	0.455195	-1.13544	0.0157	0.623645	-	5	12.2513	11.9681	13.4978	13.2806	12.9569
Q6RW13	AGTRAP	Type-1 angiotensin II receptor-associated protein OS=Homo sapiens OX=9606 GN=AGTRAP PE=1 SV=1	17.419	0.454483	-1.1377	0.04647	0.623645	-	5	9.23004	9.43839	10.1805	10.9947	10.2405
O75976	CPD	Carboxypeptidase D OS=Homo sapiens OX=9606 GN=CPD PE=1 SV=2	152.931	0.449344	-1.15411	0.04275	0.623645	-	5	13.3328	14.1166	15.0367	14.6095	14.9903
A6ZIE4	MUC1	MUC1 isoform M10 OS=Homo sapiens OX=9606 GN=MUC1 PE=1 SV=1	20.037	0.448659	-1.15631	0.01092	0.623645	-	5	10.3101	10.8123	11.591	11.7893	11.7722
A0A0C4DG85	ADH7	All-trans-retinol dehydrogenase [NAD(+)] ADH7 OS=Homo sapiens OX=9606 GN=ADH7 PE=1 SV=1	40.006	0.426958	-1.22783	0.0423	0.623645	-	5	13.312	13.7018	14.2319	15.0664	14.9058
Q9UBX1	CTSF	Cathepsin F OS=Homo sapiens OX=9606 GN=CTSF PE=1 SV=1	53.366	0.419194	-1.25431	0.02744	0.623645	-	5	12.423	12.4726	13.9019	13.9813	13.2232
O60218	AKR1B10	Aldo-keto reductase family 1 member B10 OS=Homo sapiens OX=9606 GN=AKR1B10 PE=1 SV=2	36.02	0.405475	-1.30231	0.007128	0.623645	-	5	13.9474	13.8383	15.0188	15.4934	15.0734
Q9UBG3	CRNN	Cornulin OS=Homo sapiens OX=9606 GN=CRNN PE=1 SV=1	53.533	0.393433	-1.34581	0.002717	0.623645	-	5	13.4792	13.1973	14.5431	14.8158	14.6934
P48594	SERPINB4	Serpin B4 OS=Homo sapiens OX=9606 GN=SERPINB4 PE=1 SV=2	44.854	0.374642	-1.41642	0.04118	0.623645	-	5	13.412	14.2147	14.9832	15.6664	15.0397
P16870	CPE	Carboxypeptidase E OS=Homo sapiens OX=9606 GN=CPE PE=1 SV=1	53.151	0.352227	-1.50542	0.01206	0.623645	-	5	13.9329	14.5863	15.7902	15.9242	15.5807
P12110	COL6A2	Collagen alpha-2(VI) chain OS=Homo sapiens OX=9606 GN=COL6A2 PE=1 SV=4	108.579	0.329849	-1.60012	0.001542	0.623645	-	5	12.37	12.5067	14.2378	13.8886	13.9889
A0A0A0MRJ7	F5	Coagulation factor V OS=Homo sapiens OX=9606 GN=F5 PE=1 SV=1	252.236	0.322188	-1.63403	0.00506	0.623645	-	5	12.2612	12.5222	14.2485	14.0959	13.7327
P26572	MGAT1	Alpha-1,3-mannosyl-glycoprotein 2-beta-N-acetylglucosaminyltransferase OS=Homo sapiens OX=9606 GN=MGAT1 PE=1 SV=2	50.878	0.292415	-1.77391	0.0009254	0.623645	-	5	11.5175	11.8038	13.559	13.3644	13.3803
Q13217	DNAJC3	DnaJ homolog subfamily C member 3 OS=Homo sapiens OX=9606 GN=DNAJC3 PE=1 SV=1	57.58	0.259713	-1.94501	0.04094	0.623645	-	5	10.6423	11.7734	13.6483	13.1665	12.6438
P15328	FOLR1	Folate receptor alpha OS=Homo sapiens OX=9606 GN=FOLR1 PE=1 SV=3	29.819	0.258317	-1.95279	0.02024	0.623645	-	3	12.7485	12.6768	NA	NA	14.6654
P55064	AQP5	Aquaporin-5 OS=Homo sapiens OX=9606 GN=AQP5 PE=1 SV=1	28.292	0.209717	-2.25348	0.03284	0.623645	-	5	9.71239	9.97422	13.0118	11.6103	11.6683
P31944	CASP14	Caspase-14 OS=Homo sapiens OX=9606 GN=CASP14 PE=1 SV=2	27.68	0.194803	-2.35992	0.04036	0.623645	-	5	12.9381	12.4476	16.0408	14.3577	14.7597
P81605	DCD	Dermcidin OS=Homo sapiens OX=9606 GN=DCD PE=1 SV=2	11.284	0.189176	-2.4022	0.01198	0.623645	-	5	11.8707	12.3386	15.0922	14.0274	14.4008
Q5JR08	RHOC	Rho-related GTP-binding protein RhoC (Fragment) OS=Homo sapiens OX=9606 GN=RHOC PE=1 SV=8	21.523	0.145743	-2.77851	0.006216	0.623645	-	5	10.5562	10.3893	13.3911	13.7006	12.6622
F5H4Q7	GRIP1	Glutamate receptor-interacting protein 1 (Fragment) OS=Homo sapiens OX=9606 GN=GRIP1 PE=1 SV=1	84.155	0.0197211	-5.66411	0.03803	0.623645	-	5	10.6717	8.10824	16.8155	13.3943	14.9524
