# Supplementary material for: Proteomic characteristics of saliva in patients with different subgroups of IgG4-RD
Source: Front Immunol. 2022 Nov 22;13:1026921. doi: 10.3389/fimmu.2022.1026921 (PMC9723444; doi:10.3389/fimmu.2022.1026921)
Supplement: Supplementary Table 3 — DEPs identified in the comparisons between IgG4-RD with four subgroups and HC. [file Table_3.xlsx]

## Sheet: A_HC
Accession	Gene	Description	Mw(kDa)	Corrected A/H	log2 A/H	P-value	P.adjust	Diff Sig	Count	10	2	3	H-10	H-11	H-16	H-7	H-9
P03973	SLPI	Antileukoproteinase OS=Homo sapiens OX=9606 GN=SLPI PE=1 SV=2	14.326	3.91705	1.96977	0.02757	0.9992	+	8	13.5721	12.7899	11.8455	10.2373	11.2008	12.2585	9.91711	10.2165
P01877	IGHA2	Immunoglobulin heavy constant alpha 2 OS=Homo sapiens OX=9606 GN=IGHA2 PE=1 SV=4	36.591	3.85471	1.94662	0.04316	0.9992	+	8	16.5857	13.9446	13.4045	13.0183	12.5312	13.1481	12.0678	12.7262
P01706	IGLV2-11	Immunoglobulin lambda variable 2-11 OS=Homo sapiens OX=9606 GN=IGLV2-11 PE=1 SV=2	12.644	2.68522	1.42504	0.03372	0.9992	+	8	15.2311	15.2361	14.8649	12.3787	13.7307	13.7254	13.8004	14.7931
A0A590UJZ9	DMBT1	Deleted in malignant brain tumors 1 protein OS=Homo sapiens OX=9606 GN=DMBT1 PE=1 SV=1	166.577	2.68276	1.42372	0.0403	0.9992	+	8	18.5518	17.7206	17.3196	17.0011	17.0765	16.0201	15.2247	16.879
P80511	S100A12	Protein S100-A12 OS=Homo sapiens OX=9606 GN=S100A12 PE=1 SV=2	10.575	2.66632	1.41485	0.04445	0.9992	+	8	15.0323	15.4649	13.848	12.5791	12.999	13.932	14.3167	13.0077
P04211	IGLV7-43	Immunoglobulin lambda variable 7-43 OS=Homo sapiens OX=9606 GN=IGLV7-43 PE=3 SV=2	12.451	2.6559	1.4092	0.01341	0.9992	+	8	16.4268	15.1267	16.0259	14.8317	15.0716	13.94	14.0268	14.3829
P0DP03	IGHV3-30-5	Immunoglobulin heavy variable 3-30-5 OS=Homo sapiens OX=9606 GN=IGHV3-30-5 PE=3 SV=1	12.947	2.55763	1.35481	0.01715	0.9992	+	8	16.3947	15.0748	16.1402	14.9547	14.9578	13.8245	14.2289	14.6096
Q7Z5R6	APBB1IP	Amyloid beta A4 precursor protein-binding family B member 1-interacting protein OS=Homo sapiens OX=9606 GN=APBB1IP PE=1 SV=1	73.183	2.5417	1.34579	0.04996	0.9992	+	6	NA	13.5499	12.5737	12.035	11.0068	NA	11.6932	12.129
P01591	JCHAIN	Immunoglobulin J chain OS=Homo sapiens OX=9606 GN=JCHAIN PE=1 SV=4	18.099	2.51066	1.32807	0.01699	0.9992	+	8	16.9606	16.1031	15.3317	14.7458	15.3537	14.4864	14.4886	14.9441
P01833	PIGR	Polymeric immunoglobulin receptor OS=Homo sapiens OX=9606 GN=PIGR PE=1 SV=4	83.284	2.50083	1.32241	0.03113	0.9992	+	8	19.7467	18.0875	19.2105	17.6647	18.4032	17.6822	16.9428	17.7697
E9PM31	CD81	CD81 antigen (Fragment) OS=Homo sapiens OX=9606 GN=CD81 PE=1 SV=8	10.028	2.46239	1.30006	0.009206	0.9992	+	8	11.9662	10.8911	12.3609	10.2986	10.2042	10.7503	10.4964	10.4471
A0A0C4DH68	IGKV2-24	Immunoglobulin kappa variable 2-24 OS=Homo sapiens OX=9606 GN=IGKV2-24 PE=3 SV=1	13.079	2.42034	1.27521	0.04312	0.9992	+	8	15.5234	13.939	14.9459	12.9857	14.3417	13.2533	13.0376	14.0194
A0A075B6I9	IGLV7-46	Immunoglobulin lambda variable 7-46 OS=Homo sapiens OX=9606 GN=IGLV7-46 PE=3 SV=4	12.468	2.39473	1.25986	0.02637	0.9992	+	8	15.1926	13.8082	14.6278	13.508	13.9235	13.0348	12.5263	13.4224
E9PJC7	CD82	Tetraspanin (Fragment) OS=Homo sapiens OX=9606 GN=CD82 PE=1 SV=1	17.332	2.38802	1.25581	0.04036	0.9992	+	8	11.3959	11.1716	12.762	10.0528	10.827	10.9399	10.944	9.83968
P01876	IGHA1	Immunoglobulin heavy constant alpha 1 OS=Homo sapiens OX=9606 GN=IGHA1 PE=1 SV=2	37.655	2.24137	1.16438	0.02836	0.9992	+	8	19.4472	17.9729	18.6332	17.4873	18.1158	17.1366	17.084	17.7764
P01743	IGHV1-46	Immunoglobulin heavy variable 1-46 OS=Homo sapiens OX=9606 GN=IGHV1-46 PE=1 SV=2	12.933	2.20647	1.14174	0.02058	0.9992	+	8	14.6063	12.9197	13.8911	12.696	12.6579	12.6776	12.4554	12.8329
A0A2R8YDY3	CD55	Complement decay-accelerating factor (Fragment) OS=Homo sapiens OX=9606 GN=CD55 PE=1 SV=1	21.495	2.1333	1.09309	0.03062	0.9992	+	6	NA	11.1241	10.7298	10.0996	9.93192	NA	10.082	9.22208
A0A087WZR4	FCGR3B	Low affinity immunoglobulin gamma Fc region receptor III-B OS=Homo sapiens OX=9606 GN=FCGR3B PE=1 SV=1	24.422	2.03899	1.02785	0.01354	0.9992	+	8	12.7057	12.9738	13.2954	11.401	11.6579	12.0539	12.5762	12.13
Q96RF0	SNX18	Sorting nexin-18 OS=Homo sapiens OX=9606 GN=SNX18 PE=1 SV=2	68.894	1.9997	0.999787	0.01816	0.9992	+	6	NA	10.0173	10.7741	9.29969	9.38809	NA	9.27952	9.61636
P80188	LCN2	Neutrophil gelatinase-associated lipocalin OS=Homo sapiens OX=9606 GN=LCN2 PE=1 SV=2	22.588	1.91939	0.940645	0.01804	0.9992	+	8	16.7321	16.2012	17.2506	15.495	15.3884	15.9853	16.0065	16.0614
P10909	CLU	Clusterin OS=Homo sapiens OX=9606 GN=CLU PE=1 SV=1	52.495	1.91395	0.936555	0.03636	0.9992	+	8	17.2843	17.4023	17.4048	16.7509	16.8536	15.8856	15.707	16.939
O95274	LYPD3	Ly6/PLAUR domain-containing protein 3 OS=Homo sapiens OX=9606 GN=LYPD3 PE=1 SV=2	35.971	1.80647	0.853177	0.04343	0.9992	+	8	14.5042	13.7536	13.0952	13.0557	13.3045	12.6375	12.7958	12.8622
O00391	QSOX1	Sulfhydryl oxidase 1 OS=Homo sapiens OX=9606 GN=QSOX1 PE=1 SV=3	82.578	1.73435	0.794398	0.02346	0.9992	+	8	14.7507	14.1298	14.1301	13.3814	13.7724	13.8939	12.9917	13.6728
Q13332	PTPRS	Receptor-type tyrosine-protein phosphatase S OS=Homo sapiens OX=9606 GN=PTPRS PE=1 SV=3	217.041	1.65876	0.730101	0.04777	0.9992	+	8	13.8674	13.1409	13.1976	12.3938	13.0891	13.011	12.1436	12.7217
H3BQF7	IST1	IST1 homolog (Fragment) OS=Homo sapiens OX=9606 GN=IST1 PE=1 SV=1	19.013	1.57022	0.65097	0.04159	0.9992	+	8	13.3212	13.9605	14.2541	13.1148	12.8455	13.4885	13.3954	13.1274
Q7Z6P3	RAB44	Ras-related protein Rab-44 OS=Homo sapiens OX=9606 GN=RAB44 PE=1 SV=4	110.85	1.4962	0.581302	0.01371	0.9992	+	8	11.4361	11.7782	11.8961	11.108	10.8002	11.209	11.425	11.0686
Q8NFZ8	CADM4	Cell adhesion molecule 4 OS=Homo sapiens OX=9606 GN=CADM4 PE=1 SV=1	42.785	1.47954	0.565144	0.001941	0.9992	+	8	12.1776	12.1118	12.2685	11.6907	11.7866	11.3669	11.7337	11.5263
H7BZH6	TP53I3	Quinone oxidoreductase PIG3 (Fragment) OS=Homo sapiens OX=9606 GN=TP53I3 PE=1 SV=1	22.654	1.46372	0.54964	0.04245	0.9992	+	8	12.4876	12.0782	12.1072	11.8259	11.8703	12.0099	11.3839	11.2836
X5D2R7	PSMB8	Proteasome subunit beta OS=Homo sapiens OX=9606 GN=PSMB8 PE=1 SV=1	30.354	0.708202	-0.497768	0.04076	0.9992	-	8	12.7607	13.0515	13.4418	13.4632	13.5833	13.3502	13.9154	13.6002
P62258	YWHAE	14-3-3 protein epsilon OS=Homo sapiens OX=9606 GN=YWHAE PE=1 SV=1	29.174	0.668751	-0.580459	0.003017	0.9992	-	8	14.1656	14.1148	14.4767	14.8648	14.869	14.9682	14.5782	14.884
P61981	YWHAG	14-3-3 protein gamma OS=Homo sapiens OX=9606 GN=YWHAG PE=1 SV=2	28.303	0.623723	-0.681022	0.009132	0.9992	-	8	13.5728	14.2116	14.2429	14.8259	14.5226	14.8412	14.6001	14.6608
P38117	ETFB	Electron transfer flavoprotein subunit beta OS=Homo sapiens OX=9606 GN=ETFB PE=1 SV=3	27.844	0.617944	-0.694453	0.04637	0.9992	-	6	NA	11.3844	11.6717	12.194	12.3851	NA	11.8098	12.5012
E9PEX6	DLD	Dihydrolipoyl dehydrogenase OS=Homo sapiens OX=9606 GN=DLD PE=1 SV=1	51.815	0.552485	-0.855992	0.01784	0.9992	-	8	12.6917	12.8401	13.5212	14.0292	13.9376	13.6062	13.5128	14.2825
F2Z3K5	RPN2	Dolichyl-diphosphooligosaccharide--protein glycosyltransferase subunit 2 (Fragment) OS=Homo sapiens OX=9606 GN=RPN2 PE=1 SV=1	17.808	0.546167	-0.872585	0.03436	0.9992	-	6	NA	9.99553	10.1504	10.5071	10.9751	NA	10.9059	11.3943
P13804	ETFA	Electron transfer flavoprotein subunit alpha, mitochondrial OS=Homo sapiens OX=9606 GN=ETFA PE=1 SV=1	35.08	0.530529	-0.914497	0.03728	0.9992	-	8	11.6108	11.7575	12.0501	12.9296	13.2048	12.235	12.0298	13.204
P32119	PRDX2	Peroxiredoxin-2 OS=Homo sapiens OX=9606 GN=PRDX2 PE=1 SV=5	21.892	0.50899	-0.974291	0.02223	0.9992	-	8	14.5612	14.2321	14.9387	15.2859	15.1665	15.1893	15.942	16.1744
P30048	PRDX3	Thioredoxin-dependent peroxide reductase, mitochondrial OS=Homo sapiens OX=9606 GN=PRDX3 PE=1 SV=3	27.693	0.484082	-1.04668	0.0156	0.9992	-	8	12.6119	13.3036	13.1184	13.3668	13.9289	14.357	14.572	14.0652
P40926	MDH2	Malate dehydrogenase, mitochondrial OS=Homo sapiens OX=9606 GN=MDH2 PE=1 SV=3	35.503	0.480231	-1.0582	0.02366	0.9992	-	8	15.3441	14.8934	15.0482	16.8543	16.4915	15.617	15.5384	16.266
P28074	PSMB5	Proteasome subunit beta type-5 OS=Homo sapiens OX=9606 GN=PSMB5 PE=1 SV=3	28.48	0.412022	-1.27921	0.04009	0.9992	-	8	10.6708	9.58918	8.99174	11.1115	10.2796	11.8084	11.1626	10.7869
P00915	CA1	Carbonic anhydrase 1 OS=Homo sapiens OX=9606 GN=CA1 PE=1 SV=2	28.87	0.291906	-1.77642	0.01901	0.9992	-	8	13.8605	13.2106	13.814	15.0494	14.5415	14.7127	16.1783	16.5419

## Sheet: B_HC
Accession	Gene	Description	Mw(kDa)	Corrected B/H	log2 B/H	P-value	P.adjust	Diff Sig	Count	5	7	H-10	H-11	H-16	H-7	H-9
A0A2R8YDY3	CD55	Complement decay-accelerating factor (Fragment) OS=Homo sapiens OX=9606 GN=CD55 PE=1 SV=1	21.495	8.78883	3.13567	0.006607	0.774821	+	5	12.9696	NA	10.0996	9.93192	NA	10.082	9.22208
A0A2R8Y5P9	SHROOM3	Protein Shroom3 OS=Homo sapiens OX=9606 GN=SHROOM3 PE=1 SV=1	208.05	5.6912	2.50873	0.002155	0.459424	+	5	14.7229	NA	11.9982	12.5297	NA	12.1884	12.1403
H0Y5I3	SLC44A4	Choline transporter-like protein 4 (Fragment) OS=Homo sapiens OX=9606 GN=SLC44A4 PE=1 SV=1	45.737	5.50536	2.46084	0.01402	0.966821	+	5	11.9267	NA	8.94247	9.9374	NA	9.64281	9.34083
P04114	APOB	Apolipoprotein B-100 OS=Homo sapiens OX=9606 GN=APOB PE=1 SV=2	515.605	3.95094	1.9822	0.002354	0.459424	+	7	18.4079	17.6746	15.8428	15.6564	16.5033	16.4457	15.847
P33151	CDH5	Cadherin-5 OS=Homo sapiens OX=9606 GN=CDH5 PE=1 SV=5	87.528	3.94636	1.98052	0.03222	0.990614	+	5	13.0808	NA	10.5375	11.247	NA	10.9688	11.6478
P06702	S100A9	Protein S100-A9 OS=Homo sapiens OX=9606 GN=S100A9 PE=1 SV=1	13.242	3.87244	1.95324	0.01713	0.990614	+	7	15.7024	17.3518	14.1703	14.4271	15.3585	14.342	14.5711
P43652	AFM	Afamin OS=Homo sapiens OX=9606 GN=AFM PE=1 SV=1	69.069	3.78176	1.91906	0.01516	0.97782	+	7	13.9775	12.6314	11.506	10.9173	12.1436	10.8604	11.4995
P01861	IGHG4	Immunoglobulin heavy constant gamma 4 OS=Homo sapiens OX=9606 GN=IGHG4 PE=1 SV=1	35.941	3.66657	1.87443	0.02558	0.990614	+	7	17.4509	15.4804	14.9751	14.5824	13.9546	14.6427	14.8012
E7EX40	RAB11FIP1	Rab11 family-interacting protein 1 OS=Homo sapiens OX=9606 GN=RAB11FIP1 PE=1 SV=1	54.833	3.48448	1.80094	0.01053	0.799041	+	7	12.4426	13.1924	10.4519	10.7934	11.8457	11.2453	10.7467
A0A087WYV6	TSPAN6	Tetraspanin-6 OS=Homo sapiens OX=9606 GN=TSPAN6 PE=1 SV=1	14.958	3.47377	1.7965	0.002407	0.459424	+	5	12.4353	NA	10.5482	10.7139	NA	10.834	10.459
P23083	IGHV1-2	Immunoglobulin heavy variable 1-2 OS=Homo sapiens OX=9606 GN=IGHV1-2 PE=1 SV=2	13.085	3.33235	1.73654	0.02248	0.990614	+	7	14.4395	13.4844	11.9966	12.1789	13.3148	11.8216	11.8153
E9PHT9	ANXA5	Annexin OS=Homo sapiens OX=9606 GN=ANXA5 PE=1 SV=1	18.224	3.10048	1.63249	0.01626	0.990614	+	7	12.9274	12.595	10.9332	10.3894	11.0523	12.0509	11.2176
M0R231	KLK8	Kallikrein-8 (Fragment) OS=Homo sapiens OX=9606 GN=KLK8 PE=4 SV=1	10.653	3.06693	1.6168	0.001192	0.459424	+	5	12.5186	NA	11.0436	10.9218	NA	10.8871	10.7549
P01714	IGLV3-19	Immunoglobulin lambda variable 3-19 OS=Homo sapiens OX=9606 GN=IGLV3-19 PE=1 SV=2	12.042	2.72993	1.44887	0.03508	0.990614	+	7	14.8178	13.1947	12.4902	12.2667	13.0691	12.2129	12.7479
P02452	COL1A1	Collagen alpha-1(I) chain OS=Homo sapiens OX=9606 GN=COL1A1 PE=1 SV=5	138.942	2.71892	1.44303	0.002493	0.459424	+	5	14.3861	NA	12.8034	13.1303	NA	12.9212	12.9172
F5H6E2	MYO1C	Unconventional myosin-Ic OS=Homo sapiens OX=9606 GN=MYO1C PE=1 SV=1	118.994	2.60079	1.37895	0.04741	0.990614	+	5	9.60469	NA	7.89361	8.43593	NA	8.6538	7.91961
B4DYP1	DDAH1	Dimethylargininase OS=Homo sapiens OX=9606 GN=DDAH1 PE=1 SV=1	20.535	2.56344	1.35808	0.03531	0.990614	+	5	10.9763	NA	9.61257	9.92241	NA	9.78033	9.15767
Q5EG05	CARD16	Caspase recruitment domain-containing protein 16 OS=Homo sapiens OX=9606 GN=CARD16 PE=1 SV=1	22.625	2.43963	1.28666	0.02318	0.990614	+	7	13.1759	14.0356	12.5707	12.1058	11.9043	12.9609	12.0536
B5MCX3	SEPTIN2	Septin-2 OS=Homo sapiens OX=9606 GN=SEPTIN2 PE=1 SV=1	36.94	2.40219	1.26435	0.04127	0.990614	+	7	14.2907	13.9854	12.6477	12.447	13.7828	13.1887	12.3023
Q96RF0	SNX18	Sorting nexin-18 OS=Homo sapiens OX=9606 GN=SNX18 PE=1 SV=2	68.894	2.38784	1.25571	0.005356	0.717627	+	5	10.6516	NA	9.29969	9.38809	NA	9.27952	9.61636
A0A087X1J7	GPX3	Glutathione peroxidase OS=Homo sapiens OX=9606 GN=GPX3 PE=1 SV=1	25.402	2.36099	1.23939	0.02056	0.990614	+	7	14.3163	13.2542	12.6667	12.3443	12.3912	12.2681	13.0591
M0QXF7	MYDGF	Myeloid-derived growth factor (Fragment) OS=Homo sapiens OX=9606 GN=MYDGF PE=1 SV=1	9.671	2.31115	1.20861	0.02476	0.990614	+	7	14.8265	15.1399	13.6077	13.5477	14.6475	13.6613	13.4088
P31949	S100A11	Protein S100-A11 OS=Homo sapiens OX=9606 GN=S100A11 PE=1 SV=2	11.74	2.19667	1.13532	0.03785	0.990614	+	7	15.0056	14.7434	13.5858	13.442	13.3841	14.6781	13.6058
H7BZH6	TP53I3	Quinone oxidoreductase PIG3 (Fragment) OS=Homo sapiens OX=9606 GN=TP53I3 PE=1 SV=1	22.654	1.99443	0.995976	0.009518	0.799041	+	7	12.7547	12.5867	11.8259	11.8703	12.0099	11.3839	11.2836
A0AVT1	UBA6	Ubiquitin-like modifier-activating enzyme 6 OS=Homo sapiens OX=9606 GN=UBA6 PE=1 SV=1	117.97	1.93569	0.95285	0.003517	0.567116	+	6	10.4018	10.14	9.22973	NA	9.2801	9.18627	9.57608
Q99497	PARK7	Parkinson disease protein 7 OS=Homo sapiens OX=9606 GN=PARK7 PE=1 SV=2	19.891	1.92562	0.945325	0.002185	0.459424	+	7	14.1923	14.0635	13.0834	13.0556	13.4643	13.3497	12.9597
F6TLX2	GLOD4	Glyoxalase domain-containing protein 4 OS=Homo sapiens OX=9606 GN=GLOD4 PE=1 SV=1	54.72	1.84152	0.880895	0.005563	0.717627	+	7	16.7827	16.1701	15.7108	15.4628	15.7087	15.6476	15.4476
P07355	ANXA2	Annexin A2 OS=Homo sapiens OX=9606 GN=ANXA2 PE=1 SV=2	38.604	1.80384	0.851068	0.02432	0.990614	+	7	14.1048	13.3868	12.5646	12.8352	13.2619	12.9491	12.8627
P14317	HCLS1	Hematopoietic lineage cell-specific protein OS=Homo sapiens OX=9606 GN=HCLS1 PE=1 SV=3	54.014	1.68778	0.755131	0.04611	0.990614	+	7	13.9831	14.3812	13.5658	13.3183	13.1012	13.1717	13.9782
A0A494C0G1	PGM3	Phosphoacetylglucosamine mutase OS=Homo sapiens OX=9606 GN=PGM3 PE=1 SV=1	55.387	1.66866	0.73869	0.04878	0.990614	+	7	12.6659	12.9933	12.5199	11.8752	12.4479	11.7488	11.8629
Q9H4G4	GLIPR2	Golgi-associated plant pathogenesis-related protein 1 OS=Homo sapiens OX=9606 GN=GLIPR2 PE=1 SV=3	17.218	1.66665	0.73695	0.03435	0.990614	+	5	11.5719	NA	10.7766	10.7617	NA	11.0981	10.7033
P16930	FAH	Fumarylacetoacetase OS=Homo sapiens OX=9606 GN=FAH PE=1 SV=2	46.374	1.58428	0.663827	0.008949	0.799041	+	7	14.4598	14.1735	13.3443	13.6855	13.7022	13.8605	13.6715
E9PGB1	CTBP1	C-terminal-binding protein 1 (Fragment) OS=Homo sapiens OX=9606 GN=CTBP1 PE=1 SV=1	15.917	1.56722	0.64821	0.008066	0.799041	+	7	12.5227	12.4192	11.8851	11.5282	12.0862	11.8045	11.81
P31150	GDI1	Rab GDP dissociation inhibitor alpha OS=Homo sapiens OX=9606 GN=GDI1 PE=1 SV=2	50.583	1.54914	0.63147	0.01999	0.990614	+	7	14.9678	14.7249	14.2681	13.9005	14.2992	14.524	14.0823
O60235	TMPRSS11D	Transmembrane protease serine 11D OS=Homo sapiens OX=9606 GN=TMPRSS11D PE=1 SV=1	46.263	1.4976	0.582653	0.03114	0.990614	+	7	13.9711	13.6417	12.9512	13.1088	13.5541	13.3579	13.1469
P30086	PEBP1	Phosphatidylethanolamine-binding protein 1 OS=Homo sapiens OX=9606 GN=PEBP1 PE=1 SV=3	21.057	1.4879	0.573282	0.01424	0.966821	+	7	15.1475	14.9676	14.6484	14.7008	14.492	14.3517	14.2286
P48637	GSS	Glutathione synthetase OS=Homo sapiens OX=9606 GN=GSS PE=1 SV=1	52.385	1.46208	0.548026	0.04506	0.990614	+	7	15.7462	15.2748	15.0252	14.7209	15.0905	15.2255	14.7504
P42785	PRCP	Lysosomal Pro-X carboxypeptidase OS=Homo sapiens OX=9606 GN=PRCP PE=1 SV=1	55.8	0.712936	-0.488156	0.04518	0.990614	-	7	11.9106	11.9839	12.2735	12.7553	12.3341	12.1851	12.6288
P55072	VCP	Transitional endoplasmic reticulum ATPase OS=Homo sapiens OX=9606 GN=VCP PE=1 SV=4	89.322	0.621978	-0.685064	0.04171	0.990614	-	7	13.9155	14.3183	14.621	14.6124	14.5192	15.1975	15.0596
Q99536	VAT1	Synaptic vesicle membrane protein VAT-1 homolog OS=Homo sapiens OX=9606 GN=VAT1 PE=1 SV=2	41.92	0.598439	-0.740723	0.03067	0.990614	-	7	13.669	14.2633	14.5068	14.476	14.6234	15.0886	14.8395
A0A669KAW1	FUT8	Alpha-(1,6)-fucosyltransferase OS=Homo sapiens OX=9606 GN=FUT8 PE=1 SV=1	53.418	0.509026	-0.974188	0.001724	0.459424	-	7	10.7938	10.617	11.6256	12.0332	11.6033	11.6326	11.5034
P22079	LPO	Lactoperoxidase OS=Homo sapiens OX=9606 GN=LPO PE=1 SV=2	80.288	0.494564	-1.01577	0.0407	0.990614	-	7	15.8653	16.631	17.707	17.6719	17.1552	16.7567	17.0286
G3V213	AK2	Nucleoside-diphosphate kinase OS=Homo sapiens OX=9606 GN=AK2 PE=1 SV=1	14.325	0.452246	-1.14482	0.01004	0.799041	-	5	11.428	NA	12.7116	12.5667	NA	12.6857	12.3271
P13671	C6	Complement component C6 OS=Homo sapiens OX=9606 GN=C6 PE=1 SV=3	104.786	0.441492	-1.17954	0.03116	0.990614	-	5	9.66196	NA	10.982	10.4427	NA	10.8859	11.0555
A0A087X0X3	HNRNPM	Heterogeneous nuclear ribonucleoprotein M OS=Homo sapiens OX=9606 GN=HNRNPM PE=1 SV=1	77.57	0.432734	-1.20845	0.04817	0.990614	-	7	7.97798	8.90701	9.08727	9.94582	9.11899	10.2767	9.82591
Q86VR7	VSIG10L	V-set and immunoglobulin domain-containing protein 10-like OS=Homo sapiens OX=9606 GN=VSIG10L PE=2 SV=2	91.625	0.416214	-1.2646	0.04499	0.990614	-	7	11.9705	12.5877	14.0325	14.1825	12.8882	12.9625	13.653
P04745	AMY1A	Alpha-amylase 1 OS=Homo sapiens OX=9606 GN=AMY1A PE=1 SV=2	57.768	0.390685	-1.35592	0.008108	0.799041	-	7	18.5455	19.1005	20.384	20.6757	20.0982	19.6616	20.075
A0A5F9ZHD4	ACAT1	Acetyl-CoA acetyltransferase, mitochondrial OS=Homo sapiens OX=9606 GN=ACAT1 PE=1 SV=1	32.584	0.27351	-1.87033	0.02401	0.990614	-	5	9.61739	NA	12.0757	11.3116	NA	11.3338	11.2299

## Sheet: C_HC
Accession	Gene	Description	Mw(kDa)	Corrected C/H	log2 C/H	P-value	P.adjust	Diff Sig	Count	6	8	H-10	H-11	H-16	H-7	H-9
A0A075B6R2	IGHV4-4	Immunoglobulin heavy variable 4-4 OS=Homo sapiens OX=9606 GN=IGHV4-4 PE=3 SV=2	12.848	4.77862	2.25659	0.02354	0.434527	+	7	12.9705	13.3913	10.6286	10.8152	12.1618	9.65699	11.359
A0A087WYQ3	CPNE3	Copine-3 (Fragment) OS=Homo sapiens OX=9606 GN=CPNE3 PE=1 SV=1	26.686	3.45899	1.79035	0.03234	0.434527	+	7	13.3974	12.6748	10.6184	10.6565	11.448	12.4931	11.0128
A0A087WZR4	FCGR3B	Low affinity immunoglobulin gamma Fc region receptor III-B OS=Homo sapiens OX=9606 GN=FCGR3B PE=1 SV=1	24.422	2.51461	1.33034	0.01845	0.434527	+	7	12.9422	13.6461	11.401	11.6579	12.0539	12.5762	12.13
A0A087X1J7	GPX3	Glutathione peroxidase OS=Homo sapiens OX=9606 GN=GPX3 PE=1 SV=1	25.402	2.40241	1.26448	0.003719	0.434527	+	7	13.9015	13.7192	12.6667	12.3443	12.3912	12.2681	13.0591
A0A0C4DFV9	SET	Protein SET OS=Homo sapiens OX=9606 GN=SET PE=1 SV=1	31.124	2.78751	1.47897	0.04284	0.434527	+	7	14.9352	14.8224	12.9657	12.8624	14.6345	13.4944	13.0423
A0A2R8YDF1	BPI	Bactericidal permeability-increasing protein OS=Homo sapiens OX=9606 GN=BPI PE=1 SV=2	53.369	1.65504	0.726865	0.01377	0.434527	+	7	14.6532	14.7253	13.9611	13.9485	13.6904	14.3847	13.8273
A0A494C0G1	PGM3	Phosphoacetylglucosamine mutase OS=Homo sapiens OX=9606 GN=PGM3 PE=1 SV=1	55.387	1.79427	0.843397	0.04983	0.434527	+	7	13.2809	12.5878	12.5199	11.8752	12.4479	11.7488	11.8629
A0A5F9ZHM8	ASL	Argininosuccinate lyase (Fragment) OS=Homo sapiens OX=9606 GN=ASL PE=1 SV=1	38.707	2.8917	1.53192	0.02212	0.434527	+	7	13.178	13.1936	11.3361	11.3865	12.6478	11.85	11.0491
A2ACR1	PSMB9	Proteasome subunit beta OS=Homo sapiens OX=9606 GN=PSMB9 PE=1 SV=1	20.961	1.62394	0.699499	0.04962	0.434527	+	7	14.5799	14.3477	13.3503	13.5508	14.2488	13.9725	13.6989
B1AK87	CAPZB	F-actin-capping protein subunit beta OS=Homo sapiens OX=9606 GN=CAPZB PE=1 SV=1	29.295	2.73579	1.45196	0.03451	0.434527	+	7	16.0282	16.2864	14.294	14.4251	15.8903	14.5145	14.4028
B4DFW2	TIMP2	Metalloproteinase inhibitor 2 OS=Homo sapiens OX=9606 GN=TIMP2 PE=1 SV=1	16.082	2.4269	1.27911	0.01498	0.434527	+	7	12.3601	12.3794	11.1649	11.8049	11.1334	10.5721	10.7779
C9J6N9	UFD1	Ubiquitin recognition factor in ER-associated degradation protein 1 (Fragment) OS=Homo sapiens OX=9606 GN=UFD1 PE=1 SV=8	15.372	5.22677	2.38592	0.03797	0.434527	+	7	13.5303	13.6092	10.2845	10.8566	13.1609	11.0025	10.6147
C9J8U2	NAPRT	Nicotinate phosphoribosyltransferase OS=Homo sapiens OX=9606 GN=NAPRT PE=1 SV=1	52.162	1.45423	0.540253	0.005137	0.434527	+	7	13.3341	13.535	13.0888	12.8669	12.963	12.7496	12.8033
C9JE55	ATG7	Ubiquitin-like modifier-activating enzyme ATG7 (Fragment) OS=Homo sapiens OX=9606 GN=ATG7 PE=1 SV=1	13.767	2.64465	1.40308	0.03841	0.434527	+	7	10.9154	10.308	8.82102	8.99232	10.2846	8.6944	9.25081
C9JGI3	TYMP	Thymidine phosphorylase (Fragment) OS=Homo sapiens OX=9606 GN=TYMP PE=1 SV=1	46.087	2.11292	1.07924	0.03987	0.434527	+	7	15.7163	15.146	14.7212	14.0808	14.8762	14.3952	13.686
E5RIP7	IMPA1	Inositol-1-monophosphatase (Fragment) OS=Homo sapiens OX=9606 GN=IMPA1 PE=1 SV=8	19.925	1.84936	0.887027	0.003866	0.434527	+	7	13.6388	13.7631	12.7057	12.4832	12.9162	13.0887	12.8758
E7EQB2	LTF	Lactotransferrin (Fragment) OS=Homo sapiens OX=9606 GN=LTF PE=1 SV=1	76.626	2.70997	1.43828	0.03193	0.434527	+	7	17.9672	18.3478	16.9225	16.0515	17.6554	16.7592	16.2076
E7EX40	RAB11FIP1	Rab11 family-interacting protein 1 OS=Homo sapiens OX=9606 GN=RAB11FIP1 PE=1 SV=1	54.833	2.2102	1.14418	0.03917	0.434527	+	7	12.0312	12.2903	10.4519	10.7934	11.8457	11.2453	10.7467
E9PPM8	DERA	2-deoxy-D-ribose 5-phosphate aldolase OS=Homo sapiens OX=9606 GN=DERA PE=1 SV=1	30.517	3.10815	1.63605	0.04385	0.434527	+	7	12.2329	12.468	10.2309	9.95163	12.0589	10.7259	10.6047
E9PRL4	TRIM29	Tripartite motif-containing protein 29 OS=Homo sapiens OX=9606 GN=TRIM29 PE=1 SV=1	37.422	1.62246	0.69818	0.04902	0.434527	+	7	13.4446	13.3527	12.4426	12.588	13.3345	12.5608	12.5763
F5H1F6	VPS37B	Vacuolar protein sorting-associated protein 37B (Fragment) OS=Homo sapiens OX=9606 GN=VPS37B PE=1 SV=1	20.654	3.227	1.69019	0.04947	0.434527	+	7	12.7488	12.6493	10.7209	10.1978	12.4954	10.9502	10.6801
F6TLX2	GLOD4	Glyoxalase domain-containing protein 4 OS=Homo sapiens OX=9606 GN=GLOD4 PE=1 SV=1	54.72	1.27804	0.353938	0.04155	0.434527	+	7	15.7878	16.1111	15.7108	15.4628	15.7087	15.6476	15.4476
F8WAM2	CCT7	T-complex protein 1 subunit eta (Fragment) OS=Homo sapiens OX=9606 GN=CCT7 PE=1 SV=1	10.494	2.6943	1.42991	0.03013	0.434527	+	7	13.3448	13.3724	11.5936	11.0381	12.6605	12.0016	12.3496
H3BQF7	IST1	IST1 homolog (Fragment) OS=Homo sapiens OX=9606 GN=IST1 PE=1 SV=1	19.013	1.49448	0.579644	0.04039	0.434527	+	7	13.6033	13.9446	13.1148	12.8455	13.4885	13.3954	13.1274
H3BSW3	APRT	Adenine phosphoribosyltransferase OS=Homo sapiens OX=9606 GN=APRT PE=1 SV=1	6.919	2.55758	1.35478	0.001808	0.430033	+	7	13.5162	13.3894	12.0537	12.2873	12.0914	11.6381	12.4196
H7BZ35	DARS1	Aspartate--tRNA ligase, cytoplasmic (Fragment) OS=Homo sapiens OX=9606 GN=DARS1 PE=1 SV=1	21.608	3.84309	1.94227	0.03892	0.434527	+	7	11.901	11.7826	9.9438	8.98584	11.3786	9.96223	9.2271
H7BZH6	TP53I3	Quinone oxidoreductase PIG3 (Fragment) OS=Homo sapiens OX=9606 GN=TP53I3 PE=1 SV=1	22.654	1.7533	0.810073	0.02636	0.434527	+	7	12.2956	12.674	11.8259	11.8703	12.0099	11.3839	11.2836
H7C3P4	GNS	N-acetylglucosamine-6-sulfatase OS=Homo sapiens OX=9606 GN=GNS PE=1 SV=1	56.374	1.63792	0.711865	0.02053	0.434527	+	7	16.0156	16.2445	15.1569	15.2282	15.8574	15.4426	15.4058
I3L116	PRSS22	Brain-specific serine protease 4 OS=Homo sapiens OX=9606 GN=PRSS22 PE=1 SV=1	21.583	1.87572	0.907446	0.04633	0.434527	+	7	11.9491	11.7467	11.6611	10.8996	10.9841	10.4322	10.7254
J3KMY5	NPC2	Epididymal secretory protein E1 OS=Homo sapiens OX=9606 GN=NPC2 PE=1 SV=1	16.23	2.65242	1.40731	0.01157	0.434527	+	7	14.9912	14.9129	13.663	14.1459	13.8113	13.0781	13.0254
M0QXF7	MYDGF	Myeloid-derived growth factor (Fragment) OS=Homo sapiens OX=9606 GN=MYDGF PE=1 SV=1	9.671	2.39825	1.26198	0.02155	0.434527	+	7	15.2079	14.8652	13.6077	13.5477	14.6475	13.6613	13.4088
M0QZT2	PAFAH1B3	Platelet-activating factor acetylhydrolase IB subunit gamma (Fragment) OS=Homo sapiens OX=9606 GN=PAFAH1B3 PE=1 SV=8	15.545	2.28846	1.19437	0.001838	0.430033	+	7	11.089	11.0057	9.71923	9.52653	10.2321	9.83209	9.95485
O00160	MYO1F	Unconventional myosin-If OS=Homo sapiens OX=9606 GN=MYO1F PE=1 SV=3	124.844	1.59914	0.677299	0.03972	0.434527	+	7	14.5874	14.3467	13.4078	13.719	13.9824	13.6207	14.2186
O00291	HIP1	Huntingtin-interacting protein 1 OS=Homo sapiens OX=9606 GN=HIP1 PE=1 SV=5	116.221	2.71678	1.4419	0.0378	0.434527	+	7	12.4964	11.9775	10.3281	10.0218	11.7183	11.0862	10.8209
O00754	MAN2B1	Lysosomal alpha-mannosidase OS=Homo sapiens OX=9606 GN=MAN2B1 PE=1 SV=3	113.744	3.54103	1.82417	0.04535	0.434527	+	7	12.8051	13.2334	10.7305	10.7741	12.7924	11.0529	10.6255
O95274	LYPD3	Ly6/PLAUR domain-containing protein 3 OS=Homo sapiens OX=9606 GN=LYPD3 PE=1 SV=2	35.971	2.91368	1.54284	0.0005763	0.40341	+	7	14.5736	14.3744	13.0557	13.3045	12.6375	12.7958	12.8622
P00558	PGK1	Phosphoglycerate kinase 1 OS=Homo sapiens OX=9606 GN=PGK1 PE=1 SV=3	44.615	1.55176	0.633908	0.02053	0.434527	+	7	17.0114	16.6286	16.247	16.018	15.9085	16.3581	16.3989
P01714	IGLV3-19	Immunoglobulin lambda variable 3-19 OS=Homo sapiens OX=9606 GN=IGLV3-19 PE=1 SV=2	12.042	2.65028	1.40614	0.004261	0.434527	+	7	14.1493	13.7777	12.4902	12.2667	13.0691	12.2129	12.7479
P01877	IGHA2	Immunoglobulin heavy constant alpha 2 OS=Homo sapiens OX=9606 GN=IGHA2 PE=1 SV=4	36.591	2.19147	1.1319	0.0476	0.434527	+	7	13.2774	14.3831	13.0183	12.5312	13.1481	12.0678	12.7262
P01880	IGHD	Immunoglobulin heavy constant delta OS=Homo sapiens OX=9606 GN=IGHD PE=1 SV=3	42.353	15.6623	3.96922	0.03634	0.434527	+	7	13.9084	12.2605	9.13717	8.29162	12.1753	7.88114	8.09101
P02790	HPX	Hemopexin OS=Homo sapiens OX=9606 GN=HPX PE=1 SV=2	51.676	1.91283	0.935705	0.01743	0.434527	+	7	16.3244	16.5281	15.4111	15.3458	15.7658	15.0247	15.9054
P03973	SLPI	Antileukoproteinase OS=Homo sapiens OX=9606 GN=SLPI PE=1 SV=2	14.326	7.63162	2.93199	0.02425	0.434527	+	7	12.6227	14.7734	10.2373	11.2008	12.2585	9.91711	10.2165
P04004	VTN	Vitronectin OS=Homo sapiens OX=9606 GN=VTN PE=1 SV=1	54.306	2.7746	1.47228	0.0254	0.434527	+	7	12.9958	13.8177	11.6204	11.3686	12.6446	11.6414	12.3973
P04114	APOB	Apolipoprotein B-100 OS=Homo sapiens OX=9606 GN=APOB PE=1 SV=2	515.605	2.50196	1.32306	0.01446	0.434527	+	7	16.977	17.7872	15.8428	15.6564	16.5033	16.4457	15.847
P04406	GAPDH	Glyceraldehyde-3-phosphate dehydrogenase OS=Homo sapiens OX=9606 GN=GAPDH PE=1 SV=3	36.053	1.67048	0.740266	0.03736	0.434527	+	7	17.0043	17.7021	16.9716	16.4382	16.5618	16.3463	16.7468
P05109	S100A8	Protein S100-A8 OS=Homo sapiens OX=9606 GN=S100A8 PE=1 SV=1	10.835	9.1604	3.19541	0.002347	0.434527	+	7	17.9551	17.3633	13.9038	14.7818	15.5341	13.751	14.3483
P05114	HMGN1	Non-histone chromosomal protein HMG-14 OS=Homo sapiens OX=9606 GN=HMGN1 PE=1 SV=3	10.659	2.31017	1.208	0.04796	0.434527	+	7	13.4036	13.1865	11.5516	11.5195	12.6076	12.8595	11.8971
P05198	EIF2S1	Eukaryotic translation initiation factor 2 subunit 1 OS=Homo sapiens OX=9606 GN=EIF2S1 PE=1 SV=3	36.112	1.54879	0.631139	0.005902	0.434527	+	7	11.5353	11.179	10.8056	10.6099	10.8197	10.8413	10.5535
P06702	S100A9	Protein S100-A9 OS=Homo sapiens OX=9606 GN=S100A9 PE=1 SV=1	13.242	6.91878	2.79052	0.0004824	0.40341	+	7	17.4249	17.3037	14.1703	14.4271	15.3585	14.342	14.5711
P07355	ANXA2	Annexin A2 OS=Homo sapiens OX=9606 GN=ANXA2 PE=1 SV=2	38.604	1.91286	0.935734	0.01233	0.434527	+	7	13.5334	14.1275	12.5646	12.8352	13.2619	12.9491	12.8627
P08133	ANXA6	Annexin A6 OS=Homo sapiens OX=9606 GN=ANXA6 PE=1 SV=3	75.873	6.70205	2.7446	0.04774	0.434527	+	7	15.9163	15.0602	11.8712	11.157	14.0416	14.2996	12.3489
P09467	FBP1	Fructose-1,6-bisphosphatase 1 OS=Homo sapiens OX=9606 GN=FBP1 PE=1 SV=5	36.842	1.53874	0.621753	0.02474	0.434527	+	7	12.7417	12.6614	11.871	11.9386	12.5043	12.1535	11.9317
P18510	IL1RN	Interleukin-1 receptor antagonist protein OS=Homo sapiens OX=9606 GN=IL1RN PE=1 SV=1	20.055	2.42148	1.27589	0.03446	0.434527	+	7	14.69	15.1873	14.214	14.1498	13.704	12.8494	13.3966
P22894	MMP8	Neutrophil collagenase OS=Homo sapiens OX=9606 GN=MMP8 PE=1 SV=1	53.412	2.12694	1.08878	0.03166	0.434527	+	7	15.7939	15.2951	13.6886	14.4048	14.8005	14.586	14.7986
P25311	AZGP1	Zinc-alpha-2-glycoprotein OS=Homo sapiens OX=9606 GN=AZGP1 PE=1 SV=2	34.259	1.60224	0.680092	0.04627	0.434527	+	7	17.4601	18.1194	16.9354	17.5316	16.9831	16.9332	17.1649
P25787	PSMA2	Proteasome subunit alpha type-2 OS=Homo sapiens OX=9606 GN=PSMA2 PE=1 SV=2	25.899	1.50371	0.58853	0.03115	0.434527	+	7	11.3606	11.7788	10.8102	10.6985	11.0952	11.2321	11.0699
P26447	S100A4	Protein S100-A4 OS=Homo sapiens OX=9606 GN=S100A4 PE=1 SV=1	11.729	2.41562	1.2724	0.0336	0.434527	+	7	14.9951	14.6048	13.1123	12.8229	14.2299	13.8863	13.5864
P27105	STOM	Erythrocyte band 7 integral membrane protein OS=Homo sapiens OX=9606 GN=STOM PE=1 SV=3	31.731	2.76261	1.46603	0.04462	0.434527	+	7	11.7819	11.6874	9.47238	10.3458	11.4176	10.2823	9.82484
P27695	APEX1	DNA-(apurinic or apyrimidinic site) endonuclease OS=Homo sapiens OX=9606 GN=APEX1 PE=1 SV=2	35.555	5.88732	2.55761	0.02455	0.434527	+	7	14.7866	14.905	11.9847	11.7007	14.1708	12.0585	11.526
P30086	PEBP1	Phosphatidylethanolamine-binding protein 1 OS=Homo sapiens OX=9606 GN=PEBP1 PE=1 SV=3	21.057	1.35677	0.440175	0.04603	0.434527	+	7	14.7798	15.0692	14.6484	14.7008	14.492	14.3517	14.2286
P31153	MAT2A	S-adenosylmethionine synthase isoform type-2 OS=Homo sapiens OX=9606 GN=MAT2A PE=1 SV=1	43.661	1.53163	0.615072	0.02859	0.434527	+	7	12.7386	12.6534	12.1638	11.658	12.3563	12.2233	12.0032
P31948	STIP1	Stress-induced-phosphoprotein 1 OS=Homo sapiens OX=9606 GN=STIP1 PE=1 SV=1	62.639	4.65785	2.21966	0.04544	0.434527	+	7	15.4048	14.7523	13.3392	11.6292	14.451	12.726	12.1489
P35754	GLRX	Glutaredoxin-1 OS=Homo sapiens OX=9606 GN=GLRX PE=1 SV=2	11.776	2.62978	1.39494	0.04364	0.434527	+	7	13.2268	13.0203	11.6167	11.1484	12.9156	11.6006	11.3618
P36222	CHI3L1	Chitinase-3-like protein 1 OS=Homo sapiens OX=9606 GN=CHI3L1 PE=1 SV=2	42.625	12.5614	3.65092	0.0358	0.434527	+	7	16.2372	16.1969	11.305	13.3438	15.2363	11.4729	11.4728
P42126	ECI1	Enoyl-CoA delta isomerase 1, mitochondrial OS=Homo sapiens OX=9606 GN=ECI1 PE=1 SV=1	32.816	1.54546	0.628035	0.01937	0.434527	+	7	11.6555	11.4996	11.2093	10.7898	11.0339	10.6173	11.0974
P42768	WAS	Wiskott-Aldrich syndrome protein OS=Homo sapiens OX=9606 GN=WAS PE=1 SV=4	52.913	4.1093	2.03889	0.04105	0.434527	+	7	11.7843	11.8886	8.59733	9.66152	11.3643	9.79348	9.57117
P43652	AFM	Afamin OS=Homo sapiens OX=9606 GN=AFM PE=1 SV=1	69.069	2.71871	1.44292	0.01601	0.434527	+	7	12.6433	13.0133	11.506	10.9173	12.1436	10.8604	11.4995
P47755	CAPZA2	F-actin-capping protein subunit alpha-2 OS=Homo sapiens OX=9606 GN=CAPZA2 PE=1 SV=3	32.949	2.49479	1.31892	0.0316	0.434527	+	7	13.7945	14.1415	12.7512	12.1991	13.6239	12.3239	12.3472
P52790	HK3	Hexokinase-3 OS=Homo sapiens OX=9606 GN=HK3 PE=1 SV=2	99.025	2.32124	1.2149	0.01762	0.434527	+	7	14.0532	14.03	12.4653	12.2679	13.4389	12.9355	13.0258
P55008	AIF1	Allograft inflammatory factor 1 OS=Homo sapiens OX=9606 GN=AIF1 PE=1 SV=1	16.703	4.99059	2.31921	0.01888	0.434527	+	7	14.5324	14.5565	12.4178	11.3818	13.5937	12.3192	11.4138
P59666	DEFA3	Neutrophil defensin 3 OS=Homo sapiens OX=9606 GN=DEFA3 PE=1 SV=1	10.245	2.84874	1.51033	0.01859	0.434527	+	7	13.2066	13.0588	11.2666	11.0306	11.8314	12.5296	11.4534
P61626	LYZ	Lysozyme C OS=Homo sapiens OX=9606 GN=LYZ PE=1 SV=1	16.537	9.33024	3.22191	0.006263	0.434527	+	7	14.7844	17.0864	12.8865	11.9855	13.3482	12.6088	12.7384
P62906	RPL10A	60S ribosomal protein L10a OS=Homo sapiens OX=9606 GN=RPL10A PE=1 SV=2	24.831	7.77981	2.95973	0.005499	0.434527	+	7	13.4528	13.3404	9.76666	10.3632	11.8201	10.5008	9.7335
P80188	LCN2	Neutrophil gelatinase-associated lipocalin OS=Homo sapiens OX=9606 GN=LCN2 PE=1 SV=2	22.588	1.68557	0.753234	0.02527	0.434527	+	7	16.557	16.5241	15.495	15.3884	15.9853	16.0065	16.0614
P80511	S100A12	Protein S100-A12 OS=Homo sapiens OX=9606 GN=S100A12 PE=1 SV=2	10.575	6.38122	2.67383	0.004421	0.434527	+	7	15.9758	16.1057	12.5791	12.999	13.932	14.3167	13.0077
Q12882	DPYD	Dihydropyrimidine dehydrogenase [NADP(+)] OS=Homo sapiens OX=9606 GN=DPYD PE=1 SV=2	111.401	6.37097	2.67151	0.02659	0.434527	+	7	13.2845	12.9663	10.1592	10.0017	12.478	9.91804	9.71262
Q13451	FKBP5	Peptidyl-prolyl cis-trans isomerase FKBP5 OS=Homo sapiens OX=9606 GN=FKBP5 PE=1 SV=2	51.212	1.86243	0.897183	0.0393	0.434527	+	7	11.9837	11.3209	10.2597	10.6039	11.0035	11.1988	10.7097
Q15233	NONO	Non-POU domain-containing octamer-binding protein OS=Homo sapiens OX=9606 GN=NONO PE=1 SV=4	54.232	1.95611	0.967986	0.04204	0.434527	+	7	10.4988	10.9111	9.26923	9.44595	10.3654	10.0432	9.56096
Q16555	DPYSL2	Dihydropyrimidinase-related protein 2 OS=Homo sapiens OX=9606 GN=DPYSL2 PE=1 SV=1	62.294	1.61395	0.690594	0.04055	0.434527	+	7	13.4807	12.7956	12.0843	12.3944	12.4944	12.7103	12.5543
Q5EG05	CARD16	Caspase recruitment domain-containing protein 16 OS=Homo sapiens OX=9606 GN=CARD16 PE=1 SV=1	22.625	1.81553	0.860387	0.04817	0.434527	+	7	13.2745	13.0844	12.5707	12.1058	11.9043	12.9609	12.0536
Q5H9A7	TIMP1	Metalloproteinase inhibitor 1 OS=Homo sapiens OX=9606 GN=TIMP1 PE=1 SV=1	16.057	3.24108	1.69647	0.02729	0.434527	+	7	15.2933	16.1721	13.6452	14.1706	14.9499	13.1827	14.2328
Q8WW12	PCNP	PEST proteolytic signal-containing nuclear protein OS=Homo sapiens OX=9606 GN=PCNP PE=1 SV=2	18.925	1.77113	0.82467	0.02072	0.434527	+	7	11.0726	11.4151	10.8934	10.0451	10.3767	10.4627	10.3181
Q96NY8	NECTIN4	Nectin-4 OS=Homo sapiens OX=9606 GN=NECTIN4 PE=1 SV=1	55.454	1.86662	0.900426	0.02914	0.434527	+	7	13.0102	13.0579	12.0277	11.9709	12.8245	11.808	12.0371
Q99497	PARK7	Parkinson disease protein 7 OS=Homo sapiens OX=9606 GN=PARK7 PE=1 SV=2	19.891	1.64403	0.717239	0.006761	0.434527	+	7	13.9409	13.8586	13.0834	13.0556	13.4643	13.3497	12.9597
Q9BZM5	ULBP2	UL16-binding protein 2 OS=Homo sapiens OX=9606 GN=ULBP2 PE=1 SV=1	27.368	3.63038	1.86012	0.02768	0.434527	+	7	10.9763	11.2788	9.09814	8.86405	10.6745	9.01073	8.68983
Q9H4M9	EHD1	EH domain-containing protein 1 OS=Homo sapiens OX=9606 GN=EHD1 PE=1 SV=2	60.627	2.48824	1.31513	0.03512	0.434527	+	7	12.5165	12.4931	10.4409	10.8402	12.0422	11.4901	11.1352
Q9H8S9	MOB1A	MOB kinase activator 1A OS=Homo sapiens OX=9606 GN=MOB1A PE=1 SV=4	25.08	3.82895	1.93695	0.02677	0.434527	+	7	11.6827	11.4983	9.5674	9.05988	11.1048	9.30682	9.22877
Q9Y617	PSAT1	Phosphoserine aminotransferase OS=Homo sapiens OX=9606 GN=PSAT1 PE=1 SV=2	40.423	3.11138	1.63755	0.02104	0.434527	+	7	13.4226	13.0862	11.6747	10.6497	12.4776	11.6729	11.6092
R4GN49	S100A2	Protein S100-A2 OS=Homo sapiens OX=9606 GN=S100A2 PE=1 SV=1	7.324	4.62728	2.21017	0.02806	0.434527	+	7	15.9116	15.0593	14.5008	13.4382	13.6488	12.1299	12.6587
K7ES42	SAFB	Scaffold attachment factor B1 OS=Homo sapiens OX=9606 GN=SAFB PE=1 SV=1	11.594	1.81755	0.861991	0.0417	0.434527	+	3	10.1512	10.086	NA	NA	9.25661	NA	NA
P02760	AMBP	Protein AMBP OS=Homo sapiens OX=9606 GN=AMBP PE=1 SV=1	38.999	2.07685	1.05439	0.01599	0.434527	+	3	13.532	13.5014	NA	NA	12.4623	NA	NA
Q15075	EEA1	Early endosome antigen 1 OS=Homo sapiens OX=9606 GN=EEA1 PE=1 SV=2	162.466	1.54651	0.629015	0.01355	0.434527	+	3	10.2193	10.2038	NA	NA	9.58256	NA	NA
Q9GZM7	TINAGL1	Tubulointerstitial nephritis antigen-like OS=Homo sapiens OX=9606 GN=TINAGL1 PE=1 SV=1	52.387	1.6564	0.728054	0.02183	0.434527	+	3	8.8192	8.79036	NA	NA	8.07672	NA	NA
Q9HD89	RETN	Resistin OS=Homo sapiens OX=9606 GN=RETN PE=1 SV=1	11.419	2.00076	1.00055	0.0275	0.434527	+	3	9.23205	9.18211	NA	NA	8.20653	NA	NA
X6RGC9	TYROBP	DNAX-activation protein 12 OS=Homo sapiens OX=9606 GN=TYROBP PE=1 SV=1	10.972	1.59238	0.67118	0.01228	0.434527	+	3	12.3059	12.3208	NA	NA	11.6422	NA	NA
A0A075B6K0	IGLV3-16	Immunoglobulin lambda variable 3-16 OS=Homo sapiens OX=9606 GN=IGLV3-16 PE=3 SV=2	12.466	0.473826	-1.07757	0.01479	0.434527	-	7	12.0513	12.7034	13.0554	13.5461	13.6329	13.2016	13.8385
A0A0C4DH29	IGHV1-3	Immunoglobulin heavy variable 1-3 OS=Homo sapiens OX=9606 GN=IGHV1-3 PE=3 SV=1	13.008	0.667469	-0.583226	0.04732	0.434527	-	7	10.6111	11.2262	11.4956	11.6139	11.2212	11.417	11.7613
A0A0C4DH33	IGHV1-24	Immunoglobulin heavy variable 1-24 OS=Homo sapiens OX=9606 GN=IGHV1-24 PE=3 SV=1	12.824	0.437655	-1.19213	0.02383	0.434527	-	7	10.2099	10.287	11.6041	11.9004	10.5977	11.4734	11.6274
A0A4W8ZXM2	IGHV3-72	Immunoglobulin heavy variable 3-72 OS=Homo sapiens OX=9606 GN=IGHV3-72 PE=1 SV=1	11.167	0.36385	-1.45859	0.0414	0.434527	-	7	11.095	11.5474	12.9569	13.5125	11.6636	13.1117	12.6539
A6ZIE4	MUC1	MUC1 isoform M10 OS=Homo sapiens OX=9606 GN=MUC1 PE=1 SV=1	20.037	0.683579	-0.548819	0.03238	0.434527	-	7	10.3101	10.8123	11.1001	11.1856	10.8675	11.0515	11.3452
B5MBZ8	PPP1R7	Protein phosphatase 1 regulatory subunit 7 OS=Homo sapiens OX=9606 GN=PPP1R7 PE=1 SV=1	31.357	0.215147	-2.21661	0.03215	0.434527	-	7	8.5772	8.93121	11.7834	11.3428	9.22868	11.2694	11.2298
C9JFR7	CYCS	Cytochrome c (Fragment) OS=Homo sapiens OX=9606 GN=CYCS PE=1 SV=1	11.333	0.122523	-3.02887	0.04933	0.434527	-	7	9.834	10.3322	14.0726	14.1767	10.7504	12.2758	14.2845
F5GWX2	HEBP1	Heme-binding protein 1 OS=Homo sapiens OX=9606 GN=HEBP1 PE=1 SV=1	14.72	0.323589	-1.62776	0.04808	0.434527	-	7	11.4607	10.1027	13.0261	12.4513	11.2602	12.81	12.4999
H3BTA2	PPP4C	Serine/threonine-protein phosphatase (Fragment) OS=Homo sapiens OX=9606 GN=PPP4C PE=1 SV=1	30.562	0.483147	-1.04947	0.03323	0.434527	-	7	10.3415	10.0595	11.2642	11.688	10.4562	11.4747	11.3668
K7ESE8	BLMH	Bleomycin hydrolase (Fragment) OS=Homo sapiens OX=9606 GN=BLMH PE=1 SV=1	26.739	0.129969	-2.94376	0.03337	0.434527	-	7	9.07331	8.78702	12.5321	13.1555	9.61259	12.1443	11.9251
P00505	GOT2	Aspartate aminotransferase, mitochondrial OS=Homo sapiens OX=9606 GN=GOT2 PE=1 SV=3	47.518	0.477086	-1.06768	0.03455	0.434527	-	7	11.9553	11.932	13.3196	12.9377	12.1863	13.1938	13.4192
P10155	RO60	60 kDa SS-A/Ro ribonucleoprotein OS=Homo sapiens OX=9606 GN=RO60 PE=1 SV=2	60.671	0.0410115	-4.60783	0.007976	0.434527	-	7	6.69037	6.88607	12.0514	11.6346	8.89066	12.5596	11.844
P11047	LAMC1	Laminin subunit gamma-1 OS=Homo sapiens OX=9606 GN=LAMC1 PE=1 SV=3	177.603	0.24175	-2.04841	0.0283	0.434527	-	7	8.96541	9.18557	11.4505	12.0703	9.71781	10.8731	11.5078
P11233	RALA	Ras-related protein Ral-A OS=Homo sapiens OX=9606 GN=RALA PE=1 SV=1	23.567	0.688215	-0.539069	0.04504	0.434527	-	7	14.1578	14.2105	14.5904	15.0829	14.357	14.8224	14.7634
P13798	APEH	Acylamino-acid-releasing enzyme OS=Homo sapiens OX=9606 GN=APEH PE=1 SV=4	81.225	0.67459	-0.567916	0.001606	0.430033	-	7	14.7322	14.6291	15.4529	15.1971	15.2367	15.1655	15.1905
P26572	MGAT1	Alpha-1,3-mannosyl-glycoprotein 2-beta-N-acetylglucosaminyltransferase OS=Homo sapiens OX=9606 GN=MGAT1 PE=1 SV=2	50.878	0.316443	-1.65998	0.01724	0.434527	-	7	11.5175	11.8038	13.5461	13.8632	12.6533	12.6507	13.8899
P31025	LCN1	Lipocalin-1 OS=Homo sapiens OX=9606 GN=LCN1 PE=1 SV=1	19.25	0.413731	-1.27323	0.01724	0.434527	-	7	12.4014	12.3894	12.9875	13.976	14.2581	13.4746	13.6469
P31944	CASP14	Caspase-14 OS=Homo sapiens OX=9606 GN=CASP14 PE=1 SV=2	27.68	0.166193	-2.58907	0.02629	0.434527	-	7	12.9381	12.4476	16.4082	15.8818	13.5055	15.3997	15.2143
P51148	RAB5C	Ras-related protein Rab-5C OS=Homo sapiens OX=9606 GN=RAB5C PE=1 SV=2	23.483	0.267617	-1.90176	0.03527	0.434527	-	7	11.899	11.7566	13.9671	14.0679	12.1674	14.075	14.3702
P51993	FUT6	4-galactosyl-N-acetylglucosaminide 3-alpha-L-fucosyltransferase FUT6 OS=Homo sapiens OX=9606 GN=FUT6 PE=1 SV=1	41.86	0.18256	-2.45356	0.01952	0.434527	-	7	11.5408	11.5072	14.5072	14.8578	12.4518	13.6129	14.4579
P55064	AQP5	Aquaporin-5 OS=Homo sapiens OX=9606 GN=AQP5 PE=1 SV=1	28.292	0.297245	-1.75027	0.001843	0.430033	-	7	9.71239	9.97422	11.6512	11.7278	10.9299	11.835	11.8239
P81605	DCD	Dermcidin OS=Homo sapiens OX=9606 GN=DCD PE=1 SV=2	11.284	0.121601	-3.03977	0.03247	0.434527	-	7	11.8707	12.3386	15.8456	16.7027	13.1505	14.4526	15.5705
P84077	ARF1	ADP-ribosylation factor 1 OS=Homo sapiens OX=9606 GN=ARF1 PE=1 SV=2	20.697	0.437838	-1.19153	0.01073	0.434527	-	7	12.3564	12.3524	14.1792	13.4634	13.2276	13.1951	13.6642
Q00610	CLTC	Clathrin heavy chain 1 OS=Homo sapiens OX=9606 GN=CLTC PE=1 SV=5	191.615	0.159001	-2.65289	0.01743	0.434527	-	7	8.61453	8.16451	11.5956	11.2298	9.29731	11.7998	11.2896
Q13217	DNAJC3	DnaJ homolog subfamily C member 3 OS=Homo sapiens OX=9606 GN=DNAJC3 PE=1 SV=1	57.58	0.270795	-1.88472	0.02793	0.434527	-	7	10.6423	11.7734	13.4112	13.7986	11.8905	13.1753	13.1874
Q13421	MSLN	Mesothelin OS=Homo sapiens OX=9606 GN=MSLN PE=1 SV=2	68.986	0.373278	-1.42168	0.0303	0.434527	-	7	12.8721	12.4187	14.1893	14.6531	13.4887	13.3673	14.637
Q5SGD2	PPM1L	Protein phosphatase 1L OS=Homo sapiens OX=9606 GN=PPM1L PE=1 SV=1	41.053	0.440979	-1.18122	0.03273	0.434527	-	7	10.2238	10.9125	11.9264	12.3608	11.1144	11.4426	11.9025
Q5TAE8	ERO1B	ERO1-like protein beta (Fragment) OS=Homo sapiens OX=9606 GN=ERO1B PE=1 SV=1	19.966	0.490032	-1.02905	0.008518	0.434527	-	7	9.09473	9.29092	10.6005	10.5125	10.1127	10.0247	9.85901
Q5VTE0	EEF1A1P5	Putative elongation factor 1-alpha-like 3 OS=Homo sapiens OX=9606 GN=EEF1A1P5 PE=5 SV=1	50.185	0.270206	-1.88787	0.04532	0.434527	-	7	11.9043	11.5939	14.687	13.9625	12.1043	13.6861	13.7449
Q6RW13	AGTRAP	Type-1 angiotensin II receptor-associated protein OS=Homo sapiens OX=9606 GN=AGTRAP PE=1 SV=1	17.419	0.493927	-1.01763	0.04928	0.434527	-	7	9.23004	9.43839	10.451	11.0968	9.82322	9.88313	10.5051
Q96C23	GALM	Galactose mutarotase OS=Homo sapiens OX=9606 GN=GALM PE=1 SV=1	37.766	0.662619	-0.593748	0.02623	0.434527	-	7	12.121	12.0873	12.6505	12.8053	12.2813	12.8169	12.9355
Q99471	PFDN5	Prefoldin subunit 5 OS=Homo sapiens OX=9606 GN=PFDN5 PE=1 SV=2	17.328	0.389926	-1.35873	0.0343	0.434527	-	7	11.9685	12.0094	13.701	13.4543	12.2511	13.8068	13.5251
Q9BTY2	FUCA2	Plasma alpha-L-fucosidase OS=Homo sapiens OX=9606 GN=FUCA2 PE=1 SV=2	54.067	0.031159	-5.00421	0.02236	0.434527	-	7	8.08852	7.94957	14.2395	14.2619	9.41243	13.4202	13.7823
Q9UBG3	CRNN	Cornulin OS=Homo sapiens OX=9606 GN=CRNN PE=1 SV=1	53.533	0.292979	-1.77113	0.04207	0.434527	-	7	13.4792	13.1973	15.4984	15.9558	14.0827	14.2777	15.7326
Q9UBS3	DNAJB9	DnaJ homolog subfamily B member 9 OS=Homo sapiens OX=9606 GN=DNAJB9 PE=1 SV=1	25.518	0.544171	-0.877867	0.04625	0.434527	-	7	9.13449	9.38598	9.47134	10.135	10.4173	10.6183	10.0486
Q9UBX1	CTSF	Cathepsin F OS=Homo sapiens OX=9606 GN=CTSF PE=1 SV=1	53.366	0.285266	-1.80962	0.04108	0.434527	-	7	12.423	12.4726	15.2652	14.8925	13.2988	13.388	14.4425
A0A087WW92	GRIPAP1	GRIP1-associated protein 1 (Fragment) OS=Homo sapiens OX=9606 GN=GRIPAP1 PE=1 SV=6	7.604	0.593928	-0.751641	0.04337	0.434527	-	3	9.97831	10.0375	NA	NA	10.7596	NA	NA
A0A087WY82	F11R	Junctional adhesion molecule 1 OS=Homo sapiens OX=9606 GN=F11R PE=1 SV=1	30.197	0.591702	-0.757058	0.04954	0.434527	-	3	12.8949	12.8268	NA	NA	13.6179	NA	NA
A0A0U1RQT1	ACAP2	Arf-GAP with coiled-coil, ANK repeat and PH domain-containing protein 2 (Fragment) OS=Homo sapiens OX=9606 GN=ACAP2 PE=1 SV=1	62.842	0.793123	-0.334383	0.02457	0.434527	-	3	8.2122	8.22712	NA	NA	8.55404	NA	NA
I3L3G9	NDE1	Nuclear distribution protein nudE homolog 1 OS=Homo sapiens OX=9606 GN=NDE1 PE=1 SV=1	15.143	0.523824	-0.932846	0.01306	0.434527	-	3	10.2394	10.2173	NA	NA	11.1612	NA	NA
O43923	MMP25	Matrix metalloproteinase-25 OS=Homo sapiens OX=9606 GN=MMP25 PE=1 SV=1	20.354	0.762498	-0.391195	0.03393	0.434527	-	3	10.3284	10.3525	NA	NA	10.7317	NA	NA
P06753	TPM3	Tropomyosin alpha-3 chain OS=Homo sapiens OX=9606 GN=TPM3 PE=1 SV=2	32.95	0.518085	-0.948739	0.02718	0.434527	-	3	10.6623	10.6155	NA	NA	11.5877	NA	NA

## Sheet: D_HC
Accession	Gene	Description	Mw(kDa)	Corrected D/H	log2 D/H	P-value	P.adjust	Diff Sig	Count	1	4	9	H-10	H-11	H-16	H-7	H-9
F5H4Q7	GRIP1	Glutamate receptor-interacting protein 1 (Fragment) OS=Homo sapiens OX=9606 GN=GRIP1 PE=1 SV=1	84.155	7.68167	2.94142	0.02737	0.997614	+	8	16.8155	13.3943	14.9524	11.3248	13.0882	12.5321	13.1841	10.434
G3V2H2	KLHDC2	Kelch domain-containing protein 2 OS=Homo sapiens OX=9606 GN=KLHDC2 PE=1 SV=1	34.884	7.64579	2.93467	0.01005	0.817998	+	6	15.1802	14.3996	NA	11.8821	12.6332	NA	12.1381	10.7677
P80511	S100A12	Protein S100-A12 OS=Homo sapiens OX=9606 GN=S100A12 PE=1 SV=2	10.575	5.6082	2.48754	0.009503	0.817998	+	8	16.4854	16.5984	14.4795	12.5791	12.999	13.932	14.3167	13.0077
P03973	SLPI	Antileukoproteinase OS=Homo sapiens OX=9606 GN=SLPI PE=1 SV=2	14.326	5.36294	2.42302	0.005818	0.69908	+	8	13.0369	13.1469	13.3835	10.2373	11.2008	12.2585	9.91711	10.2165
Q7Z5R6	APBB1IP	Amyloid beta A4 precursor protein-binding family B member 1-interacting protein OS=Homo sapiens OX=9606 GN=APBB1IP PE=1 SV=1	73.183	4.47545	2.16203	0.004997	0.69908	+	6	13.9768	13.7793	NA	12.035	11.0068	NA	11.6932	12.129
P05109	S100A8	Protein S100-A8 OS=Homo sapiens OX=9606 GN=S100A8 PE=1 SV=1	10.835	3.96125	1.98595	0.00643	0.69908	+	8	17.0448	16.2929	16.0115	13.9038	14.7818	15.5341	13.751	14.3483
O95274	LYPD3	Ly6/PLAUR domain-containing protein 3 OS=Homo sapiens OX=9606 GN=LYPD3 PE=1 SV=2	35.971	3.94584	1.98033	0.005459	0.69908	+	8	14.0868	14.5579	16.0898	13.0557	13.3045	12.6375	12.7958	12.8622
A0A2R8YDY3	CD55	Complement decay-accelerating factor (Fragment) OS=Homo sapiens OX=9606 GN=CD55 PE=1 SV=1	21.495	3.29168	1.71883	0.00769	0.764268	+	6	11.3041	11.8014	NA	10.0996	9.93192	NA	10.082	9.22208
P53367	ARFIP1	Arfaptin-1 OS=Homo sapiens OX=9606 GN=ARFIP1 PE=1 SV=2	41.738	3.0727	1.6195	0.02423	0.997614	+	8	16.0155	14.531	14.2206	13.1385	13.1806	13.8005	13.9528	12.4419
E9PN89	HSPA8	Heat shock cognate 71 kDa protein (Fragment) OS=Homo sapiens OX=9606 GN=HSPA8 PE=1 SV=1	34.819	2.97659	1.57366	0.01667	0.997614	+	8	12.8772	11.7201	12.0838	10.0191	10.3618	11.4019	11.3804	10.1036
P06702	S100A9	Protein S100-A9 OS=Homo sapiens OX=9606 GN=S100A9 PE=1 SV=1	13.242	2.8508	1.51137	0.003842	0.69908	+	8	16.5889	15.8416	15.825	14.1703	14.4271	15.3585	14.342	14.5711
P61626	LYZ	Lysozyme C OS=Homo sapiens OX=9606 GN=LYZ PE=1 SV=1	16.537	2.7452	1.45691	0.00519	0.69908	+	8	14.3958	13.7032	14.4122	12.8865	11.9855	13.3482	12.6088	12.7384
Q14508	WFDC2	WAP four-disulfide core domain protein 2 OS=Homo sapiens OX=9606 GN=WFDC2 PE=1 SV=2	12.993	2.64355	1.40247	0.003532	0.69908	+	8	13.122	12.6493	13.5586	12.0712	12.0652	11.4057	11.7925	11.2029
Q9NQC3	RTN4	Reticulon-4 OS=Homo sapiens OX=9606 GN=RTN4 PE=1 SV=2	129.931	2.21872	1.14973	0.04642	0.997614	+	8	13.5946	13.139	12.7665	11.5037	11.4835	12.2142	13.1781	11.7053
Q9H4M9	EHD1	EH domain-containing protein 1 OS=Homo sapiens OX=9606 GN=EHD1 PE=1 SV=2	60.627	2.21743	1.14889	0.03886	0.997614	+	8	12.9706	12.1617	11.8835	10.4409	10.8402	12.0422	11.4901	11.1352
J3KMY5	NPC2	Epididymal secretory protein E1 OS=Homo sapiens OX=9606 GN=NPC2 PE=1 SV=1	16.23	2.02183	1.01566	0.02971	0.997614	+	8	14.4265	14.1364	15.1182	13.663	14.1459	13.8113	13.0781	13.0254
Q96RF0	SNX18	Sorting nexin-18 OS=Homo sapiens OX=9606 GN=SNX18 PE=1 SV=2	68.894	1.60202	0.67989	0.006077	0.69908	+	6	10.1659	9.98574	NA	9.29969	9.38809	NA	9.27952	9.61636
A6ZIE4	MUC1	MUC1 isoform M10 OS=Homo sapiens OX=9606 GN=MUC1 PE=1 SV=1	20.037	1.5236	0.607488	0.00182	0.69908	+	8	11.591	11.7893	11.7722	11.1001	11.1856	10.8675	11.0515	11.3452
P25311	AZGP1	Zinc-alpha-2-glycoprotein OS=Homo sapiens OX=9606 GN=AZGP1 PE=1 SV=2	34.259	1.48449	0.569972	0.02425	0.997614	+	8	17.9641	17.4186	17.6561	16.9354	17.5316	16.9831	16.9332	17.1649
Q7Z6P3	RAB44	Ras-related protein Rab-44 OS=Homo sapiens OX=9606 GN=RAB44 PE=1 SV=4	110.85	1.45886	0.544846	0.03634	0.997614	+	8	11.8497	11.8977	11.2536	11.108	10.8002	11.209	11.425	11.0686
H3BQF7	IST1	IST1 homolog (Fragment) OS=Homo sapiens OX=9606 GN=IST1 PE=1 SV=1	19.013	1.42174	0.507659	0.0416	0.997614	+	8	13.8288	13.9132	13.3638	13.1148	12.8455	13.4885	13.3954	13.1274
P61981	YWHAG	14-3-3 protein gamma OS=Homo sapiens OX=9606 GN=YWHAG PE=1 SV=2	28.303	0.824204	-0.278927	0.03632	0.997614	-	8	14.4937	14.4983	14.2415	14.8259	14.5226	14.8412	14.6001	14.6608
E9PEX6	DLD	Dihydrolipoyl dehydrogenase OS=Homo sapiens OX=9606 GN=DLD PE=1 SV=1	51.815	0.668521	-0.580955	0.04702	0.997614	-	8	13.3317	13.5987	12.9478	14.0292	13.9376	13.6062	13.5128	14.2825
P00450	CP	Ceruloplasmin OS=Homo sapiens OX=9606 GN=CP PE=1 SV=1	122.205	0.66194	-0.595228	0.01013	0.817998	-	8	15.5116	15.2753	15.6787	16.0508	16.0832	15.7517	16.1411	16.392
A0A5F9ZH78	ARG1	Arginase-1 OS=Homo sapiens OX=9606 GN=ARG1 PE=1 SV=1	25.661	0.596273	-0.745954	0.0401	0.997614	-	8	14.2456	15.4444	14.3872	15.4028	15.3082	15.5997	15.5302	15.3509
P01743	IGHV1-46	Immunoglobulin heavy variable 1-46 OS=Homo sapiens OX=9606 GN=IGHV1-46 PE=1 SV=2	12.933	0.592572	-0.754938	0.01165	0.8854	-	8	11.828	11.4928	12.4063	12.696	12.6579	12.6776	12.4554	12.8329
P04217	A1BG	Alpha-1B-glycoprotein OS=Homo sapiens OX=9606 GN=A1BG PE=1 SV=4	54.254	0.574715	-0.799081	0.04657	0.997614	-	8	13.8142	13.6289	14.465	14.4365	14.83	14.8267	14.3158	15.4333
P34059	GALNS	N-acetylgalactosamine-6-sulfatase OS=Homo sapiens OX=9606 GN=GALNS PE=1 SV=1	58.026	0.55364	-0.85298	0.04311	0.997614	-	8	12.5686	12.326	12.2985	13.1323	12.8342	12.7087	14.0603	13.518
P01023	A2M	Alpha-2-macroglobulin OS=Homo sapiens OX=9606 GN=A2M PE=1 SV=3	163.291	0.526519	-0.925442	0.006493	0.69908	-	8	17.4875	17.2954	17.4862	18.3155	18.3879	17.7415	18.6126	18.6849
P20933	AGA	N(4)-(beta-N-acetylglucosaminyl)-L-asparaginase OS=Homo sapiens OX=9606 GN=AGA PE=1 SV=2	37.208	0.507639	-0.978124	0.02408	0.997614	-	8	12.2459	13.2361	13.3649	14.2847	14.2557	13.7994	13.5066	13.789
P04275	VWF	von Willebrand factor OS=Homo sapiens OX=9606 GN=VWF PE=1 SV=4	309.265	0.468818	-1.0929	0.03087	0.997614	-	8	11.7099	11.0313	12.1848	12.0568	12.396	12.8549	13.0388	13.3279
P02751	FN1	Fibronectin OS=Homo sapiens OX=9606 GN=FN1 PE=1 SV=5	272.32	0.448544	-1.15668	0.01925	0.997614	-	8	15.6165	15.1341	15.9339	16.5693	16.7921	16.5345	16.114	17.581
P01859	IGHG2	Immunoglobulin heavy constant gamma 2 OS=Homo sapiens OX=9606 GN=IGHG2 PE=1 SV=2	35.901	0.430067	-1.21737	0.004262	0.69908	-	8	15.9819	15.3228	15.5189	17.1585	16.7119	16.2076	16.9168	17.1312
Q5T985	ITIH2	Inter-alpha-trypsin inhibitor heavy chain H2 OS=Homo sapiens OX=9606 GN=ITIH2 PE=1 SV=1	105.216	0.417516	-1.2601	0.04609	0.997614	-	8	13.9144	13.255	13.7994	15.489	14.9488	13.9916	14.2519	15.9006
P01857	IGHG1	Immunoglobulin heavy constant gamma 1 OS=Homo sapiens OX=9606 GN=IGHG1 PE=1 SV=1	36.106	0.410633	-1.28408	0.003268	0.69908	-	8	17.7867	17.7329	17.6021	19.0177	19.0622	18.6442	18.5425	19.6899
P69891	HBG1	Hemoglobin subunit gamma-1 OS=Homo sapiens OX=9606 GN=HBG1 PE=1 SV=2	16.14	0.406268	-1.2995	0.04108	0.997614	-	6	11.3963	11.176	NA	13.3147	12.2694	NA	12.0058	12.7528
V9GYE3	APOA2	Apolipoprotein A-II OS=Homo sapiens OX=9606 GN=APOA2 PE=1 SV=1	5.877	0.401702	-1.3158	0.03469	0.997614	-	8	14.0797	13.2432	13.2734	15.0714	14.7005	13.6862	15.0957	15.6858
P01042	KNG1	Kininogen-1 OS=Homo sapiens OX=9606 GN=KNG1 PE=1 SV=2	71.957	0.392872	-1.34787	0.03693	0.997614	-	8	15.4912	14.721	14.6902	16.8511	16.3784	15.2665	15.8481	17.2327
P00915	CA1	Carbonic anhydrase 1 OS=Homo sapiens OX=9606 GN=CA1 PE=1 SV=2	28.87	0.341339	-1.55072	0.04411	0.997614	-	8	13.0704	14.1196	14.3721	15.0494	14.5415	14.7127	16.1783	16.5419
