# Supplementary material for: Proteomic characteristics of saliva in patients with different subgroups of IgG4-RD
Source: Front Immunol. 2022 Nov 22;13:1026921. doi: 10.3389/fimmu.2022.1026921 (PMC9723444; doi:10.3389/fimmu.2022.1026921)
Supplement: Supplementary Table 4 — DEPs identified in the comparisons between IgG4-RD and HC. [file Table_4.xlsx]

## Sheet: Table S4
Accession	Gene	Description	Mw(kDa)	Length	1/H	log2 1/H	P-value	P.adjust	Diff Sig
P60842	EIF4A1	Eukaryotic initiation factor 4A-I OS=Homo sapiens OX=9606 GN=EIF4A1 PE=1 SV=1	46.154	406	0.674363	-0.568402	0.001202	0.00835583	-
Q15113	PCOLCE	Procollagen C-endopeptidase enhancer 1 OS=Homo sapiens OX=9606 GN=PCOLCE PE=1 SV=2	47.972	449	1.29399	0.371831	0.02577	0.0492413	+
P05771	PRKCB	Protein kinase C beta type OS=Homo sapiens OX=9606 GN=PRKCB PE=1 SV=4	76.869	671	0.520229	-0.942782	0.003207	0.0120856	-
P60981	DSTN	Destrin OS=Homo sapiens OX=9606 GN=DSTN PE=1 SV=3	18.506	165	0.632226	-0.661488	0.002131	0.0101845	-
P06753	TPM3	Tropomyosin alpha-3 chain OS=Homo sapiens OX=9606 GN=TPM3 PE=1 SV=2	32.95	285	0.468883	-1.0927	0.002465	0.0105226	-
Q06033	ITIH3	Inter-alpha-trypsin inhibitor heavy chain H3 OS=Homo sapiens OX=9606 GN=ITIH3 PE=1 SV=2	99.849	890	1.69793	0.76378	0.00989	0.0243953	+
Q96JB5	CDK5RAP3	CDK5 regulatory subunit-associated protein 3 OS=Homo sapiens OX=9606 GN=CDK5RAP3 PE=1 SV=2	56.921	506	1.23481	0.304288	0.0366	0.0640697	+
Q99969	RARRES2	Retinoic acid receptor responder protein 2 OS=Homo sapiens OX=9606 GN=RARRES2 PE=1 SV=1	18.618	163	1.77032	0.824007	0.001338	0.00835583	+
P61026	RAB10	Ras-related protein Rab-10 OS=Homo sapiens OX=9606 GN=RAB10 PE=1 SV=1	22.541	200	0.591271	-0.758109	6.314e-05	0.0048901	-
P07203	GPX1	Glutathione peroxidase 1 OS=Homo sapiens OX=9606 GN=GPX1 PE=1 SV=4	22.088	203	0.815233	-0.294716	0.005596	0.0166246	-
P61163	ACTR1A	Alpha-centractin OS=Homo sapiens OX=9606 GN=ACTR1A PE=1 SV=1	42.614	376	0.640294	-0.643194	0.04906	0.0803518	-
Q99988	GDF15	Growth/differentiation factor 15 OS=Homo sapiens OX=9606 GN=GDF15 PE=1 SV=3	34.14	308	1.6729	0.742351	0.007783	0.0207038	+
P61224	RAP1B	Ras-related protein Rap-1b OS=Homo sapiens OX=9606 GN=RAP1B PE=1 SV=1	20.825	184	0.573265	-0.802727	0.001543	0.00890782	-
Q9BWP8	COLEC11	Collectin-11 OS=Homo sapiens OX=9606 GN=COLEC11 PE=1 SV=1	28.665	271	1.34142	0.423758	0.02251	0.0437936	+
P05090	APOD	Apolipoprotein D OS=Homo sapiens OX=9606 GN=APOD PE=1 SV=1	21.276	189	1.36421	0.44807	0.02972	0.0551072	+
P61978	HNRNPK	Heterogeneous nuclear ribonucleoprotein K OS=Homo sapiens OX=9606 GN=HNRNPK PE=1 SV=1	50.976	463	0.5766	-0.794357	0.002257	0.0104037	-
P01019	AGT	Angiotensinogen OS=Homo sapiens OX=9606 GN=AGT PE=1 SV=1	53.154	485	1.60746	0.684782	0.0004466	0.0070142	+
Q9BXB7	SPATA16	Spermatogenesis-associated protein 16 OS=Homo sapiens OX=9606 GN=SPATA16 PE=2 SV=3	65.263	569	1.47602	0.561712	0.01794	0.0373482	+
Q9BXR6	CFHR5	Complement factor H-related protein 5 OS=Homo sapiens OX=9606 GN=CFHR5 PE=1 SV=1	64.419	569	1.36164	0.445341	0.02526	0.0484944	+
P01700	IGLV1-47	Immunoglobulin lambda variable 1-47 OS=Homo sapiens OX=9606 GN=IGLV1-47 PE=1 SV=2	12.284	117	1.29963	0.378096	0.03135	0.0570893	+
P0C0L5	C4B	Complement C4-B OS=Homo sapiens OX=9606 GN=C4B PE=1 SV=2	192.751	1744	1.37003	0.454212	0.04769	0.0787417	+
P07237	P4HB	Protein disulfide-isomerase OS=Homo sapiens OX=9606 GN=P4HB PE=1 SV=3	57.116	508	0.827045	-0.273963	0.04263	0.0717464	-
P62258	YWHAE	14-3-3 protein epsilon OS=Homo sapiens OX=9606 GN=YWHAE PE=1 SV=1	29.174	255	0.697642	-0.519442	0.002036	0.0101675	-
P63104	YWHAZ	14-3-3 protein zeta/delta OS=Homo sapiens OX=9606 GN=YWHAZ PE=1 SV=1	27.745	245	0.489008	-1.03207	0.001472	0.00871216	-
P63241	EIF5A	Eukaryotic translation initiation factor 5A-1 OS=Homo sapiens OX=9606 GN=EIF5A PE=1 SV=2	16.832	154	0.617094	-0.696438	0.002482	0.0105226	-
P01023	A2M	Alpha-2-macroglobulin OS=Homo sapiens OX=9606 GN=A2M PE=1 SV=3	163.291	1474	1.40401	0.489558	0.003418	0.0125894	+
Q9BY76	ANGPTL4	Angiopoietin-related protein 4 OS=Homo sapiens OX=9606 GN=ANGPTL4 PE=1 SV=2	45.214	406	1.47643	0.562115	0.02255	0.0437936	+
Q07954	LRP1	Prolow-density lipoprotein receptor-related protein 1 OS=Homo sapiens OX=9606 GN=LRP1 PE=1 SV=2	504.606	4544	1.34967	0.432602	0.001581	0.00893704	+
Q9C091	GREB1L	GREB1-like protein OS=Homo sapiens OX=9606 GN=GREB1L PE=1 SV=2	214.354	1923	1.94002	0.956074	6.128e-05	0.0048901	+
P63261	ACTG1	Actin, cytoplasmic 2 OS=Homo sapiens OX=9606 GN=ACTG1 PE=1 SV=1	41.793	375	0.542913	-0.881208	0.01023	0.0249318	-
P67936	TPM4	Tropomyosin alpha-4 chain OS=Homo sapiens OX=9606 GN=TPM4 PE=1 SV=3	28.522	248	0.456209	-1.13223	0.002437	0.0105226	-
P68133	ACTA1	Actin, alpha skeletal muscle OS=Homo sapiens OX=9606 GN=ACTA1 PE=1 SV=1	42.051	377	0.464319	-1.10681	0.008624	0.022215	-
P41218	MNDA	Myeloid cell nuclear differentiation antigen OS=Homo sapiens OX=9606 GN=MNDA PE=1 SV=1	45.836	407	1.30531	0.384388	0.02948	0.054787	+
P07384	CAPN1	Calpain-1 catalytic subunit OS=Homo sapiens OX=9606 GN=CAPN1 PE=1 SV=1	81.89	714	0.667251	-0.583698	0.01164	0.0271489	-
Q9H2X3	CLEC4M	C-type lectin domain family 4 member M OS=Homo sapiens OX=9606 GN=CLEC4M PE=1 SV=1	45.35	399	1.76042	0.815922	0.0009271	0.00777999	+
P78344	EIF4G2	Eukaryotic translation initiation factor 4 gamma 2 OS=Homo sapiens OX=9606 GN=EIF4G2 PE=1 SV=1	102.362	907	0.66655	-0.585216	0.007169	0.0195824	-
Q08174	PCDH1	Protocadherin-1 OS=Homo sapiens OX=9606 GN=PCDH1 PE=1 SV=2	114.743	1060	1.43458	0.520624	0.01178	0.0273969	+
P48740	MASP1	Mannan-binding lectin serine protease 1 OS=Homo sapiens OX=9606 GN=MASP1 PE=1 SV=3	79.247	699	1.4263	0.512281	0.004424	0.0142902	+
P78356	PIP4K2B	Phosphatidylinositol 5-phosphate 4-kinase type-2 beta OS=Homo sapiens OX=9606 GN=PIP4K2B PE=1 SV=1	47.378	416	0.61605	-0.69888	0.003671	0.0130416	-
P78371	CCT2	T-complex protein 1 subunit beta OS=Homo sapiens OX=9606 GN=CCT2 PE=1 SV=4	57.488	535	0.693618	-0.527788	0.0003061	0.00636344	-
P84074	HPCA	Neuron-specific calcium-binding protein hippocalcin OS=Homo sapiens OX=9606 GN=HPCA PE=1 SV=2	22.427	193	0.618524	-0.693098	0.002393	0.0105226	-
O95428	PAPLN	Papilin OS=Homo sapiens OX=9606 GN=PAPLN PE=2 SV=4	137.7	1278	1.45792	0.543914	0.00105	0.00811858	+
P07900	HSP90AA1	Heat shock protein HSP 90-alpha OS=Homo sapiens OX=9606 GN=HSP90AA1 PE=1 SV=5	84.66	732	0.695647	-0.523573	0.001355	0.00835583	-
Q15293	RCN1	Reticulocalbin-1 OS=Homo sapiens OX=9606 GN=RCN1 PE=1 SV=1	38.89	331	1.26448	0.338546	0.01487	0.0320216	+
Q9H3K6	BOLA2	BolA-like protein 2 OS=Homo sapiens OX=9606 GN=BOLA2 PE=1 SV=1	10.117	86	1.28893	0.366171	0.001477	0.00871216	+
Q9HAV0	GNB4	Guanine nucleotide-binding protein subunit beta-4 OS=Homo sapiens OX=9606 GN=GNB4 PE=1 SV=3	37.567	340	1.22926	0.297786	0.0007203	0.00729183	+
Q15582	TGFBI	Transforming growth factor-beta-induced protein ig-h3 OS=Homo sapiens OX=9606 GN=TGFBI PE=1 SV=1	74.681	683	1.61087	0.687841	0.03786	0.0655703	+
Q16610	ECM1	Extracellular matrix protein 1 OS=Homo sapiens OX=9606 GN=ECM1 PE=1 SV=2	60.674	540	1.46116	0.547111	0.002844	0.0113481	+
P13521	SCG2	Secretogranin-2 OS=Homo sapiens OX=9606 GN=SCG2 PE=1 SV=2	70.941	617	1.391	0.476118	0.009525	0.0237106	+
P98082	DAB2	Disabled homolog 2 OS=Homo sapiens OX=9606 GN=DAB2 PE=1 SV=3	82.448	770	0.681537	-0.553137	0.01447	0.031453	-
P01861	IGHG4	Immunoglobulin heavy constant gamma 4 OS=Homo sapiens OX=9606 GN=IGHG4 PE=1 SV=1	35.941	327	2.43518	1.28403	0.01299	0.0292905	+
P07996	THBS1	Thrombospondin-1 OS=Homo sapiens OX=9606 GN=THBS1 PE=1 SV=2	129.383	1170	0.48428	-1.04609	0.0001479	0.00536637	-
P08237	PFKM	ATP-dependent 6-phosphofructokinase, muscle type OS=Homo sapiens OX=9606 GN=PFKM PE=1 SV=2	85.183	780	0.802473	-0.317475	0.000123	0.00536637	-
B9A064	IGLL5	Immunoglobulin lambda-like polypeptide 5 OS=Homo sapiens OX=9606 GN=IGLL5 PE=2 SV=2	23.063	214	1.63378	0.708214	0.004676	0.014696	+
P04070	PROC	Vitamin K-dependent protein C OS=Homo sapiens OX=9606 GN=PROC PE=1 SV=1	52.071	461	1.56472	0.645905	0.001348	0.00835583	+
A0A0C4DH35	IGHV3-35	Probable non-functional immunoglobulin heavy variable 3-35 OS=Homo sapiens OX=9606 GN=IGHV3-35 PE=1 SV=1	12.81	117	1.59659	0.674996	0.003994	0.0135891	+
O75486	SUPT3H	Transcription initiation protein SPT3 homolog OS=Homo sapiens OX=9606 GN=SUPT3H PE=1 SV=3	35.793	317	2.07528	1.05331	0.0003581	0.00670555	+
O75636	FCN3	Ficolin-3 OS=Homo sapiens OX=9606 GN=FCN3 PE=1 SV=2	32.903	299	1.38897	0.47402	0.01013	0.0248356	+
P03952	KLKB1	Plasma kallikrein OS=Homo sapiens OX=9606 GN=KLKB1 PE=1 SV=1	71.37	638	1.73136	0.791908	0.007122	0.0195196	+
P49327	FASN	Fatty acid synthase OS=Homo sapiens OX=9606 GN=FASN PE=1 SV=3	273.427	2511	1.29639	0.374496	0.005375	0.0161448	+
O00187	MASP2	Mannan-binding lectin serine protease 2 OS=Homo sapiens OX=9606 GN=MASP2 PE=1 SV=4	75.702	686	1.59044	0.669424	0.001576	0.00893704	+
P05154	SERPINA5	Plasma serine protease inhibitor OS=Homo sapiens OX=9606 GN=SERPINA5 PE=1 SV=3	45.675	406	1.43833	0.524398	0.01347	0.0299579	+
P05156	CFI	Complement factor I OS=Homo sapiens OX=9606 GN=CFI PE=1 SV=2	65.75	583	1.4638	0.549716	0.002429	0.0105226	+
Q9HCL0	PCDH18	Protocadherin-18 OS=Homo sapiens OX=9606 GN=PCDH18 PE=1 SV=3	126.149	1135	1.32656	0.407694	0.02116	0.0422163	+
O00178	GTPBP1	GTP-binding protein 1 OS=Homo sapiens OX=9606 GN=GTPBP1 PE=1 SV=3	72.454	669	1.62015	0.696128	0.0007463	0.00729287	+
O75882	ATRN	Attractin OS=Homo sapiens OX=9606 GN=ATRN PE=1 SV=2	158.537	1429	1.33531	0.417177	0.01705	0.0358623	+
Q16706	MAN2A1	Alpha-mannosidase 2 OS=Homo sapiens OX=9606 GN=MAN2A1 PE=1 SV=2	131.141	1144	1.56128	0.642734	0.006886	0.0191959	+
P00746	CFD	Complement factor D OS=Homo sapiens OX=9606 GN=CFD PE=1 SV=5	27.033	253	1.81177	0.8574	0.0002912	0.00626137	+
Q08380	LGALS3BP	Galectin-3-binding protein OS=Homo sapiens OX=9606 GN=LGALS3BP PE=1 SV=1	65.331	585	1.80675	0.853398	0.0005067	0.0070142	+
P08567	PLEK	Pleckstrin OS=Homo sapiens OX=9606 GN=PLEK PE=1 SV=3	40.125	350	0.540318	-0.888118	0.003288	0.0122772	-
Q9HDC9	APMAP	Adipocyte plasma membrane-associated protein OS=Homo sapiens OX=9606 GN=APMAP PE=1 SV=2	46.48	416	1.42319	0.509129	0.02699	0.0512118	+
P09486	SPARC	SPARC OS=Homo sapiens OX=9606 GN=SPARC PE=1 SV=1	34.632	303	0.709181	-0.495774	0.001226	0.00835583	-
Q9NPG4	PCDH12	Protocadherin-12 OS=Homo sapiens OX=9606 GN=PCDH12 PE=1 SV=1	128.995	1184	1.48482	0.570293	0.0004822	0.0070142	+
Q00013	MPP1	55 kDa erythrocyte membrane protein OS=Homo sapiens OX=9606 GN=MPP1 PE=1 SV=2	52.296	466	0.616994	-0.696672	3.748e-05	0.0048901	-
P09493	TPM1	Tropomyosin alpha-1 chain OS=Homo sapiens OX=9606 GN=TPM1 PE=1 SV=2	32.709	284	0.361638	-1.46738	0.006165	0.0176902	-
Q9NY15	STAB1	Stabilin-1 OS=Homo sapiens OX=9606 GN=STAB1 PE=1 SV=3	275.482	2570	1.39046	0.475559	0.002316	0.0104336	+
P19823	ITIH2	Inter-alpha-trypsin inhibitor heavy chain H2 OS=Homo sapiens OX=9606 GN=ITIH2 PE=1 SV=2	106.463	946	1.28738	0.364437	0.01939	0.0395575	+
P0DOY3	IGLC3	Immunoglobulin lambda constant 3 OS=Homo sapiens OX=9606 GN=IGLC3 PE=1 SV=1	11.266	106	1.46646	0.552333	0.04243	0.0716556	+
Q00577	PURA	Transcriptional activator protein Pur-alpha OS=Homo sapiens OX=9606 GN=PURA PE=1 SV=2	34.911	322	0.700675	-0.513182	0.002604	0.0107163	-
P0DP25	CALM3	Calmodulin-3 OS=Homo sapiens OX=9606 GN=CALM3 PE=1 SV=1	16.838	149	0.50535	-0.984646	0.0004065	0.00672527	-
Q08830	FGL1	Fibrinogen-like protein 1 OS=Homo sapiens OX=9606 GN=FGL1 PE=1 SV=3	36.38	312	1.46439	0.550304	0.02822	0.0528445	+
P49746	THBS3	Thrombospondin-3 OS=Homo sapiens OX=9606 GN=THBS3 PE=1 SV=1	104.201	956	1.62194	0.697717	0.008723	0.0223287	+
P03973	SLPI	Antileukoproteinase OS=Homo sapiens OX=9606 GN=SLPI PE=1 SV=2	14.326	132	1.72283	0.784782	0.001185	0.0083435	+
P00450	CP	Ceruloplasmin OS=Homo sapiens OX=9606 GN=CP PE=1 SV=1	122.205	1065	1.61412	0.690749	0.009275	0.023302	+
P07225	PROS1	Vitamin K-dependent protein S OS=Homo sapiens OX=9606 GN=PROS1 PE=1 SV=1	75.123	676	1.51051	0.595038	0.002633	0.0107163	+
A0A0B4J1X8	IGHV3-43	Immunoglobulin heavy variable 3-43 OS=Homo sapiens OX=9606 GN=IGHV3-43 PE=3 SV=1	13.077	118	1.82806	0.870313	0.01666	0.035224	+
A0A0C4DH68	IGKV2-24	Immunoglobulin kappa variable 2-24 OS=Homo sapiens OX=9606 GN=IGKV2-24 PE=3 SV=1	13.079	120	1.58724	0.666523	0.01641	0.0348766	+
P00748	F12	Coagulation factor XII OS=Homo sapiens OX=9606 GN=F12 PE=1 SV=3	67.792	615	1.34595	0.428623	0.008862	0.0226134	+
P19827	ITIH1	Inter-alpha-trypsin inhibitor heavy chain H1 OS=Homo sapiens OX=9606 GN=ITIH1 PE=1 SV=3	101.389	911	1.35842	0.44193	0.01092	0.0259151	+
P20618	PSMB1	Proteasome subunit beta type-1 OS=Homo sapiens OX=9606 GN=PSMB1 PE=1 SV=2	26.489	241	1.29152	0.369071	0.01966	0.0400081	+
A0A0A0MT36	IGKV6D-21	Immunoglobulin kappa variable 6D-21 OS=Homo sapiens OX=9606 GN=IGKV6D-21 PE=3 SV=1	12.34	114	2.25454	1.17284	0.01031	0.0249755	+
A0A0C4DH38	IGHV5-51	Immunoglobulin heavy variable 5-51 OS=Homo sapiens OX=9606 GN=IGHV5-51 PE=3 SV=1	12.675	117	1.9796	0.985213	0.002597	0.0107163	+
A0A0A0MS15	IGHV3-49	Immunoglobulin heavy variable 3-49 OS=Homo sapiens OX=9606 GN=IGHV3-49 PE=3 SV=1	13.056	119	1.43527	0.52132	0.01859	0.0383301	+
P02766	TTR	Transthyretin OS=Homo sapiens OX=9606 GN=TTR PE=1 SV=1	15.887	147	1.31532	0.395416	0.03304	0.0587217	+
P0DP09	IGKV1-13	Immunoglobulin kappa variable 1-13 OS=Homo sapiens OX=9606 GN=IGKV1-13 PE=3 SV=1	12.569	117	2.36956	1.24462	3.706e-05	0.0048901	+
P13671	C6	Complement component C6 OS=Homo sapiens OX=9606 GN=C6 PE=1 SV=3	104.786	934	1.55853	0.640182	0.001647	0.00918259	+
P04114	APOB	Apolipoprotein B-100 OS=Homo sapiens OX=9606 GN=APOB PE=1 SV=2	515.605	4563	2.34785	1.23134	0.0003572	0.00670555	+
P01031	C5	Complement C5 OS=Homo sapiens OX=9606 GN=C5 PE=1 SV=4	188.305	1676	1.53096	0.614436	0.003657	0.0130416	+
A2NJV5	IGKV2-29	Immunoglobulin kappa variable 2-29 OS=Homo sapiens OX=9606 GN=IGKV2-29 PE=3 SV=2	13.085	120	1.70257	0.767714	0.003811	0.0133714	+
Q9NZP8	C1RL	Complement C1r subcomponent-like protein OS=Homo sapiens OX=9606 GN=C1RL PE=1 SV=2	53.498	487	1.52084	0.604867	0.003283	0.0122772	+
O95445	APOM	Apolipoprotein M OS=Homo sapiens OX=9606 GN=APOM PE=1 SV=2	21.253	188	1.42298	0.508911	0.02188	0.0431243	+
P02745	C1QA	Complement C1q subcomponent subunit A OS=Homo sapiens OX=9606 GN=C1QA PE=1 SV=2	26.017	245	1.24342	0.314313	0.02824	0.0528445	+
P00734	F2	Prothrombin OS=Homo sapiens OX=9606 GN=F2 PE=1 SV=2	70.037	622	1.39392	0.47915	0.008424	0.021978	+
P13929	ENO3	Beta-enolase OS=Homo sapiens OX=9606 GN=ENO3 PE=1 SV=5	46.987	434	1.64257	0.715954	0.03804	0.0657422	+
Q12794	HYAL1	Hyaluronidase-1 OS=Homo sapiens OX=9606 GN=HYAL1 PE=1 SV=2	48.368	435	1.48953	0.574856	0.02164	0.0428588	+
Q9UBV8	PEF1	Peflin OS=Homo sapiens OX=9606 GN=PEF1 PE=1 SV=1	30.381	284	1.34228	0.424689	0.01319	0.0295776	+
P01860	IGHG3	Immunoglobulin heavy constant gamma 3 OS=Homo sapiens OX=9606 GN=IGHG3 PE=1 SV=2	41.287	377	1.42074	0.506641	0.03617	0.0634534	+
P01011	SERPINA3	Alpha-1-antichymotrypsin OS=Homo sapiens OX=9606 GN=SERPINA3 PE=1 SV=2	47.651	423	1.41813	0.503989	0.01436	0.0313379	+
Q16851	UGP2	UTP--glucose-1-phosphate uridylyltransferase OS=Homo sapiens OX=9606 GN=UGP2 PE=1 SV=5	56.94	508	1.434	0.520044	0.01299	0.0292905	+
A6NH11	GLTPD2	Glycolipid transfer protein domain-containing protein 2 OS=Homo sapiens OX=9606 GN=GLTPD2 PE=1 SV=2	31.642	291	1.57093	0.651615	0.003701	0.0130416	+
A0A0C4DH31	IGHV1-18	Immunoglobulin heavy variable 1-18 OS=Homo sapiens OX=9606 GN=IGHV1-18 PE=3 SV=1	12.82	117	1.55113	0.633318	0.007269	0.0196169	+
P02679	FGG	Fibrinogen gamma chain OS=Homo sapiens OX=9606 GN=FGG PE=1 SV=3	51.512	453	1.81843	0.862691	0.0002343	0.00615226	+
A0A075B6I0	IGLV8-61	Immunoglobulin lambda variable 8-61 OS=Homo sapiens OX=9606 GN=IGLV8-61 PE=3 SV=7	12.814	122	1.9923	0.994433	0.048	0.0790931	+
P01833	PIGR	Polymeric immunoglobulin receptor OS=Homo sapiens OX=9606 GN=PIGR PE=1 SV=4	83.284	764	2.13502	1.09425	0.002363	0.0105108	+
Q9UBX1	CTSF	Cathepsin F OS=Homo sapiens OX=9606 GN=CTSF PE=1 SV=1	53.366	484	1.45843	0.544417	0.003108	0.011822	+
P02741	CRP	C-reactive protein OS=Homo sapiens OX=9606 GN=CRP PE=1 SV=1	25.039	224	3.31236	1.72786	0.004081	0.0136145	+
P08603	CFH	Complement factor H OS=Homo sapiens OX=9606 GN=CFH PE=1 SV=4	139.096	1231	1.43717	0.523226	0.01355	0.0300163	+
P10124	SRGN	Serglycin OS=Homo sapiens OX=9606 GN=SRGN PE=1 SV=3	17.652	158	0.576499	-0.794609	6.196e-05	0.0048901	-
Q9UBX5	FBLN5	Fibulin-5 OS=Homo sapiens OX=9606 GN=FBLN5 PE=1 SV=1	50.18	448	1.43148	0.517503	0.005043	0.0154323	+
O60462	NRP2	Neuropilin-2 OS=Homo sapiens OX=9606 GN=NRP2 PE=1 SV=3	104.831	931	1.36423	0.448084	0.02398	0.0462553	+
P14543	NID1	Nidogen-1 OS=Homo sapiens OX=9606 GN=NID1 PE=1 SV=3	136.377	1247	1.27269	0.347878	0.01191	0.0275419	+
P23284	PPIB	Peptidyl-prolyl cis-trans isomerase B OS=Homo sapiens OX=9606 GN=PPIB PE=1 SV=2	23.743	216	1.34531	0.427933	0.0006427	0.00702319	+
P00736	C1R	Complement C1r subcomponent OS=Homo sapiens OX=9606 GN=C1R PE=1 SV=2	80.119	705	1.55209	0.634208	0.0006812	0.00720126	+
Q17RC7	EXOC3L4	Exocyst complex component 3-like protein 4 OS=Homo sapiens OX=9606 GN=EXOC3L4 PE=1 SV=2	79.896	722	1.32202	0.402748	0.002092	0.0101845	+
P11216	PYGB	Glycogen phosphorylase, brain form OS=Homo sapiens OX=9606 GN=PYGB PE=1 SV=5	96.696	843	0.737328	-0.439622	0.0003991	0.00672527	-
P49908	SELENOP	Selenoprotein P OS=Homo sapiens OX=9606 GN=SELENOP PE=1 SV=3	43.174	381	1.3418	0.424167	0.00574	0.0169288	+
P20742	PZP	Pregnancy zone protein OS=Homo sapiens OX=9606 GN=PZP PE=1 SV=4	163.863	1482	2.86882	1.52046	0.001338	0.00835583	+
Q01082	SPTBN1	Spectrin beta chain, non-erythrocytic 1 OS=Homo sapiens OX=9606 GN=SPTBN1 PE=1 SV=2	274.609	2364	0.687178	-0.541245	0.03026	0.0558198	-
P10451	SPP1	Osteopontin OS=Homo sapiens OX=9606 GN=SPP1 PE=1 SV=1	35.423	314	1.30647	0.385677	0.003907	0.0135332	+
P49913	CAMP	Cathelicidin antimicrobial peptide OS=Homo sapiens OX=9606 GN=CAMP PE=1 SV=1	19.301	170	1.49969	0.584667	0.03185	0.0573582	+
Q01433	AMPD2	AMP deaminase 2 OS=Homo sapiens OX=9606 GN=AMPD2 PE=1 SV=2	100.688	879	0.829987	-0.26884	0.04233	0.0716354	-
P00451	F8	Coagulation factor VIII OS=Homo sapiens OX=9606 GN=F8 PE=1 SV=1	267.009	2351	1.59431	0.672928	0.0009795	0.00801231	+
P02746	C1QB	Complement C1q subcomponent subunit B OS=Homo sapiens OX=9606 GN=C1QB PE=1 SV=3	26.722	253	1.32169	0.402381	0.002517	0.0106114	+
Q9UDY2	TJP2	Tight junction protein ZO-2 OS=Homo sapiens OX=9606 GN=TJP2 PE=1 SV=2	133.958	1190	1.34234	0.424749	0.0003846	0.00672527	+
P08697	SERPINF2	Alpha-2-antiplasmin OS=Homo sapiens OX=9606 GN=SERPINF2 PE=1 SV=3	54.566	491	1.46494	0.550844	0.001892	0.00973728	+
P01714	IGLV3-19	Immunoglobulin lambda variable 3-19 OS=Homo sapiens OX=9606 GN=IGLV3-19 PE=1 SV=2	12.042	112	2.07504	1.05314	0.03002	0.055537	+
P15907	ST6GAL1	Beta-galactoside alpha-2,6-sialyltransferase 1 OS=Homo sapiens OX=9606 GN=ST6GAL1 PE=1 SV=1	46.605	406	1.31643	0.396629	0.01357	0.0300163	+
P24158	PRTN3	Myeloblastin OS=Homo sapiens OX=9606 GN=PRTN3 PE=1 SV=3	27.807	256	1.46668	0.552555	0.01723	0.0361475	+
Q9UEW3	MARCO	Macrophage receptor MARCO OS=Homo sapiens OX=9606 GN=MARCO PE=1 SV=1	52.658	520	1.90735	0.931566	0.0005067	0.0070142	+
P11277	SPTB	Spectrin beta chain, erythrocytic OS=Homo sapiens OX=9606 GN=SPTB PE=1 SV=5	246.468	2137	0.714506	-0.484982	0.01064	0.0254974	-
P10643	C7	Complement component C7 OS=Homo sapiens OX=9606 GN=C7 PE=1 SV=2	93.518	843	1.38342	0.46824	0.00132	0.00835583	+
O14791	APOL1	Apolipoprotein L1 OS=Homo sapiens OX=9606 GN=APOL1 PE=1 SV=5	43.974	398	1.60104	0.679013	0.006874	0.0191959	+
P11586	MTHFD1	C-1-tetrahydrofolate synthase, cytoplasmic OS=Homo sapiens OX=9606 GN=MTHFD1 PE=1 SV=3	101.559	935	0.755066	-0.405326	0.01767	0.0368805	-
Q01518	CAP1	Adenylyl cyclase-associated protein 1 OS=Homo sapiens OX=9606 GN=CAP1 PE=1 SV=5	51.901	475	0.521845	-0.938306	0.002673	0.0107304	-
P24592	IGFBP6	Insulin-like growth factor-binding protein 6 OS=Homo sapiens OX=9606 GN=IGFBP6 PE=1 SV=1	25.322	240	1.45551	0.541521	0.001939	0.00986466	+
P10646	TFPI	Tissue factor pathway inhibitor OS=Homo sapiens OX=9606 GN=TFPI PE=1 SV=1	35.015	304	1.44153	0.527599	0.002306	0.0104336	+
P51587	BRCA2	Breast cancer type 2 susceptibility protein OS=Homo sapiens OX=9606 GN=BRCA2 PE=1 SV=3	384.202	3418	2.38438	1.25361	0.0003127	0.00636344	+
A0A0C4DH67	IGKV1-8	Immunoglobulin kappa variable 1-8 OS=Homo sapiens OX=9606 GN=IGKV1-8 PE=3 SV=1	12.537	115	1.66765	0.73782	0.0005618	0.00702319	+
P02748	C9	Complement component C9 OS=Homo sapiens OX=9606 GN=C9 PE=1 SV=2	63.173	559	2.02675	1.01917	0.002036	0.0101675	+
Q12805	EFEMP1	EGF-containing fibulin-like extracellular matrix protein 1 OS=Homo sapiens OX=9606 GN=EFEMP1 PE=1 SV=2	54.641	493	1.39483	0.480089	0.008916	0.0226801	+
Q9UGM5	FETUB	Fetuin-B OS=Homo sapiens OX=9606 GN=FETUB PE=1 SV=2	42.055	382	1.61709	0.693401	0.02009	0.0406798	+
Q01813	PFKP	ATP-dependent 6-phosphofructokinase, platelet type OS=Homo sapiens OX=9606 GN=PFKP PE=1 SV=2	85.596	784	0.781327	-0.356001	0.006569	0.0185023	-
Q53RD9	FBLN7	Fibulin-7 OS=Homo sapiens OX=9606 GN=FBLN7 PE=2 SV=1	47.376	439	1.64648	0.719387	0.000272	0.00619318	+
Q04917	YWHAH	14-3-3 protein eta OS=Homo sapiens OX=9606 GN=YWHAH PE=1 SV=4	28.219	246	0.433469	-1.206	0.006121	0.0176902	-
Q12864	CDH17	Cadherin-17 OS=Homo sapiens OX=9606 GN=CDH17 PE=1 SV=3	92.219	832	1.43752	0.52358	0.03606	0.0633971	+
P07307	ASGR2	Asialoglycoprotein receptor 2 OS=Homo sapiens OX=9606 GN=ASGR2 PE=1 SV=2	35.092	311	1.86046	0.895657	0.0001756	0.00536637	+
Q5SZK8	FREM2	FRAS1-related extracellular matrix protein 2 OS=Homo sapiens OX=9606 GN=FREM2 PE=1 SV=2	351.157	3169	1.48701	0.572416	0.007054	0.0193985	+
O94985	CLSTN1	Calsyntenin-1 OS=Homo sapiens OX=9606 GN=CLSTN1 PE=1 SV=1	109.793	981	1.29924	0.377673	0.01062	0.0254974	+
A0A0C4DH29	IGHV1-3	Immunoglobulin heavy variable 1-3 OS=Homo sapiens OX=9606 GN=IGHV1-3 PE=3 SV=1	13.008	117	1.699	0.764686	0.003039	0.0117224	+
O94769	ECM2	Extracellular matrix protein 2 OS=Homo sapiens OX=9606 GN=ECM2 PE=2 SV=1	79.789	699	1.32592	0.406989	0.0186	0.0383301	+
Q05397	PTK2	Focal adhesion kinase 1 OS=Homo sapiens OX=9606 GN=PTK2 PE=1 SV=2	119.233	1052	0.532237	-0.90986	0.0003355	0.0066609	-
Q9UHG3	PCYOX1	Prenylcysteine oxidase 1 OS=Homo sapiens OX=9606 GN=PCYOX1 PE=1 SV=3	56.64	505	1.32189	0.402598	0.002128	0.0101845	+
P13501	CCL5	C-C motif chemokine 5 OS=Homo sapiens OX=9606 GN=CCL5 PE=1 SV=3	9.99	91	0.4966	-1.00984	0.002996	0.0117224	-
Q05682	CALD1	Caldesmon OS=Homo sapiens OX=9606 GN=CALD1 PE=1 SV=3	93.231	793	0.592606	-0.754854	0.001872	0.00973728	-
P03950	ANG	Angiogenin OS=Homo sapiens OX=9606 GN=ANG PE=1 SV=1	16.55	147	1.69995	0.765489	0.0007659	0.00729287	+
Q9UJJ9	GNPTG	N-acetylglucosamine-1-phosphotransferase subunit gamma OS=Homo sapiens OX=9606 GN=GNPTG PE=1 SV=1	33.974	305	1.53948	0.622441	0.00232	0.0104336	+
O00391	QSOX1	Sulfhydryl oxidase 1 OS=Homo sapiens OX=9606 GN=QSOX1 PE=1 SV=3	82.578	747	1.41159	0.497322	0.0007055	0.00729183	+
Q12907	LMAN2	Vesicular integral-membrane protein VIP36 OS=Homo sapiens OX=9606 GN=LMAN2 PE=1 SV=1	40.229	356	1.45046	0.536515	0.002628	0.0107163	+
P13667	PDIA4	Protein disulfide-isomerase A4 OS=Homo sapiens OX=9606 GN=PDIA4 PE=1 SV=2	72.932	645	0.731719	-0.450638	0.004205	0.0139709	-
Q5T0N5	FNBP1L	Formin-binding protein 1-like OS=Homo sapiens OX=9606 GN=FNBP1L PE=1 SV=3	70.065	605	1.31033	0.389926	0.009377	0.0234137	+
P24593	IGFBP5	Insulin-like growth factor-binding protein 5 OS=Homo sapiens OX=9606 GN=IGFBP5 PE=1 SV=1	30.57	272	1.59889	0.677075	0.0002264	0.00614299	+
Q5VTE0	EEF1A1P5	Putative elongation factor 1-alpha-like 3 OS=Homo sapiens OX=9606 GN=EEF1A1P5 PE=5 SV=1	50.185	462	1.59248	0.671274	0.0007219	0.00729183	+
P10909	CLU	Clusterin OS=Homo sapiens OX=9606 GN=CLU PE=1 SV=1	52.495	449	1.47211	0.557887	0.000574	0.00702319	+
O14498	ISLR	Immunoglobulin superfamily containing leucine-rich repeat protein OS=Homo sapiens OX=9606 GN=ISLR PE=2 SV=1	45.997	428	1.35883	0.442361	0.0317	0.0573418	+
Q06323	PSME1	Proteasome activator complex subunit 1 OS=Homo sapiens OX=9606 GN=PSME1 PE=1 SV=1	28.723	249	0.794033	-0.33273	0.04139	0.0703541	-
P04180	LCAT	Phosphatidylcholine-sterol acyltransferase OS=Homo sapiens OX=9606 GN=LCAT PE=1 SV=1	49.578	440	1.46464	0.550542	0.001717	0.00919499	+
P54802	NAGLU	Alpha-N-acetylglucosaminidase OS=Homo sapiens OX=9606 GN=NAGLU PE=1 SV=2	82.266	743	1.46339	0.549314	0.04025	0.0689677	+
Q13093	PLA2G7	Platelet-activating factor acetylhydrolase OS=Homo sapiens OX=9606 GN=PLA2G7 PE=1 SV=1	50.077	441	1.808	0.854394	0.0008837	0.00749304	+
Q06830	PRDX1	Peroxiredoxin-1 OS=Homo sapiens OX=9606 GN=PRDX1 PE=1 SV=1	22.11	199	0.827341	-0.273446	0.01185	0.0274812	-
P11047	LAMC1	Laminin subunit gamma-1 OS=Homo sapiens OX=9606 GN=LAMC1 PE=1 SV=3	177.603	1609	1.38558	0.470489	0.003835	0.0133978	+
P04003	C4BPA	C4b-binding protein alpha chain OS=Homo sapiens OX=9606 GN=C4BPA PE=1 SV=2	67.033	597	1.65399	0.725947	0.001289	0.00835583	+
Q9UK55	SERPINA10	Protein Z-dependent protease inhibitor OS=Homo sapiens OX=9606 GN=SERPINA10 PE=1 SV=1	50.707	444	1.66727	0.737489	0.008664	0.0222476	+
P08709	F7	Coagulation factor VII OS=Homo sapiens OX=9606 GN=F7 PE=1 SV=1	51.594	466	1.31751	0.397809	0.02085	0.0417	+
P01042	KNG1	Kininogen-1 OS=Homo sapiens OX=9606 GN=KNG1 PE=1 SV=2	71.957	644	1.58133	0.661137	0.02135	0.0424912	+
P00747	PLG	Plasminogen OS=Homo sapiens OX=9606 GN=PLG PE=1 SV=2	90.569	810	1.45219	0.538234	0.01247	0.0285014	+
Q07960	ARHGAP1	Rho GTPase-activating protein 1 OS=Homo sapiens OX=9606 GN=ARHGAP1 PE=1 SV=1	50.436	439	0.641675	-0.640085	0.0007387	0.00729287	-
P26927	MST1	Hepatocyte growth factor-like protein OS=Homo sapiens OX=9606 GN=MST1 PE=1 SV=2	80.32	711	1.29291	0.370617	0.04101	0.0699835	+
P14618	PKM	Pyruvate kinase PKM OS=Homo sapiens OX=9606 GN=PKM PE=1 SV=4	57.937	531	0.611994	-0.708412	0.00386	0.0134275	-
Q9UKX5	ITGA11	Integrin alpha-11 OS=Homo sapiens OX=9606 GN=ITGA11 PE=1 SV=2	133.47	1188	1.59051	0.669486	0.003028	0.0117224	+
Q13103	SPP2	Secreted phosphoprotein 24 OS=Homo sapiens OX=9606 GN=SPP2 PE=1 SV=1	24.338	211	1.52884	0.612438	0.002178	0.0102479	+
Q08209	PPP3CA	Serine/threonine-protein phosphatase 2B catalytic subunit alpha isoform OS=Homo sapiens OX=9606 GN=PPP3CA PE=1 SV=1	58.688	521	0.579161	-0.787965	0.006464	0.0182698	-
Q9UKZ9	PCOLCE2	Procollagen C-endopeptidase enhancer 2 OS=Homo sapiens OX=9606 GN=PCOLCE2 PE=1 SV=1	45.717	415	1.43032	0.516341	0.005066	0.0154447	+
P14625	HSP90B1	Endoplasmin OS=Homo sapiens OX=9606 GN=HSP90B1 PE=1 SV=1	92.469	803	0.809864	-0.304249	0.02694	0.0512118	-
Q6P988	NOTUM	Palmitoleoyl-protein carboxylesterase NOTUM OS=Homo sapiens OX=9606 GN=NOTUM PE=1 SV=2	55.699	496	1.36613	0.450098	0.01517	0.0325815	+
Q13444	ADAM15	Disintegrin and metalloproteinase domain-containing protein 15 OS=Homo sapiens OX=9606 GN=ADAM15 PE=1 SV=4	92.959	863	1.48376	0.569254	0.007021	0.0193732	+
P55056	APOC4	Apolipoprotein C-IV OS=Homo sapiens OX=9606 GN=APOC4 PE=1 SV=1	14.553	127	1.74441	0.80274	0.001099	0.00811858	+
Q13790	APOF	Apolipoprotein F OS=Homo sapiens OX=9606 GN=APOF PE=1 SV=2	35.399	326	1.44221	0.528283	0.006091	0.0176902	+
O14773	TPP1	Tripeptidyl-peptidase 1 OS=Homo sapiens OX=9606 GN=TPP1 PE=1 SV=2	61.248	563	1.21154	0.276845	0.0374	0.0650504	+
P01859	IGHG2	Immunoglobulin heavy constant gamma 2 OS=Homo sapiens OX=9606 GN=IGHG2 PE=1 SV=2	35.901	326	1.66152	0.7325	0.02262	0.0437936	+
P14868	DARS1	Aspartate--tRNA ligase, cytoplasmic OS=Homo sapiens OX=9606 GN=DARS1 PE=1 SV=2	57.136	501	0.495225	-1.01384	9.924e-05	0.00536637	-
P15153	RAC2	Ras-related C3 botulinum toxin substrate 2 OS=Homo sapiens OX=9606 GN=RAC2 PE=1 SV=1	21.429	192	0.732967	-0.44818	0.000854	0.00735513	-
Q6Q788	APOA5	Apolipoprotein A-V OS=Homo sapiens OX=9606 GN=APOA5 PE=1 SV=1	41.213	366	1.89521	0.922361	0.01065	0.0254974	+
O76076	CCN5	CCN family member 5 OS=Homo sapiens OX=9606 GN=CCN5 PE=1 SV=1	26.825	250	1.3807	0.465395	0.002103	0.0101845	+
P00742	F10	Coagulation factor X OS=Homo sapiens OX=9606 GN=F10 PE=1 SV=2	54.732	488	1.44696	0.533025	0.003445	0.0126317	+
P16401	H1-5	Histone H1.5 OS=Homo sapiens OX=9606 GN=H1-5 PE=1 SV=3	22.58	226	0.445196	-1.16749	0.01135	0.0265486	-
Q9UPN9	TRIM33	E3 ubiquitin-protein ligase TRIM33 OS=Homo sapiens OX=9606 GN=TRIM33 PE=1 SV=3	122.533	1127	1.74627	0.804275	0.0002552	0.00619318	+
Q6UX71	PLXDC2	Plexin domain-containing protein 2 OS=Homo sapiens OX=9606 GN=PLXDC2 PE=1 SV=1	59.583	529	1.28254	0.359001	0.02735	0.0517674	+
P01344	IGF2	Insulin-like growth factor II OS=Homo sapiens OX=9606 GN=IGF2 PE=1 SV=1	20.14	180	1.58141	0.661208	0.01333	0.0298094	+
P01718	IGLV3-27	Immunoglobulin lambda variable 3-27 OS=Homo sapiens OX=9606 GN=IGLV3-27 PE=1 SV=2	12.165	113	1.87995	0.910692	0.02037	0.0410425	+
P05160	F13B	Coagulation factor XIII B chain OS=Homo sapiens OX=9606 GN=F13B PE=1 SV=3	75.511	661	1.44117	0.527237	0.003664	0.0130416	+
P04217	A1BG	Alpha-1B-glycoprotein OS=Homo sapiens OX=9606 GN=A1BG PE=1 SV=4	54.254	495	1.44901	0.535067	0.01392	0.0306125	+
P07357	C8A	Complement component C8 alpha chain OS=Homo sapiens OX=9606 GN=C8A PE=1 SV=2	65.163	584	1.84311	0.882142	0.004524	0.0143849	+
P16403	H1-2	Histone H1.2 OS=Homo sapiens OX=9606 GN=H1-2 PE=1 SV=2	21.365	213	0.321092	-1.63894	0.002033	0.0101675	-
Q08495	DMTN	Dematin OS=Homo sapiens OX=9606 GN=DMTN PE=1 SV=3	45.514	405	0.672397	-0.572615	0.00146	0.00871216	-
P07358	C8B	Complement component C8 beta chain OS=Homo sapiens OX=9606 GN=C8B PE=1 SV=3	67.047	591	1.69587	0.762027	0.002453	0.0105226	+
Q13094	LCP2	Lymphocyte cytosolic protein 2 OS=Homo sapiens OX=9606 GN=LCP2 PE=1 SV=1	60.188	533	0.797489	-0.326463	0.01116	0.0263311	-
P17858	PFKL	ATP-dependent 6-phosphofructokinase, liver type OS=Homo sapiens OX=9606 GN=PFKL PE=1 SV=6	85.018	780	0.788807	-0.342256	0.0008242	0.00735513	-
Q9Y251	HPSE	Heparanase OS=Homo sapiens OX=9606 GN=HPSE PE=1 SV=2	61.149	543	1.35825	0.441751	0.0006471	0.00702319	+
P27169	PON1	Serum paraoxonase/arylesterase 1 OS=Homo sapiens OX=9606 GN=PON1 PE=1 SV=3	39.731	355	1.50584	0.590571	0.00515	0.0156422	+
P17987	TCP1	T-complex protein 1 subunit alpha OS=Homo sapiens OX=9606 GN=TCP1 PE=1 SV=1	60.344	556	0.71767	-0.478608	0.0007705	0.00729287	-
Q13098	GPS1	COP9 signalosome complex subunit 1 OS=Homo sapiens OX=9606 GN=GPS1 PE=1 SV=4	55.537	491	0.523694	-0.933203	0.0009973	0.00801231	-
Q13162	PRDX4	Peroxiredoxin-4 OS=Homo sapiens OX=9606 GN=PRDX4 PE=1 SV=1	30.54	271	0.515606	-0.955659	0.0008584	0.00735513	-
Q13201	MMRN1	Multimerin-1 OS=Homo sapiens OX=9606 GN=MMRN1 PE=1 SV=3	138.11	1228	0.639627	-0.644698	0.0007569	0.00729287	-
P18054	ALOX12	Polyunsaturated fatty acid lipoxygenase ALOX12 OS=Homo sapiens OX=9606 GN=ALOX12 PE=1 SV=4	75.694	663	0.617364	-0.695807	0.001596	0.00895961	-
P27918	CFP	Properdin OS=Homo sapiens OX=9606 GN=CFP PE=1 SV=2	51.276	469	1.34794	0.430759	0.03673	0.0641439	+
P02675	FGB	Fibrinogen beta chain OS=Homo sapiens OX=9606 GN=FGB PE=1 SV=2	55.928	491	1.84953	0.887157	0.0001709	0.00536637	+
P11150	LIPC	Hepatic triacylglycerol lipase OS=Homo sapiens OX=9606 GN=LIPC PE=1 SV=3	55.914	499	1.33624	0.418183	0.03099	0.0568337	+
P11597	CETP	Cholesteryl ester transfer protein OS=Homo sapiens OX=9606 GN=CETP PE=1 SV=2	54.756	493	1.97872	0.984565	0.003021	0.0117224	+
Q13418	ILK	Integrin-linked protein kinase OS=Homo sapiens OX=9606 GN=ILK PE=1 SV=2	51.419	452	0.573815	-0.801342	0.002264	0.0104037	-
P05164	MPO	Myeloperoxidase OS=Homo sapiens OX=9606 GN=MPO PE=1 SV=1	83.869	745	1.566	0.647089	0.003954	0.0135804	+
Q9Y2Y8	PRG3	Proteoglycan 3 OS=Homo sapiens OX=9606 GN=PRG3 PE=1 SV=2	25.406	225	1.83408	0.875057	0.002676	0.0107304	+
P18206	VCL	Vinculin OS=Homo sapiens OX=9606 GN=VCL PE=1 SV=4	123.799	1134	0.534581	-0.903521	0.00248	0.0105226	-
P19105	MYL12A	Myosin regulatory light chain 12A OS=Homo sapiens OX=9606 GN=MYL12A PE=1 SV=2	19.794	171	0.493214	-1.01971	0.0001399	0.00536637	-
Q13576	IQGAP2	Ras GTPase-activating-like protein IQGAP2 OS=Homo sapiens OX=9606 GN=IQGAP2 PE=1 SV=4	180.578	1575	0.690267	-0.534775	0.0081	0.0213379	-
Q9Y4L1	HYOU1	Hypoxia up-regulated protein 1 OS=Homo sapiens OX=9606 GN=HYOU1 PE=1 SV=1	111.335	999	1.28999	0.367362	0.01396	0.0306125	+
Q9Y5C1	ANGPTL3	Angiopoietin-related protein 3 OS=Homo sapiens OX=9606 GN=ANGPTL3 PE=1 SV=1	53.637	460	1.71031	0.774258	0.0007895	0.00730288	+
P02647	APOA1	Apolipoprotein A-I OS=Homo sapiens OX=9606 GN=APOA1 PE=1 SV=1	30.778	267	1.41823	0.504094	0.005491	0.0164326	+
Q13642	FHL1	Four and a half LIM domains protein 1 OS=Homo sapiens OX=9606 GN=FHL1 PE=1 SV=4	36.263	323	0.494496	-1.01597	0.001698	0.00919499	-
Q6UXH0	ANGPTL8	Angiopoietin-like protein 8 OS=Homo sapiens OX=9606 GN=ANGPTL8 PE=1 SV=1	22.105	198	1.23414	0.303507	0.04657	0.0770487	+
P55058	PLTP	Phospholipid transfer protein OS=Homo sapiens OX=9606 GN=PLTP PE=1 SV=1	54.739	493	1.55266	0.634742	0.001446	0.00871216	+
P28070	PSMB4	Proteasome subunit beta type-4 OS=Homo sapiens OX=9606 GN=PSMB4 PE=1 SV=4	29.204	264	1.42312	0.509057	0.004549	0.0143996	+
P01594	IGKV1-33	Immunoglobulin kappa variable 1-33 OS=Homo sapiens OX=9606 GN=IGKV1-33 PE=1 SV=2	12.848	117	1.42162	0.507536	0.03129	0.0570893	+
Q14112	NID2	Nidogen-2 OS=Homo sapiens OX=9606 GN=NID2 PE=1 SV=3	151.254	1375	1.30431	0.383292	0.001321	0.00835583	+
Q6V0I7	FAT4	Protocadherin Fat 4 OS=Homo sapiens OX=9606 GN=FAT4 PE=1 SV=2	542.687	4981	1.51682	0.601048	0.007388	0.0198476	+
Q14247	CTTN	Src substrate cortactin OS=Homo sapiens OX=9606 GN=CTTN PE=1 SV=2	61.586	550	0.560649	-0.83483	0.0002923	0.00626137	-
P02743	APCS	Serum amyloid P-component OS=Homo sapiens OX=9606 GN=APCS PE=1 SV=2	25.387	223	1.81222	0.85776	0.02539	0.0486293	+
P29622	SERPINA4	Kallistatin OS=Homo sapiens OX=9606 GN=SERPINA4 PE=1 SV=3	48.542	427	1.35747	0.440925	0.003083	0.011782	+
P55103	INHBC	Inhibin beta C chain OS=Homo sapiens OX=9606 GN=INHBC PE=2 SV=1	38.238	352	1.41035	0.496052	0.01128	0.0265373	+
O00151	PDLIM1	PDZ and LIM domain protein 1 OS=Homo sapiens OX=9606 GN=PDLIM1 PE=1 SV=4	36.072	329	0.640817	-0.642015	0.002082	0.0101845	-
Q14766	LTBP1	Latent-transforming growth factor beta-binding protein 1 OS=Homo sapiens OX=9606 GN=LTBP1 PE=1 SV=4	186.796	1721	0.638878	-0.646389	0.0001574	0.00536637	-
P30046	DDT	D-dopachrome decarboxylase OS=Homo sapiens OX=9606 GN=DDT PE=1 SV=3	12.712	118	1.43872	0.524783	0.0006464	0.00702319	+
Q76LX8	ADAMTS13	A disintegrin and metalloproteinase with thrombospondin motifs 13 OS=Homo sapiens OX=9606 GN=ADAMTS13 PE=1 SV=1	153.604	1427	1.36343	0.447237	0.01878	0.0385061	+
Q14847	LASP1	LIM and SH3 domain protein 1 OS=Homo sapiens OX=9606 GN=LASP1 PE=1 SV=2	29.717	261	0.665882	-0.586661	0.0001671	0.00536637	-
Q15084	PDIA6	Protein disulfide-isomerase A6 OS=Homo sapiens OX=9606 GN=PDIA6 PE=1 SV=1	48.121	440	0.708682	-0.49679	0.01342	0.0299284	-
P07360	C8G	Complement component C8 gamma chain OS=Homo sapiens OX=9606 GN=C8G PE=1 SV=3	22.277	202	1.56481	0.645986	0.0009949	0.00801231	+
P30101	PDIA3	Protein disulfide-isomerase A3 OS=Homo sapiens OX=9606 GN=PDIA3 PE=1 SV=4	56.782	505	1.40315	0.488668	0.001258	0.00835583	+
Q15208	STK38	Serine/threonine-protein kinase 38 OS=Homo sapiens OX=9606 GN=STK38 PE=1 SV=1	54.19	465	0.684983	-0.54586	0.03342	0.0592677	-
Q14126	DSG2	Desmoglein-2 OS=Homo sapiens OX=9606 GN=DSG2 PE=1 SV=2	122.294	1118	1.48611	0.571538	0.002351	0.0105108	+
P00738	HP	Haptoglobin OS=Homo sapiens OX=9606 GN=HP PE=1 SV=1	45.205	406	1.6592	0.73049	0.01472	0.0317827	+
Q86U17	SERPINA11	Serpin A11 OS=Homo sapiens OX=9606 GN=SERPINA11 PE=2 SV=2	46.989	422	1.56682	0.647838	0.0007256	0.00729183	+
P20042	EIF2S2	Eukaryotic translation initiation factor 2 subunit 2 OS=Homo sapiens OX=9606 GN=EIF2S2 PE=1 SV=2	38.388	333	0.770314	-0.376482	0.008259	0.0216168	-
Q15366	PCBP2	Poly(rC)-binding protein 2 OS=Homo sapiens OX=9606 GN=PCBP2 PE=1 SV=1	38.58	365	0.635625	-0.653751	0.001898	0.00973728	-
P07437	TUBB	Tubulin beta chain OS=Homo sapiens OX=9606 GN=TUBB PE=1 SV=2	49.671	444	1.46064	0.546604	0.04453	0.07443	+
P20073	ANXA7	Annexin A7 OS=Homo sapiens OX=9606 GN=ANXA7 PE=1 SV=3	52.739	488	0.555434	-0.848312	6.776e-05	0.0048901	-
P21291	CSRP1	Cysteine and glycine-rich protein 1 OS=Homo sapiens OX=9606 GN=CSRP1 PE=1 SV=3	20.567	193	0.53437	-0.904088	0.002616	0.0107163	-
P30613	PKLR	Pyruvate kinase PKLR OS=Homo sapiens OX=9606 GN=PKLR PE=1 SV=2	61.83	574	1.86817	0.901628	0.004013	0.0135891	+
P20851	C4BPB	C4b-binding protein beta chain OS=Homo sapiens OX=9606 GN=C4BPB PE=1 SV=1	28.357	252	1.55621	0.638035	0.00135	0.00835583	+
O00233	PSMD9	26S proteasome non-ATPase regulatory subunit 9 OS=Homo sapiens OX=9606 GN=PSMD9 PE=1 SV=3	24.682	223	0.644695	-0.633311	0.000645	0.00702319	-
P55285	CDH6	Cadherin-6 OS=Homo sapiens OX=9606 GN=CDH6 PE=1 SV=1	88.309	790	1.40926	0.494935	0.03437	0.0607763	+
P23528	CFL1	Cofilin-1 OS=Homo sapiens OX=9606 GN=CFL1 PE=1 SV=3	18.502	166	0.431857	-1.21137	0.001137	0.00811858	-
Q15370	ELOB	Elongin-B OS=Homo sapiens OX=9606 GN=ELOB PE=1 SV=1	13.133	118	0.590807	-0.75924	0.001703	0.00919499	-
P55287	CDH11	Cadherin-11 OS=Homo sapiens OX=9606 GN=CDH11 PE=2 SV=2	87.965	796	1.47119	0.556984	0.001902	0.00973728	+
Q15404	RSU1	Ras suppressor protein 1 OS=Homo sapiens OX=9606 GN=RSU1 PE=1 SV=3	31.54	277	0.358318	-1.48069	0.0037	0.0130416	-
Q86UD1	OAF	Out at first protein homolog OS=Homo sapiens OX=9606 GN=OAF PE=2 SV=1	30.688	273	1.58944	0.668521	0.009355	0.0234137	+
P24534	EEF1B2	Elongation factor 1-beta OS=Homo sapiens OX=9606 GN=EEF1B2 PE=1 SV=3	24.764	225	0.498179	-1.00526	0.006925	0.0192387	-
Q86X29	LSR	Lipolysis-stimulated lipoprotein receptor OS=Homo sapiens OX=9606 GN=LSR PE=1 SV=4	71.439	649	1.52957	0.613127	0.001813	0.009583	+
P24844	MYL9	Myosin regulatory light polypeptide 9 OS=Homo sapiens OX=9606 GN=MYL9 PE=1 SV=4	19.827	172	0.633553	-0.658463	0.01234	0.0282951	-
P01742	IGHV1-69	Immunoglobulin heavy variable 1-69 OS=Homo sapiens OX=9606 GN=IGHV1-69 PE=1 SV=2	12.659	117	1.97814	0.984145	0.01288	0.0292042	+
P08833	IGFBP1	Insulin-like growth factor-binding protein 1 OS=Homo sapiens OX=9606 GN=IGFBP1 PE=1 SV=1	27.904	259	1.95638	0.968185	0.0005286	0.00702319	+
O00299	CLIC1	Chloride intracellular channel protein 1 OS=Homo sapiens OX=9606 GN=CLIC1 PE=1 SV=4	26.923	241	0.574653	-0.799237	0.001078	0.00811858	-
P04275	VWF	von Willebrand factor OS=Homo sapiens OX=9606 GN=VWF PE=1 SV=4	309.265	2813	1.31855	0.398949	0.03201	0.0575191	+
P55290	CDH13	Cadherin-13 OS=Homo sapiens OX=9606 GN=CDH13 PE=1 SV=1	78.287	713	1.3616	0.445298	0.007766	0.0207038	+
P26196	DDX6	Probable ATP-dependent RNA helicase DDX6 OS=Homo sapiens OX=9606 GN=DDX6 PE=1 SV=2	54.417	483	0.561385	-0.832937	0.001091	0.00811858	-
P16989	YBX3	Y-box-binding protein 3 OS=Homo sapiens OX=9606 GN=YBX3 PE=1 SV=4	40.09	372	1.37886	0.46348	0.02154	0.0427648	+
P26583	HMGB2	High mobility group protein B2 OS=Homo sapiens OX=9606 GN=HMGB2 PE=1 SV=2	24.034	209	0.520978	-0.940707	0.006091	0.0176902	-
P33151	CDH5	Cadherin-5 OS=Homo sapiens OX=9606 GN=CDH5 PE=1 SV=5	87.528	784	1.4758	0.561496	0.006172	0.0176902	+
O00429	DNM1L	Dynamin-1-like protein OS=Homo sapiens OX=9606 GN=DNM1L PE=1 SV=2	81.877	736	0.723551	-0.466833	0.0004131	0.00672527	-
O00506	STK25	Serine/threonine-protein kinase 25 OS=Homo sapiens OX=9606 GN=STK25 PE=1 SV=1	48.112	426	0.798978	-0.323772	0.02222	0.0435833	-
O00743	PPP6C	Serine/threonine-protein phosphatase 6 catalytic subunit OS=Homo sapiens OX=9606 GN=PPP6C PE=1 SV=1	35.144	305	0.633867	-0.657749	0.0199	0.0403955	-
Q8IZM9	SLC38A6	Probable sodium-coupled neutral amino acid transporter 6 OS=Homo sapiens OX=9606 GN=SLC38A6 PE=1 SV=2	50.929	456	1.63746	0.711457	0.003697	0.0130416	+
P22352	GPX3	Glutathione peroxidase 3 OS=Homo sapiens OX=9606 GN=GPX3 PE=1 SV=2	25.552	226	1.45845	0.54444	0.01675	0.0353225	+
P26599	PTBP1	Polypyrimidine tract-binding protein 1 OS=Homo sapiens OX=9606 GN=PTBP1 PE=1 SV=1	57.221	531	0.681754	-0.552678	0.0002739	0.00619318	-
Q8N7Z5	ANKRD31	Ankyrin repeat domain-containing protein 31 OS=Homo sapiens OX=9606 GN=ANKRD31 PE=2 SV=2	210.816	1873	1.99448	0.996011	0.001753	0.00932642	+
P26641	EEF1G	Elongation factor 1-gamma OS=Homo sapiens OX=9606 GN=EEF1G PE=1 SV=3	50.119	437	0.588746	-0.764283	0.018	0.0373776	-
P27797	CALR	Calreticulin OS=Homo sapiens OX=9606 GN=CALR PE=1 SV=1	48.142	417	0.624053	-0.68026	0.001691	0.00919499	-
Q8NBP7	PCSK9	Proprotein convertase subtilisin/kexin type 9 OS=Homo sapiens OX=9606 GN=PCSK9 PE=1 SV=3	74.286	692	1.35356	0.436759	0.002577	0.0107163	+
Q14515	SPARCL1	SPARC-like protein 1 OS=Homo sapiens OX=9606 GN=SPARCL1 PE=1 SV=2	75.208	664	1.76441	0.819189	0.00113	0.00811858	+
Q15555	MAPRE2	Microtubule-associated protein RP/EB family member 2 OS=Homo sapiens OX=9606 GN=MAPRE2 PE=1 SV=1	37.031	327	0.381864	-1.38887	0.0002495	0.00619318	-
Q15642	TRIP10	Cdc42-interacting protein 4 OS=Homo sapiens OX=9606 GN=TRIP10 PE=1 SV=3	68.352	601	0.688978	-0.53747	0.01257	0.0285809	-
P04439	HLA-A	HLA class I histocompatibility antigen, A alpha chain OS=Homo sapiens OX=9606 GN=HLA-A PE=1 SV=2	40.841	365	1.83856	0.878577	0.0005248	0.00702319	+
P12259	F5	Coagulation factor V OS=Homo sapiens OX=9606 GN=F5 PE=1 SV=4	251.703	2224	1.60079	0.678788	0.0005084	0.0070142	+
P01743	IGHV1-46	Immunoglobulin heavy variable 1-46 OS=Homo sapiens OX=9606 GN=IGHV1-46 PE=1 SV=2	12.933	117	1.70324	0.768278	0.01034	0.0249755	+
P31146	CORO1A	Coronin-1A OS=Homo sapiens OX=9606 GN=CORO1A PE=1 SV=4	51.026	461	0.546628	-0.871369	2.732e-05	0.0048901	-
O75339	CILP	Cartilage intermediate layer protein 1 OS=Homo sapiens OX=9606 GN=CILP PE=1 SV=4	132.565	1184	1.48968	0.575	0.0003676	0.00670555	+
P01768	IGHV3-30	Immunoglobulin heavy variable 3-30 OS=Homo sapiens OX=9606 GN=IGHV3-30 PE=1 SV=2	12.947	117	1.73078	0.791419	0.01611	0.0343286	+
O14964	HGS	Hepatocyte growth factor-regulated tyrosine kinase substrate OS=Homo sapiens OX=9606 GN=HGS PE=1 SV=1	86.192	777	0.822594	-0.281748	0.0356	0.0627238	-
O15117	FYB1	FYN-binding protein 1 OS=Homo sapiens OX=9606 GN=FYB1 PE=1 SV=2	85.387	783	0.796578	-0.328113	0.04033	0.0689677	-
Q15746	MYLK	Myosin light chain kinase, smooth muscle OS=Homo sapiens OX=9606 GN=MYLK PE=1 SV=4	210.715	1914	0.591656	-0.757169	0.0006227	0.00702319	-
Q8NDA2	HMCN2	Hemicentin-2 OS=Homo sapiens OX=9606 GN=HMCN2 PE=2 SV=3	541.978	5059	1.52197	0.605942	0.004	0.0135891	+
P17931	LGALS3	Galectin-3 OS=Homo sapiens OX=9606 GN=LGALS3 PE=1 SV=5	26.152	250	1.35995	0.443553	0.008484	0.0220638	+
O60664	PLIN3	Perilipin-3 OS=Homo sapiens OX=9606 GN=PLIN3 PE=1 SV=3	47.075	434	1.23349	0.302742	0.01105	0.0261474	+
P31946	YWHAB	14-3-3 protein beta/alpha OS=Homo sapiens OX=9606 GN=YWHAB PE=1 SV=3	28.082	246	0.812936	-0.298785	0.03301	0.0587217	-
Q15942	ZYX	Zyxin OS=Homo sapiens OX=9606 GN=ZYX PE=1 SV=1	61.277	572	0.742632	-0.42928	5.343e-05	0.0048901	-
Q16539	MAPK14	Mitogen-activated protein kinase 14 OS=Homo sapiens OX=9606 GN=MAPK14 PE=1 SV=3	41.293	360	0.570632	-0.809368	0.001263	0.00835583	-
Q4G0F5	VPS26B	Vacuolar protein sorting-associated protein 26B OS=Homo sapiens OX=9606 GN=VPS26B PE=1 SV=2	39.155	336	0.442681	-1.17566	0.004564	0.0143996	-
P08887	IL6R	Interleukin-6 receptor subunit alpha OS=Homo sapiens OX=9606 GN=IL6R PE=1 SV=1	51.548	468	1.76589	0.820398	0.001082	0.00811858	+
Q5JSH3	WDR44	WD repeat-containing protein 44 OS=Homo sapiens OX=9606 GN=WDR44 PE=1 SV=1	101.366	913	0.79337	-0.333934	0.0414	0.0703541	-
O15144	ARPC2	Actin-related protein 2/3 complex subunit 2 OS=Homo sapiens OX=9606 GN=ARPC2 PE=1 SV=1	34.333	300	0.611781	-0.708914	0.0147	0.0317827	-
P31947	SFN	14-3-3 protein sigma OS=Homo sapiens OX=9606 GN=SFN PE=1 SV=1	27.774	248	0.541045	-0.886179	0.003124	0.0118276	-
P55774	CCL18	C-C motif chemokine 18 OS=Homo sapiens OX=9606 GN=CCL18 PE=1 SV=1	9.849	89	2.47818	1.30928	0.0008234	0.00735513	+
P35579	MYH9	Myosin-9 OS=Homo sapiens OX=9606 GN=MYH9 PE=1 SV=4	226.532	1960	0.563894	-0.826505	0.000661	0.00707966	-
O43294	TGFB1I1	Transforming growth factor beta-1-induced transcript 1 protein OS=Homo sapiens OX=9606 GN=TGFB1I1 PE=1 SV=2	49.814	461	0.706519	-0.501199	0.03105	0.0568337	-
P58335	ANTXR2	Anthrax toxin receptor 2 OS=Homo sapiens OX=9606 GN=ANTXR2 PE=1 SV=5	53.666	489	1.39151	0.476647	0.01135	0.0265486	+
Q5SW96	LDLRAP1	Low density lipoprotein receptor adapter protein 1 OS=Homo sapiens OX=9606 GN=LDLRAP1 PE=1 SV=3	33.885	308	0.738705	-0.43693	0.03107	0.0568337	-
Q6PL24	TMED8	Protein TMED8 OS=Homo sapiens OX=9606 GN=TMED8 PE=1 SV=1	35.741	325	0.721216	-0.471497	3.891e-06	0.00316727	-
P17936	IGFBP3	Insulin-like growth factor-binding protein 3 OS=Homo sapiens OX=9606 GN=IGFBP3 PE=1 SV=2	31.674	291	1.4871	0.5725	0.0006448	0.00702319	+
Q70J99	UNC13D	Protein unc-13 homolog D OS=Homo sapiens OX=9606 GN=UNC13D PE=1 SV=1	123.282	1090	0.725807	-0.462341	0.005801	0.017047	-
O43399	TPD52L2	Tumor protein D54 OS=Homo sapiens OX=9606 GN=TPD52L2 PE=1 SV=2	22.238	206	0.792812	-0.334949	0.04882	0.0801199	-
P35611	ADD1	Alpha-adducin OS=Homo sapiens OX=9606 GN=ADD1 PE=1 SV=2	80.955	737	0.699403	-0.515804	0.0008388	0.00735513	-
Q14517	FAT1	Protocadherin Fat 1 OS=Homo sapiens OX=9606 GN=FAT1 PE=1 SV=2	506.273	4588	1.56682	0.647841	0.004937	0.015165	+
P33908	MAN1A1	Mannosyl-oligosaccharide 1,2-alpha-mannosidase IA OS=Homo sapiens OX=9606 GN=MAN1A1 PE=1 SV=3	72.969	653	1.58753	0.666781	0.01199	0.0276483	+
P35813	PPM1A	Protein phosphatase 1A OS=Homo sapiens OX=9606 GN=PPM1A PE=1 SV=1	42.448	382	0.682686	-0.550705	0.004491	0.0143849	-
Q8NES3	LFNG	Beta-1,3-N-acetylglucosaminyltransferase lunatic fringe OS=Homo sapiens OX=9606 GN=LFNG PE=1 SV=2	41.773	379	1.66853	0.738576	0.001717	0.00919499	+
P01599	IGKV1-17	Immunoglobulin kappa variable 1-17 OS=Homo sapiens OX=9606 GN=IGKV1-17 PE=1 SV=2	12.779	117	1.44786	0.533925	0.01894	0.0387366	+
Q7L7X3	TAOK1	Serine/threonine-protein kinase TAO1 OS=Homo sapiens OX=9606 GN=TAOK1 PE=1 SV=1	116.07	1001	0.414476	-1.27064	0.004492	0.0143849	-
O43633	CHMP2A	Charged multivesicular body protein 2a OS=Homo sapiens OX=9606 GN=CHMP2A PE=1 SV=1	25.104	222	0.576326	-0.795044	0.003053	0.0117224	-
P37802	TAGLN2	Transgelin-2 OS=Homo sapiens OX=9606 GN=TAGLN2 PE=1 SV=3	22.391	199	0.693069	-0.528929	0.0004062	0.00672527	-
P02652	APOA2	Apolipoprotein A-II OS=Homo sapiens OX=9606 GN=APOA2 PE=1 SV=1	11.175	100	1.49039	0.575689	0.002237	0.0104037	+
P60866	RPS20	40S ribosomal protein S20 OS=Homo sapiens OX=9606 GN=RPS20 PE=1 SV=1	13.373	119	1.41066	0.496366	0.007256	0.0196169	+
P07711	CTSL	Procathepsin L OS=Homo sapiens OX=9606 GN=CTSL PE=1 SV=2	37.564	333	1.85447	0.891004	0.0008291	0.00735513	+
Q14520	HABP2	Hyaluronan-binding protein 2 OS=Homo sapiens OX=9606 GN=HABP2 PE=1 SV=1	62.672	560	1.57414	0.654568	0.0123	0.0282831	+
P02654	APOC1	Apolipoprotein C-I OS=Homo sapiens OX=9606 GN=APOC1 PE=1 SV=1	9.332	83	1.52809	0.611732	0.002936	0.0116015	+
P37840	SNCA	Alpha-synuclein OS=Homo sapiens OX=9606 GN=SNCA PE=1 SV=1	14.46	140	0.583428	-0.777375	0.0006082	0.00702319	-
P41226	UBA7	Ubiquitin-like modifier-activating enzyme 7 OS=Homo sapiens OX=9606 GN=UBA7 PE=1 SV=2	111.694	1012	0.727936	-0.458117	0.009066	0.0228626	-
Q14554	PDIA5	Protein disulfide-isomerase A5 OS=Homo sapiens OX=9606 GN=PDIA5 PE=1 SV=1	59.594	519	1.34597	0.428644	0.0007866	0.00730288	+
O43852	CALU	Calumenin OS=Homo sapiens OX=9606 GN=CALU PE=1 SV=2	37.107	315	0.715989	-0.48199	0.000149	0.00536637	-
O60610	DIAPH1	Protein diaphanous homolog 1 OS=Homo sapiens OX=9606 GN=DIAPH1 PE=1 SV=2	141.347	1272	0.580513	-0.7846	0.01016	0.0248356	-
P05543	SERPINA7	Thyroxine-binding globulin OS=Homo sapiens OX=9606 GN=SERPINA7 PE=1 SV=2	46.325	415	1.37848	0.463077	0.005668	0.0167773	+
P43405	SYK	Tyrosine-protein kinase SYK OS=Homo sapiens OX=9606 GN=SYK PE=1 SV=1	72.066	635	0.694928	-0.525064	0.008556	0.0221098	-
P09172	DBH	Dopamine beta-hydroxylase OS=Homo sapiens OX=9606 GN=DBH PE=1 SV=3	69.065	617	1.51183	0.596293	8.555e-05	0.00535675	+
P02751	FN1	Fibronectin OS=Homo sapiens OX=9606 GN=FN1 PE=1 SV=5	272.32	2477	1.66545	0.735913	0.0004837	0.0070142	+
Q7LDG7	RASGRP2	RAS guanyl-releasing protein 2 OS=Homo sapiens OX=9606 GN=RASGRP2 PE=1 SV=1	69.248	609	0.558108	-0.841384	0.01081	0.0257291	-
P03951	F11	Coagulation factor XI OS=Homo sapiens OX=9606 GN=F11 PE=1 SV=1	70.109	625	1.78486	0.835809	0.03769	0.0654151	+
P34096	RNASE4	Ribonuclease 4 OS=Homo sapiens OX=9606 GN=RNASE4 PE=1 SV=3	16.84	147	1.68551	0.753184	0.0005712	0.00702319	+
O60763	USO1	General vesicular transport factor p115 OS=Homo sapiens OX=9606 GN=USO1 PE=1 SV=2	107.895	962	0.557359	-0.843321	0.004365	0.0142902	-
P43487	RANBP1	Ran-specific GTPase-activating protein OS=Homo sapiens OX=9606 GN=RANBP1 PE=1 SV=1	23.31	201	0.761768	-0.392577	0.009708	0.0240192	-
P09237	MMP7	Matrilysin OS=Homo sapiens OX=9606 GN=MMP7 PE=1 SV=1	29.677	267	2.12874	1.09	0.02026	0.0409222	+
P08294	SOD3	Extracellular superoxide dismutase [Cu-Zn] OS=Homo sapiens OX=9606 GN=SOD3 PE=1 SV=2	25.851	240	1.35778	0.44125	0.01313	0.0295244	+
O75083	WDR1	WD repeat-containing protein 1 OS=Homo sapiens OX=9606 GN=WDR1 PE=1 SV=4	66.194	606	0.520215	-0.942821	0.006779	0.019028	-
P08493	MGP	Matrix Gla protein OS=Homo sapiens OX=9606 GN=MGP PE=1 SV=2	12.353	103	1.69359	0.760088	0.001277	0.00835583	+
P02656	APOC3	Apolipoprotein C-III OS=Homo sapiens OX=9606 GN=APOC3 PE=1 SV=1	10.852	99	1.40601	0.491603	0.01399	0.0306125	+
P43686	PSMC4	26S proteasome regulatory subunit 6B OS=Homo sapiens OX=9606 GN=PSMC4 PE=1 SV=2	47.366	418	0.610036	-0.713033	0.001556	0.00891961	-
O75608	LYPLA1	Acyl-protein thioesterase 1 OS=Homo sapiens OX=9606 GN=LYPLA1 PE=1 SV=1	24.67	230	0.543627	-0.879311	0.0006038	0.00702319	-
O95967	EFEMP2	EGF-containing fibulin-like extracellular matrix protein 2 OS=Homo sapiens OX=9606 GN=EFEMP2 PE=1 SV=3	49.405	443	1.34637	0.429076	0.0076	0.02035	+
Q86TP1	PRUNE1	Exopolyphosphatase PRUNE1 OS=Homo sapiens OX=9606 GN=PRUNE1 PE=1 SV=2	50.2	453	0.618983	-0.692027	0.002275	0.0104037	-
P04004	VTN	Vitronectin OS=Homo sapiens OX=9606 GN=VTN PE=1 SV=1	54.306	478	1.43409	0.520136	0.008526	0.0221024	+
P09382	LGALS1	Galectin-1 OS=Homo sapiens OX=9606 GN=LGALS1 PE=1 SV=2	14.716	135	1.43402	0.520067	0.002428	0.0105226	+
Q8NG48	LINS1	Protein Lines homolog 1 OS=Homo sapiens OX=9606 GN=LINS1 PE=2 SV=2	85.857	757	1.75341	0.810161	0.000563	0.00702319	+
Q8NI99	ANGPTL6	Angiopoietin-related protein 6 OS=Homo sapiens OX=9606 GN=ANGPTL6 PE=1 SV=1	51.694	470	1.31816	0.398523	0.007928	0.0210208	+
P01814	IGHV2-70	Immunoglobulin heavy variable 2-70 OS=Homo sapiens OX=9606 GN=IGHV2-70 PE=1 SV=2	13.26	119	2.31991	1.21407	0.03241	0.0579997	+
Q86UX7	FERMT3	Fermitin family homolog 3 OS=Homo sapiens OX=9606 GN=FERMT3 PE=1 SV=1	75.953	667	0.580069	-0.785703	0.006248	0.0178452	-
P48059	LIMS1	LIM and senescent cell antigen-like-containing domain protein 1 OS=Homo sapiens OX=9606 GN=LIMS1 PE=1 SV=4	37.251	325	0.508182	-0.976583	0.001025	0.00810049	-
Q14623	IHH	Indian hedgehog protein OS=Homo sapiens OX=9606 GN=IHH PE=1 SV=4	45.251	411	1.25984	0.333241	0.03251	0.0580332	+
P48426	PIP4K2A	Phosphatidylinositol 5-phosphate 4-kinase type-2 alpha OS=Homo sapiens OX=9606 GN=PIP4K2A PE=1 SV=2	46.225	406	0.701818	-0.510831	0.005515	0.016444	-
P61626	LYZ	Lysozyme C OS=Homo sapiens OX=9606 GN=LYZ PE=1 SV=1	16.537	148	1.74053	0.799527	0.004802	0.0149764	+
P61769	B2M	Beta-2-microglobulin OS=Homo sapiens OX=9606 GN=B2M PE=1 SV=1	13.715	119	1.25347	0.325923	0.03169	0.0573418	+
P02753	RBP4	Retinol-binding protein 4 OS=Homo sapiens OX=9606 GN=RBP4 PE=1 SV=3	23.01	201	1.59561	0.674112	0.004069	0.0136145	+
P48556	PSMD8	26S proteasome non-ATPase regulatory subunit 8 OS=Homo sapiens OX=9606 GN=PSMD8 PE=1 SV=2	39.612	350	0.699568	-0.515463	0.003523	0.0128597	-
P62987	UBA52	Ubiquitin-60S ribosomal protein L40 OS=Homo sapiens OX=9606 GN=UBA52 PE=1 SV=2	14.728	128	1.62281	0.698495	0.0002596	0.00619318	+
P78509	RELN	Reelin OS=Homo sapiens OX=9606 GN=RELN PE=1 SV=3	388.388	3460	1.66788	0.73802	0.001701	0.00919499	+
Q8TB40	ABHD4	(Lyso)-N-acylphosphatidylethanolamine lipase OS=Homo sapiens OX=9606 GN=ABHD4 PE=1 SV=1	38.794	342	1.38879	0.473829	0.004416	0.0142902	+
P80108	GPLD1	Phosphatidylinositol-glycan-specific phospholipase D OS=Homo sapiens OX=9606 GN=GPLD1 PE=1 SV=3	92.336	840	1.45285	0.538884	0.04585	0.076012	+
Q8N392	ARHGAP18	Rho GTPase-activating protein 18 OS=Homo sapiens OX=9606 GN=ARHGAP18 PE=1 SV=3	74.977	663	0.712188	-0.48967	0.009072	0.0228626	-
Q8NBF2	NHLRC2	NHL repeat-containing protein 2 OS=Homo sapiens OX=9606 GN=NHLRC2 PE=1 SV=1	79.444	726	0.764032	-0.388295	0.02741	0.0517674	-
Q8TF42	UBASH3B	Ubiquitin-associated and SH3 domain-containing protein B OS=Homo sapiens OX=9606 GN=UBASH3B PE=1 SV=2	72.696	649	0.640343	-0.643082	0.01603	0.0342478	-
Q92619	ARHGAP45	Rho GTPase-activating protein 45 OS=Homo sapiens OX=9606 GN=ARHGAP45 PE=1 SV=2	124.614	1136	0.742308	-0.42991	0.04155	0.0704619	-
Q969T9	WBP2	WW domain-binding protein 2 OS=Homo sapiens OX=9606 GN=WBP2 PE=1 SV=1	28.087	261	0.734906	-0.444369	0.001463	0.00871216	-
Q8TDL5	BPIFB1	BPI fold-containing family B member 1 OS=Homo sapiens OX=9606 GN=BPIFB1 PE=1 SV=1	52.442	484	1.67343	0.742811	0.01737	0.0363475	+
Q96A00	PPP1R14A	Protein phosphatase 1 regulatory subunit 14A OS=Homo sapiens OX=9606 GN=PPP1R14A PE=1 SV=1	16.693	147	0.315001	-1.66657	0.0002158	0.00605728	-
P48643	CCT5	T-complex protein 1 subunit epsilon OS=Homo sapiens OX=9606 GN=CCT5 PE=1 SV=1	59.671	541	0.598558	-0.740436	6.239e-05	0.0048901	-
Q96QK1	VPS35	Vacuolar protein sorting-associated protein 35 OS=Homo sapiens OX=9606 GN=VPS35 PE=1 SV=2	91.707	796	0.816977	-0.291633	0.006954	0.0192536	-
P84095	RHOG	Rho-related GTP-binding protein RhoG OS=Homo sapiens OX=9606 GN=RHOG PE=1 SV=1	21.309	191	1.22117	0.288267	0.03945	0.0678907	+
P49593	PPM1F	Protein phosphatase 1F OS=Homo sapiens OX=9606 GN=PPM1F PE=1 SV=3	49.831	454	0.741768	-0.430959	0.008043	0.0212565	-
O76074	PDE5A	cGMP-specific 3',5'-cyclic phosphodiesterase OS=Homo sapiens OX=9606 GN=PDE5A PE=1 SV=2	99.985	875	0.653846	-0.612977	0.006387	0.018115	-
P22692	IGFBP4	Insulin-like growth factor-binding protein 4 OS=Homo sapiens OX=9606 GN=IGFBP4 PE=1 SV=2	27.934	258	1.64737	0.72016	0.0003707	0.00670555	+
Q99439	CNN2	Calponin-2 OS=Homo sapiens OX=9606 GN=CNN2 PE=1 SV=4	33.697	309	0.482692	-1.05083	0.0009995	0.00801231	-
P86791	CCZ1	Vacuolar fusion protein CCZ1 homolog OS=Homo sapiens OX=9606 GN=CCZ1 PE=1 SV=1	55.866	482	1.40702	0.49264	0.0001149	0.00536637	+
P50453	SERPINB9	Serpin B9 OS=Homo sapiens OX=9606 GN=SERPINB9 PE=1 SV=1	42.404	376	0.639311	-0.645411	0.001286	0.00835583	-
P98160	HSPG2	Basement membrane-specific heparan sulfate proteoglycan core protein OS=Homo sapiens OX=9606 GN=HSPG2 PE=1 SV=4	468.83	4391	1.56771	0.648654	0.0005082	0.0070142	+
P18065	IGFBP2	Insulin-like growth factor-binding protein 2 OS=Homo sapiens OX=9606 GN=IGFBP2 PE=1 SV=2	34.814	325	1.64753	0.720304	0.03442	0.0607763	+
P50552	VASP	Vasodilator-stimulated phosphoprotein OS=Homo sapiens OX=9606 GN=VASP PE=1 SV=3	39.83	380	0.583055	-0.778296	0.00104	0.00811858	-
O95747	OXSR1	Serine/threonine-protein kinase OSR1 OS=Homo sapiens OX=9606 GN=OXSR1 PE=1 SV=1	58.022	527	0.749344	-0.4163	0.009586	0.0237896	-
Q8WUJ3	CEMIP	Cell migration-inducing and hyaluronan-binding protein OS=Homo sapiens OX=9606 GN=CEMIP PE=1 SV=2	152.998	1361	1.42915	0.515159	0.01648	0.0349342	+
P50990	CCT8	T-complex protein 1 subunit theta OS=Homo sapiens OX=9606 GN=CCT8 PE=1 SV=4	59.621	548	0.605277	-0.724333	0.0001112	0.00536637	-
Q8WWA0	ITLN1	Intelectin-1 OS=Homo sapiens OX=9606 GN=ITLN1 PE=1 SV=1	34.962	313	1.38098	0.465688	0.03031	0.0558198	+
P01817	IGHV2-5	Immunoglobulin heavy variable 2-5 OS=Homo sapiens OX=9606 GN=IGHV2-5 PE=1 SV=2	13.231	119	1.50322	0.588052	0.02603	0.0496216	+
Q8WWZ8	OIT3	Oncoprotein-induced transcript 3 protein OS=Homo sapiens OX=9606 GN=OIT3 PE=1 SV=2	60.022	545	1.77562	0.828323	0.001189	0.0083435	+
P50991	CCT4	T-complex protein 1 subunit delta OS=Homo sapiens OX=9606 GN=CCT4 PE=1 SV=4	57.924	539	0.57621	-0.795335	2.606e-05	0.0048901	-
P35542	SAA4	Serum amyloid A-4 protein OS=Homo sapiens OX=9606 GN=SAA4 PE=1 SV=2	14.747	130	1.65524	0.727042	0.00186	0.00973728	+
Q99733	NAP1L4	Nucleosome assembly protein 1-like 4 OS=Homo sapiens OX=9606 GN=NAP1L4 PE=1 SV=1	42.823	375	0.501079	-0.996889	0.0004578	0.0070142	-
P50995	ANXA11	Annexin A11 OS=Homo sapiens OX=9606 GN=ANXA11 PE=1 SV=1	54.39	505	0.745383	-0.423945	0.003637	0.0130416	-
P18428	LBP	Lipopolysaccharide-binding protein OS=Homo sapiens OX=9606 GN=LBP PE=1 SV=3	53.384	481	1.83368	0.874741	0.002529	0.0106114	+
O95810	CAVIN2	Caveolae-associated protein 2 OS=Homo sapiens OX=9606 GN=CAVIN2 PE=1 SV=3	47.173	425	0.414624	-1.27013	0.0004481	0.0070142	-
Q99832	CCT7	T-complex protein 1 subunit eta OS=Homo sapiens OX=9606 GN=CCT7 PE=1 SV=2	59.367	543	0.7811	-0.35642	0.0005854	0.00702319	-
Q9BUL8	PDCD10	Programmed cell death protein 10 OS=Homo sapiens OX=9606 GN=PDCD10 PE=1 SV=1	24.702	212	0.470177	-1.08872	0.006157	0.0176902	-
P09871	C1S	Complement C1s subcomponent OS=Homo sapiens OX=9606 GN=C1S PE=1 SV=1	76.684	688	1.47985	0.565453	0.002143	0.0101845	+
Q9H2K8	TAOK3	Serine/threonine-protein kinase TAO3 OS=Homo sapiens OX=9606 GN=TAOK3 PE=1 SV=2	105.406	898	0.669826	-0.578142	0.0125	0.0285014	-
Q14624	ITIH4	Inter-alpha-trypsin inhibitor heavy chain H4 OS=Homo sapiens OX=9606 GN=ITIH4 PE=1 SV=4	103.357	930	1.52894	0.61253	0.0001645	0.00536637	+
Q00796	SORD	Sorbitol dehydrogenase OS=Homo sapiens OX=9606 GN=SORD PE=1 SV=4	38.325	357	1.40582	0.491408	0.02424	0.0466462	+
P51452	DUSP3	Dual specificity protein phosphatase 3 OS=Homo sapiens OX=9606 GN=DUSP3 PE=1 SV=1	20.478	185	0.65051	-0.620357	0.01011	0.0248356	-
P19021	PAM	Peptidyl-glycine alpha-amidating monooxygenase OS=Homo sapiens OX=9606 GN=PAM PE=1 SV=2	108.332	973	1.36275	0.44652	0.004276	0.014149	+
P12724	RNASE3	Eosinophil cationic protein OS=Homo sapiens OX=9606 GN=RNASE3 PE=1 SV=2	18.385	160	1.55904	0.640658	0.002403	0.0105226	+
P23083	IGHV1-2	Immunoglobulin heavy variable 1-2 OS=Homo sapiens OX=9606 GN=IGHV1-2 PE=1 SV=2	13.085	117	2.06125	1.04352	0.0049	0.0151083	+
Q92626	PXDN	Peroxidasin homolog OS=Homo sapiens OX=9606 GN=PXDN PE=1 SV=2	165.275	1479	1.70711	0.771558	0.001287	0.00835583	+
P35555	FBN1	Fibrillin-1 OS=Homo sapiens OX=9606 GN=FBN1 PE=1 SV=4	312.298	2871	1.3058	0.38493	0.04825	0.0793444	+
P02649	APOE	Apolipoprotein E OS=Homo sapiens OX=9606 GN=APOE PE=1 SV=1	36.154	317	1.67332	0.74271	0.004853	0.0150389	+
P51692	STAT5B	Signal transducer and activator of transcription 5B OS=Homo sapiens OX=9606 GN=STAT5B PE=1 SV=2	89.866	787	0.792204	-0.336057	0.001111	0.00811858	-
P53618	COPB1	Coatomer subunit beta OS=Homo sapiens OX=9606 GN=COPB1 PE=1 SV=3	107.142	953	0.660315	-0.598773	0.04933	0.0806318	-
Q9H3U1	UNC45A	Protein unc-45 homolog A OS=Homo sapiens OX=9606 GN=UNC45A PE=1 SV=1	103.077	944	0.491638	-1.02433	0.00404	0.0135891	-
Q9H4M9	EHD1	EH domain-containing protein 1 OS=Homo sapiens OX=9606 GN=EHD1 PE=1 SV=2	60.627	534	0.589563	-0.762281	0.00206	0.0101845	-
P00338	LDHA	L-lactate dehydrogenase A chain OS=Homo sapiens OX=9606 GN=LDHA PE=1 SV=2	36.689	332	0.719201	-0.475534	0.00635	0.0180731	-
P12830	CDH1	Cadherin-1 OS=Homo sapiens OX=9606 GN=CDH1 PE=1 SV=3	97.456	882	1.46613	0.552011	0.003948	0.0135804	+
P01137	TGFB1	Transforming growth factor beta-1 proprotein OS=Homo sapiens OX=9606 GN=TGFB1 PE=1 SV=2	44.341	390	0.68707	-0.54147	0.002152	0.0101845	-
Q02487	DSC2	Desmocollin-2 OS=Homo sapiens OX=9606 GN=DSC2 PE=1 SV=1	99.962	901	1.59453	0.67313	0.001004	0.00801231	+
P02774	GC	Vitamin D-binding protein OS=Homo sapiens OX=9606 GN=GC PE=1 SV=2	52.918	474	0.686605	-0.542447	0.0107	0.0255419	-
Q9H7J1	PPP1R3E	Protein phosphatase 1 regulatory subunit 3E OS=Homo sapiens OX=9606 GN=PPP1R3E PE=1 SV=2	30.644	279	0.620765	-0.687881	0.005235	0.0157946	-
P02775	PPBP	Platelet basic protein OS=Homo sapiens OX=9606 GN=PPBP PE=1 SV=3	13.894	128	0.610868	-0.711066	0.02247	0.0437936	-
P06276	BCHE	Cholinesterase OS=Homo sapiens OX=9606 GN=BCHE PE=1 SV=1	68.418	602	1.53427	0.617551	0.002265	0.0104037	+
Q9H8S9	MOB1A	MOB kinase activator 1A OS=Homo sapiens OX=9606 GN=MOB1A PE=1 SV=4	25.08	216	0.626329	-0.675007	0.008958	0.0227159	-
P01034	CST3	Cystatin-C OS=Homo sapiens OX=9606 GN=CST3 PE=1 SV=1	15.799	146	1.53533	0.618548	0.004519	0.0143849	+
Q9HBI1	PARVB	Beta-parvin OS=Homo sapiens OX=9606 GN=PARVB PE=1 SV=1	41.714	364	0.584652	-0.77435	0.001289	0.00835583	-
Q14738	PPP2R5D	Serine/threonine-protein phosphatase 2A 56 kDa regulatory subunit delta isoform OS=Homo sapiens OX=9606 GN=PPP2R5D PE=1 SV=1	69.992	602	1.25173	0.323918	0.04572	0.0759512	+
Q92743	HTRA1	Serine protease HTRA1 OS=Homo sapiens OX=9606 GN=HTRA1 PE=1 SV=1	51.287	480	1.64539	0.718432	0.003407	0.0125894	+
Q9NQW7	XPNPEP1	Xaa-Pro aminopeptidase 1 OS=Homo sapiens OX=9606 GN=XPNPEP1 PE=1 SV=3	69.918	623	0.560372	-0.835544	0.007254	0.0196169	-
Q9NYU2	UGGT1	UDP-glucose:glycoprotein glucosyltransferase 1 OS=Homo sapiens OX=9606 GN=UGGT1 PE=1 SV=3	177.19	1555	0.770105	-0.376872	0.00141	0.00862962	-
P53621	COPA	Coatomer subunit alpha OS=Homo sapiens OX=9606 GN=COPA PE=1 SV=2	138.346	1224	0.58243	-0.779844	0.02758	0.0519679	-
P02765	AHSG	Alpha-2-HS-glycoprotein OS=Homo sapiens OX=9606 GN=AHSG PE=1 SV=2	39.341	367	1.42152	0.507433	0.02887	0.0538995	+
P54727	RAD23B	UV excision repair protein RAD23 homolog B OS=Homo sapiens OX=9606 GN=RAD23B PE=1 SV=1	43.171	409	0.680633	-0.555052	7.209e-05	0.0048901	-
Q9NZN3	EHD3	EH domain-containing protein 3 OS=Homo sapiens OX=9606 GN=EHD3 PE=1 SV=2	60.887	535	0.651489	-0.618187	0.002673	0.0107304	-
Q9UBW5	BIN2	Bridging integrator 2 OS=Homo sapiens OX=9606 GN=BIN2 PE=1 SV=3	61.874	565	0.572957	-0.8035	0.000178	0.00536637	-
P13497	BMP1	Bone morphogenetic protein 1 OS=Homo sapiens OX=9606 GN=BMP1 PE=1 SV=2	111.249	986	1.58357	0.663184	0.01027	0.0249546	+
P54920	NAPA	Alpha-soluble NSF attachment protein OS=Homo sapiens OX=9606 GN=NAPA PE=1 SV=3	33.233	295	0.759154	-0.397535	0.007278	0.0196169	-
Q03167	TGFBR3	Transforming growth factor beta receptor type 3 OS=Homo sapiens OX=9606 GN=TGFBR3 PE=1 SV=3	93.499	851	1.53007	0.613593	0.01399	0.0306125	+
Q9UJU6	DBNL	Drebrin-like protein OS=Homo sapiens OX=9606 GN=DBNL PE=1 SV=1	48.207	430	0.644681	-0.633342	0.0008562	0.00735513	-
P55060	CSE1L	Exportin-2 OS=Homo sapiens OX=9606 GN=CSE1L PE=1 SV=3	110.417	971	0.793373	-0.333929	0.004353	0.0142902	-
P08571	CD14	Monocyte differentiation antigen CD14 OS=Homo sapiens OX=9606 GN=CD14 PE=1 SV=2	40.076	375	1.49786	0.582903	0.004859	0.0150389	+
P55072	VCP	Transitional endoplasmic reticulum ATPase OS=Homo sapiens OX=9606 GN=VCP PE=1 SV=4	89.322	806	0.659434	-0.6007	0.002957	0.011628	-
P06681	C2	Complement C2 OS=Homo sapiens OX=9606 GN=C2 PE=1 SV=2	83.268	752	1.37068	0.454889	0.003567	0.0129622	+
Q03591	CFHR1	Complement factor H-related protein 1 OS=Homo sapiens OX=9606 GN=CFHR1 PE=1 SV=2	37.651	330	1.57884	0.658861	0.04531	0.075424	+
Q9ULV4	CORO1C	Coronin-1C OS=Homo sapiens OX=9606 GN=CORO1C PE=1 SV=1	53.249	474	0.499209	-1.00228	0.001098	0.00811858	-
Q04721	NOTCH2	Neurogenic locus notch homolog protein 2 OS=Homo sapiens OX=9606 GN=NOTCH2 PE=1 SV=3	265.405	2471	1.36582	0.449769	0.004381	0.0142902	+
Q92954	PRG4	Proteoglycan 4 OS=Homo sapiens OX=9606 GN=PRG4 PE=1 SV=3	151.061	1404	1.64863	0.721265	0.00441	0.0142902	+
P05019	IGF1	Insulin-like growth factor I OS=Homo sapiens OX=9606 GN=IGF1 PE=1 SV=1	21.841	195	1.36377	0.447599	0.005881	0.0172199	+
Q9UN37	VPS4A	Vacuolar protein sorting-associated protein 4A OS=Homo sapiens OX=9606 GN=VPS4A PE=1 SV=1	48.898	437	0.737038	-0.440189	0.02809	0.0528066	-
Q96GD4	AURKB	Aurora kinase B OS=Homo sapiens OX=9606 GN=AURKB PE=1 SV=3	39.311	344	1.64806	0.720764	0.003339	0.0124107	+
P36915	GNL1	Guanine nucleotide-binding protein-like 1 OS=Homo sapiens OX=9606 GN=GNL1 PE=1 SV=2	68.661	607	1.29603	0.374103	0.03242	0.0579997	+
P36955	SERPINF1	Pigment epithelium-derived factor OS=Homo sapiens OX=9606 GN=SERPINF1 PE=1 SV=4	46.312	418	1.45569	0.541701	0.004033	0.0135891	+
P02776	PF4	Platelet factor 4 OS=Homo sapiens OX=9606 GN=PF4 PE=1 SV=2	10.845	101	0.612459	-0.707315	0.002935	0.0116015	-
P19320	VCAM1	Vascular cell adhesion protein 1 OS=Homo sapiens OX=9606 GN=VCAM1 PE=1 SV=1	81.276	739	1.54463	0.627262	0.004768	0.0149275	+
P02671	FGA	Fibrinogen alpha chain OS=Homo sapiens OX=9606 GN=FGA PE=1 SV=2	94.973	866	1.79973	0.84778	0.0001912	0.00555846	+
Q9UNF0	PACSIN2	Protein kinase C and casein kinase substrate in neurons protein 2 OS=Homo sapiens OX=9606 GN=PACSIN2 PE=1 SV=2	55.739	486	0.737835	-0.438629	0.0316	0.0573418	-
Q9Y2B0	CNPY2	Protein canopy homolog 2 OS=Homo sapiens OX=9606 GN=CNPY2 PE=1 SV=1	20.652	182	0.593696	-0.752205	9.466e-05	0.00536637	-
Q15063	POSTN	Periostin OS=Homo sapiens OX=9606 GN=POSTN PE=1 SV=2	93.314	836	1.38855	0.473574	0.00113	0.00811858	+
Q9Y490	TLN1	Talin-1 OS=Homo sapiens OX=9606 GN=TLN1 PE=1 SV=3	269.767	2541	0.598451	-0.740694	0.005239	0.0157946	-
P55160	NCKAP1L	Nck-associated protein 1-like OS=Homo sapiens OX=9606 GN=NCKAP1L PE=1 SV=3	128.153	1127	0.643675	-0.635595	0.01868	0.0383978	-
P01825	IGHV4-59	Immunoglobulin heavy variable 4-59 OS=Homo sapiens OX=9606 GN=IGHV4-59 PE=1 SV=2	12.936	116	1.53097	0.614445	0.02265	0.0437936	+
P55786	NPEPPS	Puromycin-sensitive aminopeptidase OS=Homo sapiens OX=9606 GN=NPEPPS PE=1 SV=2	103.276	919	0.645367	-0.631808	0.02078	0.0416624	-
P60660	MYL6	Myosin light polypeptide 6 OS=Homo sapiens OX=9606 GN=MYL6 PE=1 SV=2	16.93	151	0.650328	-0.620761	0.0006357	0.00702319	-
Q9Y6E0	STK24	Serine/threonine-protein kinase 24 OS=Homo sapiens OX=9606 GN=STK24 PE=1 SV=1	49.308	443	0.760406	-0.395158	0.03964	0.0680738	-
A0AVF1	TTC26	Intraflagellar transport protein 56 OS=Homo sapiens OX=9606 GN=TTC26 PE=2 SV=1	64.178	554	2.41451	1.27173	0.0368	0.0641439	+
P04406	GAPDH	Glyceraldehyde-3-phosphate dehydrogenase OS=Homo sapiens OX=9606 GN=GAPDH PE=1 SV=3	36.053	335	0.550463	-0.861283	0.0021	0.0101845	-
P39060	COL18A1	Collagen alpha-1(XVIII) chain OS=Homo sapiens OX=9606 GN=COL18A1 PE=1 SV=5	178.188	1754	1.47509	0.560805	0.001536	0.00890782	+
P05198	EIF2S1	Eukaryotic translation initiation factor 2 subunit 1 OS=Homo sapiens OX=9606 GN=EIF2S1 PE=1 SV=3	36.112	315	0.788251	-0.343273	0.008206	0.0215474	-
A0A075B6I9	IGLV7-46	Immunoglobulin lambda variable 7-46 OS=Homo sapiens OX=9606 GN=IGLV7-46 PE=3 SV=4	12.468	117	1.28644	0.36339	0.3498	0.405609
A0A075B6K0	IGLV3-16	Immunoglobulin lambda variable 3-16 OS=Homo sapiens OX=9606 GN=IGLV3-16 PE=3 SV=2	12.466	115	1.32214	0.402871	0.126	0.173095
A0A075B6K6	IGLV4-3	Immunoglobulin lambda variable 4-3 OS=Homo sapiens OX=9606 GN=IGLV4-3 PE=3 SV=1	13.33	122	0.868341	-0.203667	0.6969	0.735767
A0A0B4J1U7	IGHV6-1	Immunoglobulin heavy variable 6-1 OS=Homo sapiens OX=9606 GN=IGHV6-1 PE=3 SV=1	13.481	121	1.19447	0.256376	0.465	0.525708
A0A0B4J1V0	IGHV3-15	Immunoglobulin heavy variable 3-15 OS=Homo sapiens OX=9606 GN=IGHV3-15 PE=3 SV=1	12.926	119	1.40106	0.486518	0.1374	0.186367
A0A0B4J1V6	IGHV3-73	Immunoglobulin heavy variable 3-73 OS=Homo sapiens OX=9606 GN=IGHV3-73 PE=3 SV=1	12.858	119	1.39728	0.482621	0.1727	0.223139
A0A0B4J1Y9	IGHV3-72	Immunoglobulin heavy variable 3-72 OS=Homo sapiens OX=9606 GN=IGHV3-72 PE=3 SV=1	13.203	119	1.17256	0.229662	0.5864	0.638995
A0A0C4DH24	IGKV6-21	Immunoglobulin kappa variable 6-21 OS=Homo sapiens OX=9606 GN=IGKV6-21 PE=3 SV=1	12.43	114	1.20352	0.267255	0.6147	0.664047
A0A0C4DH34	IGHV4-28	Immunoglobulin heavy variable 4-28 OS=Homo sapiens OX=9606 GN=IGHV4-28 PE=3 SV=1	13.124	117	1.70635	0.77091	0.07444	0.11311
A0A0C4DH72	IGKV1-6	Immunoglobulin kappa variable 1-6 OS=Homo sapiens OX=9606 GN=IGKV1-6 PE=3 SV=1	12.697	117	1.17493	0.232573	0.08818	0.127493
A0A0J9YX35	IGHV3-64D	Immunoglobulin heavy variable 3-64D OS=Homo sapiens OX=9606 GN=IGHV3-64D PE=3 SV=1	12.823	117	1.28445	0.361154	0.1568	0.206327
A6NDG6	PGP	Glycerol-3-phosphate phosphatase OS=Homo sapiens OX=9606 GN=PGP PE=1 SV=1	34.006	321	1.16662	0.222329	0.03183	0.0573582
O00139	KIF2A	Kinesin-like protein KIF2A OS=Homo sapiens OX=9606 GN=KIF2A PE=1 SV=3	79.955	706	0.791999	-0.33643	0.06265	0.0976956
O00194	RAB27B	Ras-related protein Rab-27B OS=Homo sapiens OX=9606 GN=RAB27B PE=1 SV=4	24.608	218	0.799236	-0.323306	0.127	0.174037
O00410	IPO5	Importin-5 OS=Homo sapiens OX=9606 GN=IPO5 PE=1 SV=4	123.63	1097	0.864437	-0.210167	0.04316	0.0724376
O00602	FCN1	Ficolin-1 OS=Homo sapiens OX=9606 GN=FCN1 PE=1 SV=2	35.078	326	1.04166	0.0588894	0.7754	0.806099
O14775	GNB5	Guanine nucleotide-binding protein subunit beta-5 OS=Homo sapiens OX=9606 GN=GNB5 PE=1 SV=2	43.566	395	1.0358	0.0507424	0.6867	0.728779
O14818	PSMA7	Proteasome subunit alpha type-7 OS=Homo sapiens OX=9606 GN=PSMA7 PE=1 SV=1	27.887	248	1.10417	0.142965	0.5597	0.619016
O14980	XPO1	Exportin-1 OS=Homo sapiens OX=9606 GN=XPO1 PE=1 SV=1	123.386	1071	0.967958	-0.0469833	0.6105	0.660834
O43242	PSMD3	26S proteasome non-ATPase regulatory subunit 3 OS=Homo sapiens OX=9606 GN=PSMD3 PE=1 SV=2	60.978	534	1.04617	0.0651236	0.5842	0.637451
O43324	EEF1E1	Eukaryotic translation elongation factor 1 epsilon-1 OS=Homo sapiens OX=9606 GN=EEF1E1 PE=1 SV=1	19.811	174	0.823723	-0.279768	0.1282	0.175386
O43488	AKR7A2	Aflatoxin B1 aldehyde reductase member 2 OS=Homo sapiens OX=9606 GN=AKR7A2 PE=1 SV=3	39.589	359	1.15724	0.210685	0.2136	0.266264
O43707	ACTN4	Alpha-actinin-4 OS=Homo sapiens OX=9606 GN=ACTN4 PE=1 SV=2	104.854	911	0.821998	-0.282793	0.1388	0.187368
O43765	SGTA	Small glutamine-rich tetratricopeptide repeat-containing protein alpha OS=Homo sapiens OX=9606 GN=SGTA PE=1 SV=1	34.063	313	1.1954	0.257498	0.04504	0.0751282
O43768	ENSA	Alpha-endosulfine OS=Homo sapiens OX=9606 GN=ENSA PE=1 SV=1	13.389	121	1.04705	0.0663269	0.3567	0.412434
O43866	CD5L	CD5 antigen-like OS=Homo sapiens OX=9606 GN=CD5L PE=1 SV=1	38.088	347	1.36297	0.446753	0.1672	0.217673
O60496	DOK2	Docking protein 2 OS=Homo sapiens OX=9606 GN=DOK2 PE=1 SV=2	45.379	412	1.06544	0.0914463	0.5037	0.563978
O60749	SNX2	Sorting nexin-2 OS=Homo sapiens OX=9606 GN=SNX2 PE=1 SV=2	58.471	519	0.966812	-0.0486932	0.712	0.74783
O60832	DKC1	H/ACA ribonucleoprotein complex subunit DKC1 OS=Homo sapiens OX=9606 GN=DKC1 PE=1 SV=3	57.674	514	1.42608	0.512053	0.1243	0.171492
O60888	CUTA	Protein CutA OS=Homo sapiens OX=9606 GN=CUTA PE=1 SV=2	19.116	179	1.09313	0.128462	0.2575	0.311912
O75443	TECTA	Alpha-tectorin OS=Homo sapiens OX=9606 GN=TECTA PE=1 SV=3	239.527	2155	1.10563	0.144862	0.7095	0.746167
O75563	SKAP2	Src kinase-associated phosphoprotein 2 OS=Homo sapiens OX=9606 GN=SKAP2 PE=1 SV=1	41.217	359	1.04436	0.0626256	0.3398	0.397995
O75874	IDH1	Isocitrate dehydrogenase [NADP] cytoplasmic OS=Homo sapiens OX=9606 GN=IDH1 PE=1 SV=2	46.659	414	1.03077	0.0437159	0.8697	0.888251
O76003	GLRX3	Glutaredoxin-3 OS=Homo sapiens OX=9606 GN=GLRX3 PE=1 SV=2	37.432	335	0.841353	-0.249216	0.02234	0.0437134
O94804	STK10	Serine/threonine-protein kinase 10 OS=Homo sapiens OX=9606 GN=STK10 PE=1 SV=1	112.135	968	0.837898	-0.255154	0.022	0.043256
O94979	SEC31A	Protein transport protein Sec31A OS=Homo sapiens OX=9606 GN=SEC31A PE=1 SV=3	133.015	1220	1.07695	0.106956	0.2309	0.283061
O95319	CELF2	CUGBP Elav-like family member 2 OS=Homo sapiens OX=9606 GN=CELF2 PE=1 SV=1	54.285	508	0.85301	-0.229366	0.0629	0.0977111
P00352	ALDH1A1	Retinal dehydrogenase 1 OS=Homo sapiens OX=9606 GN=ALDH1A1 PE=1 SV=2	54.862	501	1.40853	0.494193	0.1735	0.223818
P00390	GSR	Glutathione reductase, mitochondrial OS=Homo sapiens OX=9606 GN=GSR PE=1 SV=2	56.257	522	0.768702	-0.379504	0.07128	0.108859
P00488	F13A1	Coagulation factor XIII A chain OS=Homo sapiens OX=9606 GN=F13A1 PE=1 SV=4	83.267	732	1.13336	0.18061	0.05502	0.0878162
P00568	AK1	Adenylate kinase isoenzyme 1 OS=Homo sapiens OX=9606 GN=AK1 PE=1 SV=3	21.635	194	1.04205	0.0594291	0.7854	0.814415
P00739	HPR	Haptoglobin-related protein OS=Homo sapiens OX=9606 GN=HPR PE=2 SV=2	39.03	348	1.43832	0.524386	0.1376	0.186367
P00740	F9	Coagulation factor IX OS=Homo sapiens OX=9606 GN=F9 PE=1 SV=2	51.778	461	1.31164	0.391374	0.05571	0.0882256
P00751	CFB	Complement factor B OS=Homo sapiens OX=9606 GN=CFB PE=1 SV=2	85.533	764	1.3402	0.422443	0.1028	0.145276
P01008	SERPINC1	Antithrombin-III OS=Homo sapiens OX=9606 GN=SERPINC1 PE=1 SV=1	52.602	464	1.28213	0.358545	0.1173	0.162939
P01009	SERPINA1	Alpha-1-antitrypsin OS=Homo sapiens OX=9606 GN=SERPINA1 PE=1 SV=3	46.737	418	1.30381	0.38273	0.07615	0.115216
P01024	C3	Complement C3 OS=Homo sapiens OX=9606 GN=C3 PE=1 SV=2	187.148	1663	1.35552	0.43885	0.05553	0.0881278
P01033	TIMP1	Metalloproteinase inhibitor 1 OS=Homo sapiens OX=9606 GN=TIMP1 PE=1 SV=1	23.171	207	1.20052	0.263656	0.3417	0.399059
P01591	JCHAIN	Immunoglobulin J chain OS=Homo sapiens OX=9606 GN=JCHAIN PE=1 SV=4	18.099	159	1.18549	0.245478	0.4636	0.524855
P01602	IGKV1-5	Immunoglobulin kappa variable 1-5 OS=Homo sapiens OX=9606 GN=IGKV1-5 PE=1 SV=2	12.782	117	1.43716	0.52322	0.06874	0.105574
P01614	IGKV2D-40	Immunoglobulin kappa variable 2D-40 OS=Homo sapiens OX=9606 GN=IGKV2D-40 PE=1 SV=2	13.31	121	0.99457	-0.00785533	0.978	0.978
P01701	IGLV1-51	Immunoglobulin lambda variable 1-51 OS=Homo sapiens OX=9606 GN=IGLV1-51 PE=1 SV=2	12.249	117	1.24737	0.318887	0.2392	0.291917
P01709	IGLV2-8	Immunoglobulin lambda variable 2-8 OS=Homo sapiens OX=9606 GN=IGLV2-8 PE=1 SV=2	12.382	118	0.842441	-0.247353	0.6084	0.659438
P01717	IGLV3-25	Immunoglobulin lambda variable 3-25 OS=Homo sapiens OX=9606 GN=IGLV3-25 PE=1 SV=2	12.011	112	1.56962	0.650416	0.1047	0.147449
P01766	IGHV3-13	Immunoglobulin heavy variable 3-13 OS=Homo sapiens OX=9606 GN=IGHV3-13 PE=1 SV=2	12.506	116	1.53311	0.616464	0.1399	0.188541
P01780	IGHV3-7	Immunoglobulin heavy variable 3-7 OS=Homo sapiens OX=9606 GN=IGHV3-7 PE=1 SV=2	12.943	117	1.41312	0.498887	0.08623	0.126199
P01834	IGKC	Immunoglobulin kappa constant OS=Homo sapiens OX=9606 GN=IGKC PE=1 SV=2	11.765	107	1.35887	0.442407	0.06658	0.102644
P01857	IGHG1	Immunoglobulin heavy constant gamma 1 OS=Homo sapiens OX=9606 GN=IGHG1 PE=1 SV=1	36.106	330	1.39851	0.483895	0.088	0.127459
P01871	IGHM	Immunoglobulin heavy constant mu OS=Homo sapiens OX=9606 GN=IGHM PE=1 SV=4	49.44	453	1.10477	0.143744	0.6989	0.736923
P01876	IGHA1	Immunoglobulin heavy constant alpha 1 OS=Homo sapiens OX=9606 GN=IGHA1 PE=1 SV=2	37.655	353	1.12953	0.175719	0.5549	0.614542
P01877	IGHA2	Immunoglobulin heavy constant alpha 2 OS=Homo sapiens OX=9606 GN=IGHA2 PE=1 SV=4	36.591	340	1.30045	0.379013	0.2461	0.298993
P01880	IGHD	Immunoglobulin heavy constant delta OS=Homo sapiens OX=9606 GN=IGHD PE=1 SV=3	42.353	384	1.22421	0.291852	0.3244	0.382698
P02042	HBD	Hemoglobin subunit delta OS=Homo sapiens OX=9606 GN=HBD PE=1 SV=2	16.055	147	1.0548	0.0769683	0.826	0.847874
P02655	APOC2	Apolipoprotein C-II OS=Homo sapiens OX=9606 GN=APOC2 PE=1 SV=1	11.284	101	1.43215	0.518178	0.06408	0.0989775
P02730	SLC4A1	Band 3 anion transport protein OS=Homo sapiens OX=9606 GN=SLC4A1 PE=1 SV=3	101.792	911	0.68695	-0.541724	0.2688	0.323673
P02747	C1QC	Complement C1q subcomponent subunit C OS=Homo sapiens OX=9606 GN=C1QC PE=1 SV=3	25.774	245	1.13421	0.181694	0.1884	0.239621
P02749	APOH	Beta-2-glycoprotein 1 OS=Homo sapiens OX=9606 GN=APOH PE=1 SV=3	38.298	345	1.12559	0.170681	0.4802	0.541389
P02760	AMBP	Protein AMBP OS=Homo sapiens OX=9606 GN=AMBP PE=1 SV=1	38.999	352	1.1821	0.241354	0.1295	0.176867
P02763	ORM1	Alpha-1-acid glycoprotein 1 OS=Homo sapiens OX=9606 GN=ORM1 PE=1 SV=1	23.512	201	1.05978	0.0837584	0.8342	0.855213
P02786	TFRC	Transferrin receptor protein 1 OS=Homo sapiens OX=9606 GN=TFRC PE=1 SV=2	84.871	760	1.07568	0.105249	0.7475	0.780814
P02787	TF	Serotransferrin OS=Homo sapiens OX=9606 GN=TF PE=1 SV=3	77.064	698	0.952395	-0.0703681	0.7878	0.815864
P02788	LTF	Lactotransferrin OS=Homo sapiens OX=9606 GN=LTF PE=1 SV=6	78.182	710	1.11839	0.16142	0.5071	0.566227
P02790	HPX	Hemopexin OS=Homo sapiens OX=9606 GN=HPX PE=1 SV=2	51.676	462	1.24117	0.311701	0.1109	0.154842
P04040	CAT	Catalase OS=Homo sapiens OX=9606 GN=CAT PE=1 SV=3	59.756	527	1.34612	0.428804	0.1509	0.201035
P04075	ALDOA	Fructose-bisphosphate aldolase A OS=Homo sapiens OX=9606 GN=ALDOA PE=1 SV=2	39.42	364	0.927165	-0.109103	0.5224	0.582512
P04196	HRG	Histidine-rich glycoprotein OS=Homo sapiens OX=9606 GN=HRG PE=1 SV=1	59.578	525	1.49793	0.582972	0.1881	0.239614
P04278	SHBG	Sex hormone-binding globulin OS=Homo sapiens OX=9606 GN=SHBG PE=1 SV=2	43.779	402	1.35125	0.434298	0.08382	0.123349
P04424	ASL	Argininosuccinate lyase OS=Homo sapiens OX=9606 GN=ASL PE=1 SV=4	51.658	464	1.41854	0.504405	0.08489	0.124505
P04632	CAPNS1	Calpain small subunit 1 OS=Homo sapiens OX=9606 GN=CAPNS1 PE=1 SV=1	28.316	268	0.975491	-0.0358	0.7277	0.763335
P04792	HSPB1	Heat shock protein beta-1 OS=Homo sapiens OX=9606 GN=HSPB1 PE=1 SV=2	22.783	205	0.727243	-0.459491	0.1412	0.189978
P05106	ITGB3	Integrin beta-3 OS=Homo sapiens OX=9606 GN=ITGB3 PE=1 SV=2	87.058	788	0.878978	-0.186101	0.3111	0.36861
P05109	S100A8	Protein S100-A8 OS=Homo sapiens OX=9606 GN=S100A8 PE=1 SV=1	10.835	93	0.977917	-0.0322155	0.9442	0.951211
P05155	SERPING1	Plasma protease C1 inhibitor OS=Homo sapiens OX=9606 GN=SERPING1 PE=1 SV=2	55.154	500	1.07084	0.0987484	0.6449	0.688909
P05546	SERPIND1	Heparin cofactor 2 OS=Homo sapiens OX=9606 GN=SERPIND1 PE=1 SV=3	57.071	499	1.46678	0.552652	0.06357	0.0984073
P05556	ITGB1	Integrin beta-1 OS=Homo sapiens OX=9606 GN=ITGB1 PE=1 SV=2	88.415	798	1.05236	0.0736332	0.6587	0.701809
P06312	IGKV4-1	Immunoglobulin kappa variable 4-1 OS=Homo sapiens OX=9606 GN=IGKV4-1 PE=1 SV=1	13.38	121	1.2249	0.292665	0.2896	0.346637
P06702	S100A9	Protein S100-A9 OS=Homo sapiens OX=9606 GN=S100A9 PE=1 SV=1	13.242	114	0.810142	-0.303754	0.4966	0.556794
P06727	APOA4	Apolipoprotein A-IV OS=Homo sapiens OX=9606 GN=APOA4 PE=1 SV=4	45.372	396	1.14484	0.195149	0.3342	0.392552
P06733	ENO1	Alpha-enolase OS=Homo sapiens OX=9606 GN=ENO1 PE=1 SV=2	47.169	434	0.793285	-0.334088	0.07925	0.118358
P06858	LPL	Lipoprotein lipase OS=Homo sapiens OX=9606 GN=LPL PE=1 SV=1	53.163	475	1.09769	0.134468	0.6045	0.65696
P06865	HEXA	Beta-hexosaminidase subunit alpha OS=Homo sapiens OX=9606 GN=HEXA PE=1 SV=2	60.703	529	1.1266	0.17198	0.3918	0.449824
P07093	SERPINE2	Glia-derived nexin OS=Homo sapiens OX=9606 GN=SERPINE2 PE=1 SV=1	44.002	398	0.826511	-0.274895	0.1843	0.236137
P07327	ADH1A	Alcohol dehydrogenase 1A OS=Homo sapiens OX=9606 GN=ADH1A PE=1 SV=2	39.859	375	1.79585	0.844664	0.1261	0.173095
P07602	PSAP	Prosaposin OS=Homo sapiens OX=9606 GN=PSAP PE=1 SV=2	58.113	524	1.44832	0.534384	0.05017	0.0818404
P08134	RHOC	Rho-related GTP-binding protein RhoC OS=Homo sapiens OX=9606 GN=RHOC PE=1 SV=1	22.006	193	1.03414	0.0484256	0.6332	0.681779
P08185	SERPINA6	Corticosteroid-binding globulin OS=Homo sapiens OX=9606 GN=SERPINA6 PE=1 SV=1	45.141	405	1.23675	0.306553	0.1723	0.222976
P08238	HSP90AB1	Heat shock protein HSP 90-beta OS=Homo sapiens OX=9606 GN=HSP90AB1 PE=1 SV=4	83.264	724	0.874485	-0.193495	0.04336	0.0726235
P08253	MMP2	72 kDa type IV collagenase OS=Homo sapiens OX=9606 GN=MMP2 PE=1 SV=2	73.882	660	1.05335	0.0749896	0.5502	0.611
P08254	MMP3	Stromelysin-1 OS=Homo sapiens OX=9606 GN=MMP3 PE=1 SV=2	53.977	477	1.31076	0.3904	0.2749	0.330042
P08319	ADH4	All-trans-retinol dehydrogenase [NAD(+)] ADH4 OS=Homo sapiens OX=9606 GN=ADH4 PE=1 SV=5	40.222	380	1.71213	0.77579	0.1115	0.155413
P08514	ITGA2B	Integrin alpha-IIb OS=Homo sapiens OX=9606 GN=ITGA2B PE=1 SV=3	113.377	1039	1.15442	0.207173	0.09441	0.134588
P08519	LPA	Apolipoprotein(a) OS=Homo sapiens OX=9606 GN=LPA PE=1 SV=1	501.319	4548	1.75459	0.811133	0.08728	0.126868
P08670	VIM	Vimentin OS=Homo sapiens OX=9606 GN=VIM PE=1 SV=4	53.652	466	0.964961	-0.0514579	0.7768	0.806524
P09960	LTA4H	Leukotriene A-4 hydrolase OS=Homo sapiens OX=9606 GN=LTA4H PE=1 SV=2	69.285	611	1.13653	0.184633	0.4601	0.523075
P0C0L4	C4A	Complement C4-A OS=Homo sapiens OX=9606 GN=C4A PE=1 SV=2	192.785	1744	1.34075	0.423035	0.1869	0.238459
P0DJI9	SAA2	Serum amyloid A-2 protein OS=Homo sapiens OX=9606 GN=SAA2 PE=1 SV=1	13.527	122	1.79631	0.845037	0.05898	0.092436
P0DMV8	HSPA1A	Heat shock 70 kDa protein 1A OS=Homo sapiens OX=9606 GN=HSPA1A PE=1 SV=1	70.052	641	1.11728	0.159991	0.1085	0.152274
P0DP04	IGHV3-43D	Immunoglobulin heavy variable 3-43D OS=Homo sapiens OX=9606 GN=IGHV3-43D PE=3 SV=1	13.017	118	1.00998	0.0143311	0.9487	0.953787
P10321	HLA-C	HLA class I histocompatibility antigen, C alpha chain OS=Homo sapiens OX=9606 GN=HLA-C PE=1 SV=3	40.649	366	1.15976	0.213825	0.227	0.279121
P10599	TXN	Thioredoxin OS=Homo sapiens OX=9606 GN=TXN PE=1 SV=3	11.738	105	0.796269	-0.328673	0.05227	0.0849257
P10644	PRKAR1A	cAMP-dependent protein kinase type I-alpha regulatory subunit OS=Homo sapiens OX=9606 GN=PRKAR1A PE=1 SV=1	42.982	381	1.0686	0.0957259	0.6812	0.723886
P10645	CHGA	Chromogranin-A OS=Homo sapiens OX=9606 GN=CHGA PE=1 SV=7	50.688	457	0.984816	-0.0220732	0.9357	0.94422
P10809	HSPD1	60 kDa heat shock protein, mitochondrial OS=Homo sapiens OX=9606 GN=HSPD1 PE=1 SV=2	61.055	573	1.15852	0.212281	0.09161	0.131951
P11021	HSPA5	Endoplasmic reticulum chaperone BiP OS=Homo sapiens OX=9606 GN=HSPA5 PE=1 SV=2	72.333	654	1.18216	0.241422	0.0206	0.0414035
P11142	HSPA8	Heat shock cognate 71 kDa protein OS=Homo sapiens OX=9606 GN=HSPA8 PE=1 SV=1	70.898	646	1.13012	0.176471	0.03924	0.0676724
P11226	MBL2	Mannose-binding protein C OS=Homo sapiens OX=9606 GN=MBL2 PE=1 SV=2	26.144	248	1.18177	0.24095	0.578	0.633233
P11413	G6PD	Glucose-6-phosphate 1-dehydrogenase OS=Homo sapiens OX=9606 GN=G6PD PE=1 SV=4	59.257	515	1.21248	0.277965	0.07932	0.118358
P11940	PABPC1	Polyadenylate-binding protein 1 OS=Homo sapiens OX=9606 GN=PABPC1 PE=1 SV=2	70.671	636	0.842402	-0.24742	0.01449	0.031453
P12111	COL6A3	Collagen alpha-3(VI) chain OS=Homo sapiens OX=9606 GN=COL6A3 PE=1 SV=5	343.669	3177	1.26171	0.335376	0.07829	0.117797
P12814	ACTN1	Alpha-actinin-1 OS=Homo sapiens OX=9606 GN=ACTN1 PE=1 SV=2	103.058	892	0.741977	-0.430553	0.1236	0.170816
P12931	SRC	Proto-oncogene tyrosine-protein kinase Src OS=Homo sapiens OX=9606 GN=SRC PE=1 SV=3	59.835	536	0.959438	-0.0597382	0.6058	0.657495
P13489	RNH1	Ribonuclease inhibitor OS=Homo sapiens OX=9606 GN=RNH1 PE=1 SV=2	49.973	461	1.17603	0.233923	0.08365	0.123349
P13796	LCP1	Plastin-2 OS=Homo sapiens OX=9606 GN=LCP1 PE=1 SV=6	70.288	627	1.20424	0.268119	0.08238	0.122367
P13798	APEH	Acylamino-acid-releasing enzyme OS=Homo sapiens OX=9606 GN=APEH PE=1 SV=4	81.225	732	0.950086	-0.0738693	0.6402	0.686591
P14314	PRKCSH	Glucosidase 2 subunit beta OS=Homo sapiens OX=9606 GN=PRKCSH PE=1 SV=2	59.425	528	0.890132	-0.167908	0.3167	0.374156
P14317	HCLS1	Hematopoietic lineage cell-specific protein OS=Homo sapiens OX=9606 GN=HCLS1 PE=1 SV=3	54.014	486	0.690784	-0.533693	0.05395	0.0868427
P14780	MMP9	Matrix metalloproteinase-9 OS=Homo sapiens OX=9606 GN=MMP9 PE=1 SV=3	78.458	707	1.08013	0.111206	0.2243	0.27718
P16035	TIMP2	Metalloproteinase inhibitor 2 OS=Homo sapiens OX=9606 GN=TIMP2 PE=1 SV=2	24.399	220	1.14759	0.198611	0.1635	0.213626
P17655	CAPN2	Calpain-2 catalytic subunit OS=Homo sapiens OX=9606 GN=CAPN2 PE=1 SV=6	79.995	700	1.07986	0.110841	0.3283	0.386179
P19652	ORM2	Alpha-1-acid glycoprotein 2 OS=Homo sapiens OX=9606 GN=ORM2 PE=1 SV=2	23.603	201	1.3449	0.427498	0.1323	0.179787
P19971	TYMP	Thymidine phosphorylase OS=Homo sapiens OX=9606 GN=TYMP PE=1 SV=2	49.955	482	0.995423	-0.00661842	0.9491	0.953787
P20340	RAB6A	Ras-related protein Rab-6A OS=Homo sapiens OX=9606 GN=RAB6A PE=1 SV=3	23.593	208	0.921047	-0.118653	0.08395	0.123349
P21333	FLNA	Filamin-A OS=Homo sapiens OX=9606 GN=FLNA PE=1 SV=4	280.739	2647	0.754392	-0.406614	0.1526	0.202968
P21695	GPD1	Glycerol-3-phosphate dehydrogenase [NAD(+)], cytoplasmic OS=Homo sapiens OX=9606 GN=GPD1 PE=1 SV=4	37.568	349	1.23936	0.30959	0.2205	0.273608
P22059	OSBP	Oxysterol-binding protein 1 OS=Homo sapiens OX=9606 GN=OSBP PE=1 SV=1	89.421	807	1.16165	0.216176	0.2978	0.354399
P22234	PAICS	Multifunctional protein ADE2 OS=Homo sapiens OX=9606 GN=PAICS PE=1 SV=3	47.079	425	0.783953	-0.351161	0.09584	0.13615
P22694	PRKACB	cAMP-dependent protein kinase catalytic subunit beta OS=Homo sapiens OX=9606 GN=PRKACB PE=1 SV=2	40.623	351	0.871367	-0.198648	0.2269	0.279121
P22792	CPN2	Carboxypeptidase N subunit 2 OS=Homo sapiens OX=9606 GN=CPN2 PE=1 SV=3	60.557	545	1.23987	0.310186	0.1755	0.22604
P22891	PROZ	Vitamin K-dependent protein Z OS=Homo sapiens OX=9606 GN=PROZ PE=1 SV=2	44.744	400	1.62937	0.704313	0.05473	0.087525
P22897	MRC1	Macrophage mannose receptor 1 OS=Homo sapiens OX=9606 GN=MRC1 PE=1 SV=1	166.012	1456	1.44267	0.52874	0.05389	0.0868427
P23142	FBLN1	Fibulin-1 OS=Homo sapiens OX=9606 GN=FBLN1 PE=1 SV=4	77.214	703	1.182	0.241234	0.2278	0.279682
P24298	GPT	Alanine aminotransferase 1 OS=Homo sapiens OX=9606 GN=GPT PE=1 SV=3	54.637	496	1.72084	0.783114	0.05554	0.0881278
P25311	AZGP1	Zinc-alpha-2-glycoprotein OS=Homo sapiens OX=9606 GN=AZGP1 PE=1 SV=2	34.259	298	1.08227	0.114064	0.6036	0.656859
P25786	PSMA1	Proteasome subunit alpha type-1 OS=Homo sapiens OX=9606 GN=PSMA1 PE=1 SV=1	29.556	263	1.20092	0.264137	0.2198	0.273156
P25787	PSMA2	Proteasome subunit alpha type-2 OS=Homo sapiens OX=9606 GN=PSMA2 PE=1 SV=2	25.899	234	1.25097	0.323052	0.1595	0.209071
P25788	PSMA3	Proteasome subunit alpha type-3 OS=Homo sapiens OX=9606 GN=PSMA3 PE=1 SV=2	28.433	255	1.10212	0.140279	0.5526	0.612829
P25789	PSMA4	Proteasome subunit alpha type-4 OS=Homo sapiens OX=9606 GN=PSMA4 PE=1 SV=1	29.484	261	0.953653	-0.0684642	0.8128	0.837493
P26038	MSN	Moesin OS=Homo sapiens OX=9606 GN=MSN PE=1 SV=3	67.82	577	0.853031	-0.229329	0.01848	0.0382766
P27361	MAPK3	Mitogen-activated protein kinase 3 OS=Homo sapiens OX=9606 GN=MAPK3 PE=1 SV=4	43.136	379	1.03921	0.0554855	0.4356	0.496608
P28062	PSMB8	Proteasome subunit beta type-8 OS=Homo sapiens OX=9606 GN=PSMB8 PE=1 SV=3	30.354	276	1.12656	0.171923	0.3252	0.383087
P28066	PSMA5	Proteasome subunit alpha type-5 OS=Homo sapiens OX=9606 GN=PSMA5 PE=1 SV=3	26.411	241	1.13673	0.184887	0.3403	0.397995
P28072	PSMB6	Proteasome subunit beta type-6 OS=Homo sapiens OX=9606 GN=PSMB6 PE=1 SV=4	25.358	239	1.26023	0.33369	0.08651	0.126199
P29122	PCSK6	Proprotein convertase subtilisin/kexin type 6 OS=Homo sapiens OX=9606 GN=PCSK6 PE=1 SV=1	106.42	969	1.03027	0.0430187	0.8003	0.826706
P29218	IMPA1	Inositol monophosphatase 1 OS=Homo sapiens OX=9606 GN=IMPA1 PE=1 SV=1	30.189	277	0.992152	-0.0113668	0.9361	0.94422
P29350	PTPN6	Tyrosine-protein phosphatase non-receptor type 6 OS=Homo sapiens OX=9606 GN=PTPN6 PE=1 SV=1	67.561	595	1.14674	0.197543	0.2632	0.317871
P30041	PRDX6	Peroxiredoxin-6 OS=Homo sapiens OX=9606 GN=PRDX6 PE=1 SV=3	25.035	224	0.867772	-0.204611	0.07448	0.11311
P30153	PPP2R1A	Serine/threonine-protein phosphatase 2A 65 kDa regulatory subunit A alpha isoform OS=Homo sapiens OX=9606 GN=PPP2R1A PE=1 SV=4	65.309	589	0.991345	-0.0125404	0.8532	0.872493
P30566	ADSL	Adenylosuccinate lyase OS=Homo sapiens OX=9606 GN=ADSL PE=1 SV=2	54.889	484	0.781837	-0.35506	0.07693	0.11618
P30622	CLIP1	CAP-Gly domain-containing linker protein 1 OS=Homo sapiens OX=9606 GN=CLIP1 PE=1 SV=2	162.246	1438	1.00638	0.00917767	0.9605	0.964053
P30626	SRI	Sorcin OS=Homo sapiens OX=9606 GN=SRI PE=1 SV=1	21.676	198	0.890765	-0.166884	0.132	0.179787
P31327	CPS1	Carbamoyl-phosphate synthase [ammonia], mitochondrial OS=Homo sapiens OX=9606 GN=CPS1 PE=1 SV=2	164.939	1500	1.29398	0.371816	0.4909	0.551162
P32119	PRDX2	Peroxiredoxin-2 OS=Homo sapiens OX=9606 GN=PRDX2 PE=1 SV=5	21.892	198	0.878144	-0.187471	0.6964	0.735767
P33176	KIF5B	Kinesin-1 heavy chain OS=Homo sapiens OX=9606 GN=KIF5B PE=1 SV=1	109.685	963	0.937406	-0.0932548	0.311	0.36861
P35443	THBS4	Thrombospondin-4 OS=Homo sapiens OX=9606 GN=THBS4 PE=1 SV=2	105.869	961	1.10413	0.142911	0.2589	0.313142
P35573	AGL	Glycogen debranching enzyme OS=Homo sapiens OX=9606 GN=AGL PE=1 SV=3	174.764	1532	0.981107	-0.027518	0.8812	0.898868
P35858	IGFALS	Insulin-like growth factor-binding protein complex acid labile subunit OS=Homo sapiens OX=9606 GN=IGFALS PE=1 SV=1	66.035	605	1.33155	0.413103	0.05281	0.0856322
P35998	PSMC2	26S proteasome regulatory subunit 7 OS=Homo sapiens OX=9606 GN=PSMC2 PE=1 SV=3	48.634	433	0.860369	-0.216972	0.2098	0.262734
P36507	MAP2K2	Dual specificity mitogen-activated protein kinase kinase 2 OS=Homo sapiens OX=9606 GN=MAP2K2 PE=1 SV=1	44.424	400	1.04569	0.0644609	0.642	0.687033
P36871	PGM1	Phosphoglucomutase-1 OS=Homo sapiens OX=9606 GN=PGM1 PE=1 SV=3	61.449	562	1.20298	0.266614	0.2335	0.285818
P36969	GPX4	Phospholipid hydroperoxide glutathione peroxidase OS=Homo sapiens OX=9606 GN=GPX4 PE=1 SV=3	22.175	197	0.913949	-0.129815	0.4608	0.52314
P36980	CFHR2	Complement factor H-related protein 2 OS=Homo sapiens OX=9606 GN=CFHR2 PE=1 SV=1	30.651	270	1.3475	0.430282	0.07096	0.108574
P38606	ATP6V1A	V-type proton ATPase catalytic subunit A OS=Homo sapiens OX=9606 GN=ATP6V1A PE=1 SV=2	68.304	617	1.11146	0.152455	0.1102	0.154129
P40227	CCT6A	T-complex protein 1 subunit zeta OS=Homo sapiens OX=9606 GN=CCT6A PE=1 SV=3	58.024	531	0.930017	-0.104672	0.1438	0.192206
P40763	STAT3	Signal transducer and activator of transcription 3 OS=Homo sapiens OX=9606 GN=STAT3 PE=1 SV=2	88.068	770	0.675886	-0.565149	0.05299	0.0857532
P43251	BTD	Biotinidase OS=Homo sapiens OX=9606 GN=BTD PE=1 SV=2	61.133	543	1.11392	0.15565	0.2265	0.279121
P43652	AFM	Afamin OS=Homo sapiens OX=9606 GN=AFM PE=1 SV=1	69.069	599	1.28514	0.361928	0.08714	0.126868
P45974	USP5	Ubiquitin carboxyl-terminal hydrolase 5 OS=Homo sapiens OX=9606 GN=USP5 PE=1 SV=2	95.786	858	0.892227	-0.164518	0.09517	0.135434
P46940	IQGAP1	Ras GTPase-activating-like protein IQGAP1 OS=Homo sapiens OX=9606 GN=IQGAP1 PE=1 SV=1	189.252	1657	0.811481	-0.301371	0.09248	0.132767
P47755	CAPZA2	F-actin-capping protein subunit alpha-2 OS=Homo sapiens OX=9606 GN=CAPZA2 PE=1 SV=3	32.949	286	1.11968	0.163091	0.07851	0.11791
P47756	CAPZB	F-actin-capping protein subunit beta OS=Homo sapiens OX=9606 GN=CAPZB PE=1 SV=4	31.35	277	1.11734	0.160063	0.2035	0.255631
P49368	CCT3	T-complex protein 1 subunit gamma OS=Homo sapiens OX=9606 GN=CCT3 PE=1 SV=4	60.534	545	1.02898	0.0412098	0.5488	0.610389
P49588	AARS1	Alanine--tRNA ligase, cytoplasmic OS=Homo sapiens OX=9606 GN=AARS1 PE=1 SV=2	106.81	968	0.913756	-0.130118	0.1953	0.247238
P49619	DGKG	Diacylglycerol kinase gamma OS=Homo sapiens OX=9606 GN=DGKG PE=1 SV=3	89.124	791	0.741713	-0.431067	0.1229	0.170137
P49720	PSMB3	Proteasome subunit beta type-3 OS=Homo sapiens OX=9606 GN=PSMB3 PE=1 SV=2	22.949	205	1.15353	0.20606	0.3106	0.36861
P49721	PSMB2	Proteasome subunit beta type-2 OS=Homo sapiens OX=9606 GN=PSMB2 PE=1 SV=1	22.836	201	0.975626	-0.0355992	0.8907	0.905156
P49747	COMP	Cartilage oligomeric matrix protein OS=Homo sapiens OX=9606 GN=COMP PE=1 SV=2	82.86	757	1.08824	0.122001	0.507	0.566227
P50225	SULT1A1	Sulfotransferase 1A1 OS=Homo sapiens OX=9606 GN=SULT1A1 PE=1 SV=3	34.165	295	0.718765	-0.476408	0.0546	0.087489
P50502	ST13	Hsc70-interacting protein OS=Homo sapiens OX=9606 GN=ST13 PE=1 SV=2	41.332	369	0.989759	-0.0148514	0.9267	0.937061
P50570	DNM2	Dynamin-2 OS=Homo sapiens OX=9606 GN=DNM2 PE=1 SV=2	98.064	870	1.04712	0.0664242	0.347	0.404089
P51570	GALK1	Galactokinase OS=Homo sapiens OX=9606 GN=GALK1 PE=1 SV=1	42.272	392	0.86918	-0.202273	0.1094	0.153273
P51606	RENBP	N-acylglucosamine 2-epimerase OS=Homo sapiens OX=9606 GN=RENBP PE=1 SV=2	48.831	427	1.05739	0.0805095	0.3827	0.439997
P51659	HSD17B4	Peroxisomal multifunctional enzyme type 2 OS=Homo sapiens OX=9606 GN=HSD17B4 PE=1 SV=3	79.686	736	1.03948	0.0558614	0.7323	0.767171
P51884	LUM	Lumican OS=Homo sapiens OX=9606 GN=LUM PE=1 SV=2	38.429	338	1.24514	0.316311	0.2053	0.257495
P52306	RAP1GDS1	Rap1 GTPase-GDP dissociation stimulator 1 OS=Homo sapiens OX=9606 GN=RAP1GDS1 PE=1 SV=3	66.317	607	1.01329	0.0190451	0.808	0.833602
P52565	ARHGDIA	Rho GDP-dissociation inhibitor 1 OS=Homo sapiens OX=9606 GN=ARHGDIA PE=1 SV=3	23.207	204	1.08551	0.118368	0.2787	0.334112
P53004	BLVRA	Biliverdin reductase A OS=Homo sapiens OX=9606 GN=BLVRA PE=1 SV=2	33.428	296	1.20962	0.274553	0.09423	0.134567
P55209	NAP1L1	Nucleosome assembly protein 1-like 1 OS=Homo sapiens OX=9606 GN=NAP1L1 PE=1 SV=1	45.374	391	0.852744	-0.229815	0.001539	0.00890782
P55957	BID	BH3-interacting domain death agonist OS=Homo sapiens OX=9606 GN=BID PE=1 SV=1	21.995	195	1.08828	0.122046	0.4728	0.533785
P59998	ARPC4	Actin-related protein 2/3 complex subunit 4 OS=Homo sapiens OX=9606 GN=ARPC4 PE=1 SV=3	19.667	168	0.90078	-0.150753	0.3573	0.412542
P60228	EIF3E	Eukaryotic translation initiation factor 3 subunit E OS=Homo sapiens OX=9606 GN=EIF3E PE=1 SV=1	52.221	445	1.22034	0.287281	0.2676	0.322706
P60900	PSMA6	Proteasome subunit alpha type-6 OS=Homo sapiens OX=9606 GN=PSMA6 PE=1 SV=1	27.399	246	1.09239	0.127489	0.579	0.633476
P61106	RAB14	Ras-related protein Rab-14 OS=Homo sapiens OX=9606 GN=RAB14 PE=1 SV=4	23.897	215	1.12154	0.165483	0.2695	0.324037
P61981	YWHAG	14-3-3 protein gamma OS=Homo sapiens OX=9606 GN=YWHAG PE=1 SV=2	28.303	247	0.855619	-0.224959	0.02912	0.0542418
P62136	PPP1CA	Serine/threonine-protein phosphatase PP1-alpha catalytic subunit OS=Homo sapiens OX=9606 GN=PPP1CA PE=1 SV=1	37.512	330	0.866966	-0.205953	0.1864	0.238194
P62191	PSMC1	26S proteasome regulatory subunit 4 OS=Homo sapiens OX=9606 GN=PSMC1 PE=1 SV=1	49.185	440	0.905974	-0.142459	0.6423	0.687033
P62195	PSMC5	26S proteasome regulatory subunit 8 OS=Homo sapiens OX=9606 GN=PSMC5 PE=1 SV=1	45.626	406	1.06023	0.0843815	0.4087	0.467907
P62805	H4C1	Histone H4 OS=Homo sapiens OX=9606 GN=H4C1 PE=1 SV=2	11.367	103	1.44679	0.532857	0.08651	0.126199
P62826	RAN	GTP-binding nuclear protein Ran OS=Homo sapiens OX=9606 GN=RAN PE=1 SV=3	24.423	216	0.828165	-0.272009	0.163	0.213315
P62879	GNB2	Guanine nucleotide-binding protein G(I)/G(S)/G(T) subunit beta-2 OS=Homo sapiens OX=9606 GN=GNB2 PE=1 SV=3	37.331	340	1.1032	0.141691	0.4493	0.511511
P62937	PPIA	Peptidyl-prolyl cis-trans isomerase A OS=Homo sapiens OX=9606 GN=PPIA PE=1 SV=2	18.012	165	0.817667	-0.290415	0.2458	0.298993
P62993	GRB2	Growth factor receptor-bound protein 2 OS=Homo sapiens OX=9606 GN=GRB2 PE=1 SV=1	25.206	217	0.971734	-0.0413673	0.7015	0.738708
P63000	RAC1	Ras-related C3 botulinum toxin substrate 1 OS=Homo sapiens OX=9606 GN=RAC1 PE=1 SV=1	21.45	192	1.06547	0.091487	0.343	0.400003
P68363	TUBA1B	Tubulin alpha-1B chain OS=Homo sapiens OX=9606 GN=TUBA1B PE=1 SV=1	50.152	451	1.48851	0.573868	0.07763	0.11702
P68371	TUBB4B	Tubulin beta-4B chain OS=Homo sapiens OX=9606 GN=TUBB4B PE=1 SV=1	49.831	445	1.2423	0.313017	0.1538	0.204163
P68871	HBB	Hemoglobin subunit beta OS=Homo sapiens OX=9606 GN=HBB PE=1 SV=2	15.998	147	0.869144	-0.202332	0.6621	0.704509
P69892	HBG2	Hemoglobin subunit gamma-2 OS=Homo sapiens OX=9606 GN=HBG2 PE=1 SV=2	16.126	147	0.88926	-0.169322	0.5629	0.620028
P69905	HBA1	Hemoglobin subunit alpha OS=Homo sapiens OX=9606 GN=HBA1 PE=1 SV=2	15.258	142	0.544518	-0.876949	0.2359	0.288322
P81605	DCD	Dermcidin OS=Homo sapiens OX=9606 GN=DCD PE=1 SV=2	11.284	110	1.22591	0.293856	0.3121	0.369258
P84077	ARF1	ADP-ribosylation factor 1 OS=Homo sapiens OX=9606 GN=ARF1 PE=1 SV=2	20.697	181	0.938293	-0.0918898	0.09722	0.137842
Q00610	CLTC	Clathrin heavy chain 1 OS=Homo sapiens OX=9606 GN=CLTC PE=1 SV=5	191.615	1675	1.099	0.13619	0.29	0.346637
Q02108	GUCY1A1	Guanylate cyclase soluble subunit alpha-1 OS=Homo sapiens OX=9606 GN=GUCY1A1 PE=1 SV=2	77.453	690	0.862613	-0.213214	0.125	0.172166
Q02153	GUCY1B1	Guanylate cyclase soluble subunit beta-1 OS=Homo sapiens OX=9606 GN=GUCY1B1 PE=1 SV=1	70.514	619	1.06782	0.0946647	0.4619	0.523658
Q02818	NUCB1	Nucleobindin-1 OS=Homo sapiens OX=9606 GN=NUCB1 PE=1 SV=4	53.879	461	1.16788	0.223897	0.09293	0.133178
Q02985	CFHR3	Complement factor H-related protein 3 OS=Homo sapiens OX=9606 GN=CFHR3 PE=1 SV=2	37.323	330	1.30813	0.387503	0.1569	0.206327
Q03154	ACY1	Aminoacylase-1 OS=Homo sapiens OX=9606 GN=ACY1 PE=1 SV=1	45.885	408	1.19307	0.25468	0.562	0.619875
Q04637	EIF4G1	Eukaryotic translation initiation factor 4 gamma 1 OS=Homo sapiens OX=9606 GN=EIF4G1 PE=1 SV=4	175.491	1599	0.960418	-0.0582659	0.5641	0.620222
Q05209	PTPN12	Tyrosine-protein phosphatase non-receptor type 12 OS=Homo sapiens OX=9606 GN=PTPN12 PE=1 SV=3	88.106	780	0.700652	-0.513231	0.07091	0.108574
Q05655	PRKCD	Protein kinase C delta type OS=Homo sapiens OX=9606 GN=PRKCD PE=1 SV=2	77.505	676	0.895591	-0.159089	0.1976	0.249374
Q06187	BTK	Tyrosine-protein kinase BTK OS=Homo sapiens OX=9606 GN=BTK PE=1 SV=3	76.281	659	0.835852	-0.258681	0.01536	0.0329027
Q0ZGT2	NEXN	Nexilin OS=Homo sapiens OX=9606 GN=NEXN PE=1 SV=1	80.658	675	1.03609	0.0511437	0.8166	0.840344
Q12765	SCRN1	Secernin-1 OS=Homo sapiens OX=9606 GN=SCRN1 PE=1 SV=2	46.382	414	0.992237	-0.0112439	0.887	0.903652
Q13045	FLII	Protein flightless-1 homolog OS=Homo sapiens OX=9606 GN=FLII PE=1 SV=2	144.751	1269	0.962668	-0.0548904	0.6899	0.731222
Q13177	PAK2	Serine/threonine-protein kinase PAK 2 OS=Homo sapiens OX=9606 GN=PAK2 PE=1 SV=3	58.043	524	0.840574	-0.250554	0.1558	0.205677
Q13217	DNAJC3	DnaJ homolog subfamily C member 3 OS=Homo sapiens OX=9606 GN=DNAJC3 PE=1 SV=1	57.58	504	1.17475	0.232356	0.1214	0.168347
Q13228	SELENBP1	Methanethiol oxidase OS=Homo sapiens OX=9606 GN=SELENBP1 PE=1 SV=2	52.391	472	1.0549	0.0771005	0.6923	0.732812
Q13561	DCTN2	Dynactin subunit 2 OS=Homo sapiens OX=9606 GN=DCTN2 PE=1 SV=4	44.231	401	0.81521	-0.294757	0.1323	0.179787
Q13564	NAE1	NEDD8-activating enzyme E1 regulatory subunit OS=Homo sapiens OX=9606 GN=NAE1 PE=1 SV=1	60.246	534	0.887099	-0.172833	0.1845	0.236137
Q13976	PRKG1	cGMP-dependent protein kinase 1 OS=Homo sapiens OX=9606 GN=PRKG1 PE=1 SV=3	76.364	671	0.828494	-0.271437	0.09175	0.131951
Q14008	CKAP5	Cytoskeleton-associated protein 5 OS=Homo sapiens OX=9606 GN=CKAP5 PE=1 SV=3	225.495	2032	0.951534	-0.0716723	0.6355	0.683351
Q14103	HNRNPD	Heterogeneous nuclear ribonucleoprotein D0 OS=Homo sapiens OX=9606 GN=HNRNPD PE=1 SV=1	38.434	355	1.05058	0.0711874	0.6151	0.664047
Q14203	DCTN1	Dynactin subunit 1 OS=Homo sapiens OX=9606 GN=DCTN1 PE=1 SV=3	141.695	1278	1.00811	0.011646	0.9153	0.926684
Q14393	GAS6	Growth arrest-specific protein 6 OS=Homo sapiens OX=9606 GN=GAS6 PE=1 SV=3	74.925	678	1.23183	0.300809	0.143	0.191766
Q14697	GANAB	Neutral alpha-glucosidase AB OS=Homo sapiens OX=9606 GN=GANAB PE=1 SV=3	106.874	944	1.06967	0.0971649	0.2932	0.349948
Q14974	KPNB1	Importin subunit beta-1 OS=Homo sapiens OX=9606 GN=KPNB1 PE=1 SV=2	97.17	876	1.02621	0.0373287	0.7546	0.786485
Q15102	PAFAH1B3	Platelet-activating factor acetylhydrolase IB subunit alpha1 OS=Homo sapiens OX=9606 GN=PAFAH1B3 PE=1 SV=1	25.734	231	1.37901	0.463628	0.07435	0.11311
Q15126	PMVK	Phosphomevalonate kinase OS=Homo sapiens OX=9606 GN=PMVK PE=1 SV=3	21.995	192	0.854915	-0.226148	0.02171	0.0428931
Q15149	PLEC	Plectin OS=Homo sapiens OX=9606 GN=PLEC PE=1 SV=3	531.791	4684	1.31961	0.400106	0.2023	0.254517
Q15166	PON3	Serum paraoxonase/lactonase 3 OS=Homo sapiens OX=9606 GN=PON3 PE=1 SV=3	39.607	354	1.28215	0.358562	0.05526	0.0880267
Q15435	PPP1R7	Protein phosphatase 1 regulatory subunit 7 OS=Homo sapiens OX=9606 GN=PPP1R7 PE=1 SV=1	41.564	360	0.990459	-0.0138305	0.8899	0.905156
Q15485	FCN2	Ficolin-2 OS=Homo sapiens OX=9606 GN=FCN2 PE=1 SV=2	34.001	313	1.64335	0.71664	0.05404	0.0868427
Q15691	MAPRE1	Microtubule-associated protein RP/EB family member 1 OS=Homo sapiens OX=9606 GN=MAPRE1 PE=1 SV=3	29.999	268	0.966348	-0.0493857	0.5611	0.619722
Q15833	STXBP2	Syntaxin-binding protein 2 OS=Homo sapiens OX=9606 GN=STXBP2 PE=1 SV=2	66.453	593	0.971918	-0.0410938	0.795	0.822274
Q15848	ADIPOQ	Adiponectin OS=Homo sapiens OX=9606 GN=ADIPOQ PE=1 SV=1	26.414	244	1.58678	0.6661	0.06359	0.0984073
Q16401	PSMD5	26S proteasome non-ATPase regulatory subunit 5 OS=Homo sapiens OX=9606 GN=PSMD5 PE=1 SV=3	56.196	504	1.2003	0.2634	0.1436	0.192206
Q16531	DDB1	DNA damage-binding protein 1 OS=Homo sapiens OX=9606 GN=DDB1 PE=1 SV=1	126.968	1140	0.848409	-0.237167	0.04266	0.0717464
Q16537	PPP2R5E	Serine/threonine-protein phosphatase 2A 56 kDa regulatory subunit epsilon isoform OS=Homo sapiens OX=9606 GN=PPP2R5E PE=1 SV=1	54.699	467	0.789474	-0.341036	0.2134	0.266264
Q16543	CDC37	Hsp90 co-chaperone Cdc37 OS=Homo sapiens OX=9606 GN=CDC37 PE=1 SV=1	44.468	378	0.954899	-0.0665796	0.1963	0.248118
Q16555	DPYSL2	Dihydropyrimidinase-related protein 2 OS=Homo sapiens OX=9606 GN=DPYSL2 PE=1 SV=1	62.294	572	1.14244	0.192116	0.2194	0.273076
Q16769	QPCT	Glutaminyl-peptide cyclotransferase OS=Homo sapiens OX=9606 GN=QPCT PE=1 SV=1	40.877	361	1.1689	0.225152	0.2396	0.291968
Q16775	HAGH	Hydroxyacylglutathione hydrolase, mitochondrial OS=Homo sapiens OX=9606 GN=HAGH PE=1 SV=2	33.806	308	0.890959	-0.166569	0.5489	0.610389
Q27J81	INF2	Inverted formin-2 OS=Homo sapiens OX=9606 GN=INF2 PE=1 SV=2	135.624	1249	0.81918	-0.287747	0.2233	0.276661
Q2VIR3	EIF2S3B	Eukaryotic translation initiation factor 2 subunit 3B OS=Homo sapiens OX=9606 GN=EIF2S3B PE=2 SV=2	51.229	472	0.981032	-0.0276281	0.8524	0.872493
Q3LXA3	TKFC	Triokinase/FMN cyclase OS=Homo sapiens OX=9606 GN=TKFC PE=1 SV=2	58.947	575	1.22981	0.298439	0.4835	0.544355
Q3ZCW2	LGALSL	Galectin-related protein OS=Homo sapiens OX=9606 GN=LGALSL PE=1 SV=2	18.986	172	0.815192	-0.294788	0.1052	0.147898
Q4LDE5	SVEP1	Sushi, von Willebrand factor type A, EGF and pentraxin domain-containing protein 1 OS=Homo sapiens OX=9606 GN=SVEP1 PE=1 SV=3	390.17	3571	1.37333	0.457673	0.0628	0.0977111
Q5SYB0	FRMPD1	FERM and PDZ domain-containing protein 1 OS=Homo sapiens OX=9606 GN=FRMPD1 PE=1 SV=1	173.437	1578	1.22445	0.292136	0.1674	0.217673
Q5TDH0	DDI2	Protein DDI1 homolog 2 OS=Homo sapiens OX=9606 GN=DDI2 PE=1 SV=1	44.523	399	0.890181	-0.167829	0.6277	0.676752
Q6EEV6	SUMO4	Small ubiquitin-related modifier 4 OS=Homo sapiens OX=9606 GN=SUMO4 PE=1 SV=2	10.685	95	1.01024	0.0146988	0.9621	0.96447
Q6SJ93	FAM111B	Serine protease FAM111B OS=Homo sapiens OX=9606 GN=FAM111B PE=1 SV=1	84.674	734	1.41581	0.50163	0.05597	0.0882938
Q6ZNJ1	NBEAL2	Neurobeachin-like protein 2 OS=Homo sapiens OX=9606 GN=NBEAL2 PE=1 SV=2	302.517	2754	1.03341	0.0474096	0.7612	0.792349
Q7KZF4	SND1	Staphylococcal nuclease domain-containing protein 1 OS=Homo sapiens OX=9606 GN=SND1 PE=1 SV=1	101.997	910	0.863605	-0.211557	0.09337	0.133573
Q7L5N1	COPS6	COP9 signalosome complex subunit 6 OS=Homo sapiens OX=9606 GN=COPS6 PE=1 SV=1	36.163	327	0.932037	-0.101541	0.25	0.303279
Q7Z4W1	DCXR	L-xylulose reductase OS=Homo sapiens OX=9606 GN=DCXR PE=1 SV=2	25.913	244	1.2862	0.363117	0.05905	0.092436
Q86VP6	CAND1	Cullin-associated NEDD8-dissociated protein 1 OS=Homo sapiens OX=9606 GN=CAND1 PE=1 SV=2	136.376	1230	0.838648	-0.253863	0.176	0.226325
Q86YW5	TREML1	Trem-like transcript 1 protein OS=Homo sapiens OX=9606 GN=TREML1 PE=1 SV=2	32.679	311	1.06843	0.0954988	0.1807	0.232003
Q8N5J2	MINDY1	Ubiquitin carboxyl-terminal hydrolase MINDY-1 OS=Homo sapiens OX=9606 GN=MINDY1 PE=1 SV=2	51.778	469	0.69457	-0.525809	0.08346	0.123349
Q8NEU8	APPL2	DCC-interacting protein 13-beta OS=Homo sapiens OX=9606 GN=APPL2 PE=1 SV=3	74.493	664	1.19668	0.259042	0.1899	0.241152
Q8NEZ2	VPS37A	Vacuolar protein sorting-associated protein 37A OS=Homo sapiens OX=9606 GN=VPS37A PE=1 SV=1	44.314	397	0.801665	-0.318928	0.1559	0.205677
Q8NHW5	RPLP0P6	60S acidic ribosomal protein P0-like OS=Homo sapiens OX=9606 GN=RPLP0P6 PE=5 SV=1	34.364	317	1.25017	0.322122	0.155	0.205154
Q8WUA8	TSKU	Tsukushin OS=Homo sapiens OX=9606 GN=TSKU PE=2 SV=3	37.807	353	1.16222	0.216885	0.1692	0.219663
Q8WUM4	PDCD6IP	Programmed cell death 6-interacting protein OS=Homo sapiens OX=9606 GN=PDCD6IP PE=1 SV=1	96.023	868	0.8956	-0.159073	0.08746	0.126903
Q8WXD2	SCG3	Secretogranin-3 OS=Homo sapiens OX=9606 GN=SCG3 PE=1 SV=3	53.005	468	1.35259	0.43572	0.08979	0.129591
Q92496	CFHR4	Complement factor H-related protein 4 OS=Homo sapiens OX=9606 GN=CFHR4 PE=1 SV=3	65.351	578	1.21663	0.282894	0.4877	0.548326
Q93088	BHMT	Betaine--homocysteine S-methyltransferase 1 OS=Homo sapiens OX=9606 GN=BHMT PE=1 SV=2	44.998	406	1.31076	0.390404	0.154	0.204163
Q96BM9	ARL8A	ADP-ribosylation factor-like protein 8A OS=Homo sapiens OX=9606 GN=ARL8A PE=1 SV=1	21.416	186	0.925706	-0.111375	0.5827	0.636668
Q96C19	EFHD2	EF-hand domain-containing protein D2 OS=Homo sapiens OX=9606 GN=EFHD2 PE=1 SV=1	26.697	240	0.885851	-0.174864	0.3401	0.397995
Q96C24	SYTL4	Synaptotagmin-like protein 4 OS=Homo sapiens OX=9606 GN=SYTL4 PE=1 SV=2	76.024	671	0.992202	-0.0112945	0.9152	0.926684
Q96EP5	DAZAP1	DAZ-associated protein 1 OS=Homo sapiens OX=9606 GN=DAZAP1 PE=1 SV=1	43.383	407	1.12913	0.175209	0.1424	0.191277
Q96HC4	PDLIM5	PDZ and LIM domain protein 5 OS=Homo sapiens OX=9606 GN=PDLIM5 PE=1 SV=5	63.945	596	0.884806	-0.176567	0.07939	0.118358
Q96HR9	REEP6	Receptor expression-enhancing protein 6 OS=Homo sapiens OX=9606 GN=REEP6 PE=1 SV=2	23.418	211	1.78854	0.838783	0.149	0.19883
Q96IY4	CPB2	Carboxypeptidase B2 OS=Homo sapiens OX=9606 GN=CPB2 PE=1 SV=2	48.424	423	1.39113	0.476262	0.1046	0.147449
Q96KN2	CNDP1	Beta-Ala-His dipeptidase OS=Homo sapiens OX=9606 GN=CNDP1 PE=1 SV=4	56.706	507	1.24852	0.320221	0.1674	0.217673
Q96PD5	PGLYRP2	N-acetylmuramoyl-L-alanine amidase OS=Homo sapiens OX=9606 GN=PGLYRP2 PE=1 SV=1	62.217	576	1.21692	0.283229	0.2244	0.27718
Q96QD8	SLC38A2	Sodium-coupled neutral amino acid transporter 2 OS=Homo sapiens OX=9606 GN=SLC38A2 PE=1 SV=2	56.026	506	1.07473	0.103977	0.7482	0.780814
Q96RD9	FCRL5	Fc receptor-like protein 5 OS=Homo sapiens OX=9606 GN=FCRL5 PE=1 SV=3	106.437	977	1.13748	0.185845	0.2966	0.353488
Q96SB3	PPP1R9B	Neurabin-2 OS=Homo sapiens OX=9606 GN=PPP1R9B PE=1 SV=3	89.334	817	0.920461	-0.119572	0.5769	0.63288
Q99436	PSMB7	Proteasome subunit beta type-7 OS=Homo sapiens OX=9606 GN=PSMB7 PE=1 SV=1	29.965	277	0.971107	-0.0422983	0.9058	0.919353
Q99460	PSMD1	26S proteasome non-ATPase regulatory subunit 1 OS=Homo sapiens OX=9606 GN=PSMD1 PE=1 SV=2	105.836	953	0.937696	-0.0928071	0.355	0.411053
Q99627	COPS8	COP9 signalosome complex subunit 8 OS=Homo sapiens OX=9606 GN=COPS8 PE=1 SV=1	23.226	209	1.09433	0.130053	0.4023	0.461228
Q99685	MGLL	Monoglyceride lipase OS=Homo sapiens OX=9606 GN=MGLL PE=1 SV=2	33.261	303	0.980048	-0.0290752	0.8205	0.843292
Q99784	OLFM1	Noelin OS=Homo sapiens OX=9606 GN=OLFM1 PE=1 SV=4	55.343	485	1.06005	0.0841301	0.5646	0.620222
Q99983	OMD	Osteomodulin OS=Homo sapiens OX=9606 GN=OMD PE=1 SV=1	49.492	421	1.2295	0.298068	0.1379	0.186463
Q9BRK5	SDF4	45 kDa calcium-binding protein OS=Homo sapiens OX=9606 GN=SDF4 PE=1 SV=1	41.807	362	1.09174	0.126629	0.3485	0.404678
Q9BXN1	ASPN	Asporin OS=Homo sapiens OX=9606 GN=ASPN PE=1 SV=2	43.417	380	1.18235	0.241654	0.2018	0.25428
Q9GZP0	PDGFD	Platelet-derived growth factor D OS=Homo sapiens OX=9606 GN=PDGFD PE=1 SV=1	42.848	370	0.832571	-0.264355	0.1723	0.222976
Q9H267	VPS33B	Vacuolar protein sorting-associated protein 33B OS=Homo sapiens OX=9606 GN=VPS33B PE=1 SV=2	70.585	617	1.1473	0.198243	0.05122	0.0833862
Q9H324	ADAMTS10	A disintegrin and metalloproteinase with thrombospondin motifs 10 OS=Homo sapiens OX=9606 GN=ADAMTS10 PE=1 SV=2	120.874	1103	1.33958	0.421786	0.05586	0.0882913
Q9H479	FN3K	Fructosamine-3-kinase OS=Homo sapiens OX=9606 GN=FN3K PE=1 SV=1	35.171	309	1.09834	0.13532	0.348	0.404674
Q9NQ79	CRTAC1	Cartilage acidic protein 1 OS=Homo sapiens OX=9606 GN=CRTAC1 PE=1 SV=2	71.421	661	1.07358	0.102429	0.6561	0.699955
Q9NR12	PDLIM7	PDZ and LIM domain protein 7 OS=Homo sapiens OX=9606 GN=PDLIM7 PE=1 SV=1	49.845	457	0.917783	-0.123775	0.3758	0.432675
Q9NR31	SAR1A	GTP-binding protein SAR1a OS=Homo sapiens OX=9606 GN=SAR1A PE=1 SV=1	22.367	198	0.797527	-0.326395	0.08389	0.123349
Q9NRA1	PDGFC	Platelet-derived growth factor C OS=Homo sapiens OX=9606 GN=PDGFC PE=1 SV=2	39.029	345	1.17811	0.236476	0.4325	0.493766
Q9NRN5	OLFML3	Olfactomedin-like protein 3 OS=Homo sapiens OX=9606 GN=OLFML3 PE=2 SV=1	46.01	406	1.24728	0.318787	0.05811	0.0913157
Q9P2J5	LARS1	Leucine--tRNA ligase, cytoplasmic OS=Homo sapiens OX=9606 GN=LARS1 PE=1 SV=2	134.466	1176	0.913798	-0.130053	0.3602	0.415301
Q9UBN7	HDAC6	Histone deacetylase 6 OS=Homo sapiens OX=9606 GN=HDAC6 PE=1 SV=2	131.419	1215	0.844475	-0.243873	0.05409	0.0868427
Q9UEY8	ADD3	Gamma-adducin OS=Homo sapiens OX=9606 GN=ADD3 PE=1 SV=1	79.155	706	0.793776	-0.333197	0.06123	0.0956645
Q9UKE5	TNIK	TRAF2 and NCK-interacting protein kinase OS=Homo sapiens OX=9606 GN=TNIK PE=1 SV=1	154.943	1360	1.09852	0.135562	0.1156	0.160852
Q9UKK9	NUDT5	ADP-sugar pyrophosphatase OS=Homo sapiens OX=9606 GN=NUDT5 PE=1 SV=1	24.328	219	1.04835	0.0681267	0.7338	0.767755
Q9UL46	PSME2	Proteasome activator complex subunit 2 OS=Homo sapiens OX=9606 GN=PSME2 PE=1 SV=4	27.402	239	1.14739	0.198354	0.4232	0.483827
Q9UMX0	UBQLN1	Ubiquilin-1 OS=Homo sapiens OX=9606 GN=UBQLN1 PE=1 SV=2	62.519	589	0.866579	-0.206596	0.1941	0.246102
Q9UN19	DAPP1	Dual adapter for phosphotyrosine and 3-phosphotyrosine and 3-phosphoinositide OS=Homo sapiens OX=9606 GN=DAPP1 PE=1 SV=1	32.194	280	0.822205	-0.28243	0.213	0.266264
Q9UNW1	MINPP1	Multiple inositol polyphosphate phosphatase 1 OS=Homo sapiens OX=9606 GN=MINPP1 PE=1 SV=1	55.051	487	1.07402	0.103022	0.6397	0.686591
Q9UNZ2	NSFL1C	NSFL1 cofactor p47 OS=Homo sapiens OX=9606 GN=NSFL1C PE=1 SV=2	40.573	370	1.25893	0.332194	0.08282	0.122797
Q9Y3F4	STRAP	Serine-threonine kinase receptor-associated protein OS=Homo sapiens OX=9606 GN=STRAP PE=1 SV=1	38.438	350	0.818027	-0.28978	0.05652	0.0889889
Q9Y4E8	USP15	Ubiquitin carboxyl-terminal hydrolase 15 OS=Homo sapiens OX=9606 GN=USP15 PE=1 SV=3	112.419	981	1.00649	0.0093323	0.9685	0.969691
Q9Y5K8	ATP6V1D	V-type proton ATPase subunit D OS=Homo sapiens OX=9606 GN=ATP6V1D PE=1 SV=1	28.263	247	1.73441	0.794447	0.08142	0.121162
Q9Y613	FHOD1	FH1/FH2 domain-containing protein 1 OS=Homo sapiens OX=9606 GN=FHOD1 PE=1 SV=3	126.551	1164	0.582187	-0.780445	0.07523	0.114036
Q9Y646	CPQ	Carboxypeptidase Q OS=Homo sapiens OX=9606 GN=CPQ PE=1 SV=1	51.888	472	1.24217	0.312857	0.1583	0.207833
Q9Y6B6	SAR1B	GTP-binding protein SAR1b OS=Homo sapiens OX=9606 GN=SAR1B PE=1 SV=1	22.41	198	1.22823	0.296586	0.06736	0.10365
Q9Y6R7	FCGBP	IgGFc-binding protein OS=Homo sapiens OX=9606 GN=FCGBP PE=1 SV=3	572.017	5405	1.73925	0.798465	0.09737	0.137842
Q9Y6Z7	COLEC10	Collectin-10 OS=Homo sapiens OX=9606 GN=COLEC10 PE=1 SV=2	30.705	277	1.23346	0.302707	0.07893	0.118322
