# Supplementary material for: Proteomic characteristics of saliva in patients with different subgroups of IgG4-RD
Source: Front Immunol. 2022 Nov 22;13:1026921. doi: 10.3389/fimmu.2022.1026921 (PMC9723444; doi:10.3389/fimmu.2022.1026921)
Supplement: Supplementary Table 5 — Overlapped up DEPs in IgG4-RD patients in plasma in two datasets. [file Table_5.xlsx]

## Sheet: Table S5
Gene	log2 1/H	P-value	P.adjust
CRP	1.72786	0.004081	0.013614
IGHG4	1.28403	0.01299	0.02929
APOB	1.23134	0.000357	0.006706
OIT3	0.828323	0.001189	0.008344
ITIH3	0.76378	0.00989	0.024395
APOE	0.74271	0.004853	0.015039
FBLN7	0.719387	0.000272	0.006193
DSC2	0.67313	0.001004	0.008012
FGL1	0.550304	0.02822	0.052845
FBLN5	0.517503	0.005043	0.015432
ITLN1	0.465688	0.03031	0.05582
APOD	0.44807	0.02972	0.055107
VWF	0.398949	0.03201	0.057519
